# Supplementary material
Source: Research Square preprint supplement (doi:10.21203/rs.3.rs-8831370/v1)
Supplement: Supplementary file 1 [file fbe1733c2ccce10fc8ac3a25.xlsx]

## Sheet: Sheet1
Enterprise code	year	Centrality	Structural Hole	digital transformation	Industry		Firm Size	ROA	Firm Age	Tobin's Q	Leverage	Board Size	Ownership Concentration	Executives R&D Background	PROVINCE CODE	Ownership Nature	Perception of Economic Policy Uncertainty	Proportion of Independent Directors
000049	2018	1	1	3.96606	Electrical machinery and equipment manufacturing		22.9005	0.0578725	3.52636	0.879849	0.555778	2.19722	0.417826	0	440000	1	0	0.287657
000049	2023	1	1	4.03474	Electrical machinery and equipment manufacturing		23.5267	0.0305	3.66356	0.808963	0.478408	2.19722	0.398667	0	440000	1	0.362419	0.287657
000070	2012	2	1.5	3.72971	Electrical machinery and equipment manufacturing		21.4122	0.0270569	2.77259	0.843065	0.411605	2.30259	0.455794	0.142857	440000	1	0	0.336472
000070	2015	1	1	4.00586	Electrical machinery and equipment manufacturing		22.1007	-0.0745923	2.94444	1.33499	0.497431	2.19722	0.425883	0.285714	440000	1	0.177817	0.287657
000070	2016	2	0.875	3.77552	Electrical machinery and equipment manufacturing		22.2849	0.0284049	2.99573	1.14878	0.51426	2.19722	0.425883	0.285714	440000	1	0.15837	0.287657
000070	2017	2	0.875	3.9238	Electrical machinery and equipment manufacturing		22.4902	0.0404018	3.04452	0.953648	0.523649	2.07944	0.425883	0.375	440000	1	0.219859	0.318454
000070	2018	3	1.389	3.8934	Electrical machinery and equipment manufacturing		22.7	0.0409213	3.09104	0.83216	0.527613	2.19722	0.425883	0.375	440000	1	0.153943	0.287657
000070	2019	2	1.5	3.93078	Electrical machinery and equipment manufacturing		22.6819	0.0505123	3.13549	1.03615	0.465682	2.19722	0.364554	0.285714	440000	1	0.251738	0.287657
000070	2020	1	1	3.95364	Electrical machinery and equipment manufacturing		23.0344	0.00576485	3.17805	0.891565	0.533586	2.07944	0.35918	0.285714	440000	1	0.239196	0.318454
000070	2021	4	1.594	4.10225	Electrical machinery and equipment manufacturing		22.8424	-0.0750949	3.21888	0.853428	0.528974	2.19722	0.357533	0.222222	440000	1	0.138103	0.287657
000070	2022	6	1.707	4.01178	Electrical machinery and equipment manufacturing		22.7867	0.00682326	3.2581	0.890229	0.530331	2.19722	0.358559	0.25	440000	1	0.179109	0.287657
000070	2023	6	1.707	3.97018	Computer, communication, and other electronic equipment manufacturing		22.8136	-0.0281887	3.29584	0.943394	0.526077	2.19722	0.340313	0.375	440000	1	0.210392	0.287657
000333	2013	17	1.908	3.78354	Electrical machinery and equipment manufacturing		25.2974	0.0821225	2.63906	0.783858	0.468054	2.63906	0.395268	0	440000	0	0.196382	0.30535
000333	2014	15	1.894	3.92219	Electrical machinery and equipment manufacturing		25.5132	0.0924124	2.70805	0.836966	0.482321	2.56495	0.395482	0.111111	440000	0	0.215701	0.325411
000333	2015	28	1.952	4.13767	Electrical machinery and equipment manufacturing		25.5819	0.100521	2.77259	0.851162	0.447958	2.48491	0.399856	0.111111	440000	0	0.372856	0.34833
000333	2016	24	1.946	4.03461	Electrical machinery and equipment manufacturing		25.8626	0.088905	2.83321	0.968337	0.467302	2.30259	0.356998	0.1	440000	0	0.292699	0.336472
000333	2017	29	1.951	4.19385	Electrical machinery and equipment manufacturing		26.0998	0.0723326	2.89037	1.12979	0.510286	2.30259	0.408714	0.0909091	440000	0	0.228178	0.336472
000333	2018	32	1.953	4.21356	Electrical machinery and equipment manufacturing		26.2497	0.0789055	2.94444	0.941165	0.50041	2.19722	0.428816	0.0909091	440000	0	0.291157	0.287657
000333	2019	26	1.922	4.24002	Electrical machinery and equipment manufacturing		26.3951	0.0803917	2.99573	1.08704	0.497132	2.07944	0.43921	0.0909091	440000	0	0.112294	0.405465
000333	2020	27	1.914	4.23424	Electrical machinery and equipment manufacturing		26.4299	0.0735533	3.04452	1.26259	0.50396	2.07944	0.417808	0.153846	440000	0	0.026628	0.318454
000333	2021	28	1.905	4.2249	Electrical machinery and equipment manufacturing		26.4523	0.0721274	3.09104	1.0851	0.502268	2.19722	0.434793	0.153846	440000	0	0.0282691	0.287657
000333	2022	24	1.889	4.26314	Electrical machinery and equipment manufacturing		26.4438	0.0681702	3.13549	0.911486	0.494979	2.19722	0.452608	0.2	440000	0	0.033913	0.287657
000333	2023	33	1.901	4.31128	Electrical machinery and equipment manufacturing		26.4403	0.0671253	3.17805	0.884956	0.495542	2.19722	0.442574	0.133333	440000	0	0.0918589	0.287657
000400	2011	14	1.792	4.01175	Electrical machinery and equipment manufacturing		22.6794	0.0421152	3.3673	0.888514	0.457736	2.19722	0.309855	0.333333	410000	1	0.067502	0.287657
000400	2012	11	1.683	3.92502	Electrical machinery and equipment manufacturing		22.6585	0.0790299	3.4012	0.963633	0.431635	2.19722	0.317793	0.375	410000	1	0.237064	0.287657
000400	2013	15	1.767	4.01901	Electrical machinery and equipment manufacturing		22.8384	0.0888288	3.43399	1.13621	0.431535	2.07944	0.277522	0.375	410000	1	0.178487	0.318454
000400	2014	19	1.831	4.03587	Electrical machinery and equipment manufacturing		23.1021	0.112849	3.46574	1.02163	0.352307	2.19722	0.369112	0.428571	410000	1	0.076823	0.287657
000400	2015	33	1.85	4.03313	Electrical machinery and equipment manufacturing		23.248	0.0625374	3.49651	1.00978	0.371365	2.19722	0.39993	0.428571	410000	1	0.212096	0.287657
000400	2016	48	1.875	4.04172	Electrical machinery and equipment manufacturing		23.3836	0.0636923	3.52636	0.936024	0.386637	2.19722	0.404367	0.428571	410000	1	0.185114	0.287657
000400	2017	54	1.88	3.96366	Electrical machinery and equipment manufacturing		23.4517	0.0435728	3.55535	0.849296	0.384768	2.19722	0.398268	0.428571	410000	1	0.338774	0.287657
000400	2018	45	1.879	4.0724	Electrical machinery and equipment manufacturing		23.4027	0.0186028	3.58352	0.713886	0.355552	2.19722	0.391866	0.625	410000	1	0.215023	0.287657
000400	2019	56	1.886	4.07336	Electrical machinery and equipment manufacturing		23.4373	0.0322428	3.61092	0.762977	0.354158	2.19722	0.406257	0.538462	410000	1	0.21048	0.287657
000400	2020	61	1.891	4.18066	Electrical machinery and equipment manufacturing		23.545	0.0466528	3.61092	0.841643	0.373375	2.19722	0.433909	0.666667	410000	1	0.122733	0.287657
000400	2021	43	1.865	4.04776	Electrical machinery and equipment manufacturing		23.595	0.0473724	3.63759	1.06974	0.354276	2.19722	0.366645	0.444444	410000	1	0.0593928	0.287657
000400	2022	47	1.9	3.97883	Electrical machinery and equipment manufacturing		23.6654	0.0498775	3.66356	0.911033	0.353936	2.19722	0.374731	0.166667	410000	1	0.0873613	0.287657
000400	2023	70	1.931	4.00306	Electrical machinery and equipment manufacturing		23.8099	0.0527332	3.68888	0.909336	0.382628	2.19722	0.397764	0.666667	410000	1	0.0720669	0.287657
000527	2011	6	1.833	3.67085	Electrical machinery and equipment manufacturing		24.8101	0.0734868	2.99573	0.811747	0.45586	2.19722	0.391491	0	440000	0	0	0.287657
000527	2012	7	1.857	3.80036	Electrical machinery and equipment manufacturing		24.8325	0.0655982	3.04452	0.781565	0.438364	2.19722	0.395448	0	440000	0	0.178479	0.287657
000533	2011	1	1	3.37371	Electrical machinery and equipment manufacturing		21.5167	0.0313371	2.99573	1.09993	0.43031	2.3979	0.34934	0	440000	0	0.161119	0.310128
000533	2012	1	1	3.43509	Electrical machinery and equipment manufacturing		21.6058	0.0308055	3.04452	0.990066	0.435825	2.3979	0.353081	0	440000	0	0.0875194	0.310128
000533	2013	2	0.875	3.4598	Electrical machinery and equipment manufacturing		22.0667	0.0467753	3.09104	0.807816	0.403749	2.3979	0.352931	0	440000	0	0.0223923	0.310128
000533	2015	1	1	3.76556	Electrical machinery and equipment manufacturing		22.1501	0.0404451	3.17805	1.15368	0.399836	2.3979	0.346609	0	440000	0	0.232912	0.310128
000533	2020	1	1	3.6938	Electrical machinery and equipment manufacturing		21.6171	0.0343773	3.3673	0.902605	0.476788	2.19722	0.357986	0	440000	0	0.0879043	0.287657
000533	2023	1	1	3.82036	Electrical machinery and equipment manufacturing		21.7015	0.0331353	3.46574	1.05269	0.503611	2.19722	0.35327	0	440000	0	0.155694	0.287657
000541	2023	1	1	3.95966	Electrical machinery and equipment manufacturing		23.5526	0.0224612	3.46574	0.66529	0.352758	1.94591	0.339543	0.2	440000	1	0.0980408	0.356695
000585	2013	1	1	3.86123	Electrical machinery and equipment manufacturing		19.9527	0.0206629	3.04452	1.53033	0.332459	1.94591	0.434759	0	210000	0	0.28344	0.356695
000651	2011	10	1.85	3.47328	Electrical machinery and equipment manufacturing		25.1684	0.0603111	3.13549	0.854979	0.579046	2.07944	0.291896	0.5	440000	1	0.0839419	0.318454
000651	2012	13	1.859	3.53682	Electrical machinery and equipment manufacturing		25.4014	0.0669307	3.17805	0.897459	0.555952	2.07944	0.281292	0.5	440000	1	0.482933	0.318454
000651	2013	18	1.911	3.8369	Electrical machinery and equipment manufacturing		25.6189	0.0786189	3.21888	0.902637	0.550854	2.07944	0.291526	0.4	440000	1	0	0.318454
000651	2014	18	1.904	3.90709	Electrical machinery and equipment manufacturing		25.7746	0.0873055	3.2581	0.884905	0.53715	2.19722	0.296004	0.4	440000	1	0.083773	0.287657
000651	2015	22	1.921	4.12345	Electrical machinery and equipment manufacturing		25.809	0.0751722	3.29584	0.927149	0.53042	2.19722	0.283218	0.333333	440000	1	0.130053	0.287657
000651	2016	17	1.904	4.03421	Electrical machinery and equipment manufacturing		25.9293	0.0816973	3.3322	0.919137	0.529942	2.07944	0.305349	0.333333	440000	1	0	0.318454
000651	2017	27	1.933	4.09724	Electrical machinery and equipment manufacturing		26.0938	0.0995799	3.3673	1.06644	0.524192	1.94591	0.345976	0.428571	440000	1	0	0.356695
000651	2018	34	1.958	4.19467	Electrical machinery and equipment manufacturing		26.2497	0.0998433	3.4012	0.909031	0.489171	1.79176	0.337974	0.428571	440000	1	0.293104	0.287657
000651	2019	35	1.958	4.14961	Electrical machinery and equipment manufacturing		26.3686	0.0840998	3.43399	1.09548	0.472521	2.19722	0.381196	0.5	440000	1	0.141763	0.287657
000651	2020	45	1.968	4.19569	Electrical machinery and equipment manufacturing		26.3553	0.0767681	3.46574	1.06778	0.458311	2.07944	0.392786	0.428571	440000	0	0.275229	0.318454
000651	2021	53	1.968	4.11119	Electrical machinery and equipment manufacturing		26.4523	0.069003	3.49651	0.852245	0.508208	1.94591	0.341105	0.285714	440000	0	0	0.356695
000651	2022	51	1.967	4.03269	Electrical machinery and equipment manufacturing		26.4438	0.0628022	3.52636	0.799367	0.538273	2.19722	0.341228	0.25	440000	0	0	0.367694
000651	2023	53	1.967	4.03944	Electrical machinery and equipment manufacturing		26.4403	0.0726112	3.55535	0.771502	0.514143	2.19722	0.339789	0.125	440000	0	0.133934	0.367694
000682	2012	8	1.705	3.83511	Electrical machinery and equipment manufacturing		21.599	0.0245569	2.94444	0.954606	0.297777	2.19722	0.194873	0.571429	370000	1	0.072443	0.287657
000682	2013	5	1.523	3.91719	Electrical machinery and equipment manufacturing		21.7086	0.033009	2.99573	0.888801	0.325186	2.19722	0.188703	0.571429	370000	1	0.0307622	0.287657
000682	2014	5	1.618	3.90624	Electrical machinery and equipment manufacturing		21.8566	0.0344499	3.04452	1.09139	0.361428	2.19722	0.188981	0.5	370000	1	0	0.287657
000682	2015	3	1.389	4.18187	Electrical machinery and equipment manufacturing		21.9076	0.0341084	3.09104	1.2896	0.350594	2.19722	0.190154	0.5	370000	1	0.258387	0.287657
000682	2016	3	1.389	4.00585	Electrical machinery and equipment manufacturing		21.9491	0.0425775	3.13549	1.0725	0.340301	2.19722	0.19335	0.5	370000	1	0.222361	0.287657
000682	2017	3	1.667	4.06079	Electrical machinery and equipment manufacturing		22.29	0.0381359	3.17805	0.829088	0.294065	2.19722	0.208056	0.5	370000	1	0.227737	0.287657
000682	2018	3	1.389	4.03203	Electrical machinery and equipment manufacturing		22.3632	0.0423937	3.21888	0.771816	0.310025	2.07944	0.363146	0.285714	370000	1	0.134521	0.318454
000806	2014	1	1	3.81588	Electrical machinery and equipment manufacturing		21.5139	0.010377	3.09104	1.40055	0.481032	1.94591	0.190358	0	450000	0	0.195127	0.356695
000806	2016	1	1	3.95163	Electrical machinery and equipment manufacturing		21.7833	0.00567324	3.17805	1.68049	0.237722	1.94591	0.401582	0.333333	450000	0	0.205035	0.356695
000836	2013	1	1	3.89678	Electrical machinery and equipment manufacturing		21.6217	0.00733893	2.83321	0.815346	0.453568	2.07944	0.243907	0	120000	0	0.203263	0.318454
000836	2014	1	1	3.67413	Electrical machinery and equipment manufacturing		21.5488	-0.0852561	2.89037	0.974397	0.484542	2.19722	0.24512	0	120000	0	0.0748853	0.287657
000836	2015	1	1	3.87691	Electrical machinery and equipment manufacturing		21.932	0.039013	2.94444	1.17462	0.366125	2.3979	0.304196	0	120000	0	0.0761016	0.310128
000836	2016	1	1	4.01471	Electrical machinery and equipment manufacturing		21.6791	0.029287	2.99573	1.5103	0.228365	2.3979	0.253755	0	120000	0	0.179823	0.310128
000836	2017	1	1	4.02207	Electrical machinery and equipment manufacturing		21.6985	0.050449	3.04452	1.13174	0.202803	2.3979	0.216857	0	120000	0	0.180867	0.310128
000836	2018	1	1	3.99332	Electrical machinery and equipment manufacturing		21.8464	0.0346073	3.09104	1.09082	0.370043	2.3979	0.227378	0	120000	0	0.102313	0.310128
000836	2019	1	1	3.7621	Electrical machinery and equipment manufacturing		21.6683	0.0185758	3.13549	1.17505	0.402691	2.19722	0.217714	0.2	120000	0	0.0647475	0.287657
000836	2020	1	1	3.91653	Electrical machinery and equipment manufacturing		21.6833	0.00626724	3.17805	1.0363	0.402452	2.19722	0.216654	0.2	120000	0	0.0545987	0.287657
000967	2015	1	1	3.74259	Electrical machinery and equipment manufacturing		22.4203	0.0195026	3.13549	1.09546	0.314235	1.94591	0.448977	0.25	330000	0	0.259248	0.356695
000967	2017	3	1.667	3.82071	Electrical machinery and equipment manufacturing		22.8209	0.0424237	3.21888	0.902868	0.374138	1.94591	0.447959	0.333333	330000	0	0.132162	0.356695
001283	2022	1	1	3.65377	Electrical machinery and equipment manufacturing		22.3142	0.0319063	3.04452	0.740799	0.432695	2.07944	0.344632	0.25	440000	0	0.115365	0.318454
001283	2023	1	1	3.62727	Electrical machinery and equipment manufacturing		22.8696	0.00586298	3.09104	0.760354	0.530942	2.19722	0.317139	0.25	440000	0	0.0428001	0.287657
002005	2013	1	1	3.59661	Electrical machinery and equipment manufacturing		23.1138	0.000423447	2.89037	0.897617	0.475253	2.07944	0.297269	0.5	440000	0	0.167513	0.318454
002005	2014	1	1	3.66026	Electrical machinery and equipment manufacturing		23.2833	0.00103214	2.94444	0.847834	0.434917	2.19722	0.333216	0.375	440000	0	0.0840831	0.287657
002026	2023	4	1.75	3.93312	Electrical machinery and equipment manufacturing		22.3906	0.0333981	3.2581	0.785576	0.298642	2.19722	0.342198	0	370000	0	0.169243	0.287657
002028	2011	3	1.667	3.86933	Electrical machinery and equipment manufacturing		22.0561	0.0436796	2.48491	0.926376	0.227558	1.94591	0.39712	0	310000	0	0.0944097	0.356695
002028	2012	5	1.587	3.91668	Electrical machinery and equipment manufacturing		22.1918	0.0643803	2.56495	0.932168	0.263682	1.94591	0.38168	0	310000	0	0.0793858	0.356695
002028	2013	4	1.437	3.84612	Electrical machinery and equipment manufacturing		22.3313	0.0781589	2.63906	0.904788	0.271108	1.94591	0.381249	0.142857	310000	0	0.0890532	0.356695
002028	2014	1	1	3.70784	Electrical machinery and equipment manufacturing		22.416	0.0886704	2.70805	0.937173	0.26754	1.94591	0.367333	0.333333	310000	0	0.0844859	0.356695
002028	2015	3	1.667	3.79721	Electrical machinery and equipment manufacturing		22.5466	0.0669167	2.77259	0.999284	0.289557	1.94591	0.370651	0.4	310000	0	0.143926	0.356695
002028	2016	6	1.604	3.71868	Electrical machinery and equipment manufacturing		22.5889	0.0603454	2.83321	0.980373	0.282334	1.94591	0.380081	0.25	310000	0	0.562403	0.356695
002028	2017	7	1.748	3.67557	Electrical machinery and equipment manufacturing		22.6387	0.0400283	2.89037	1.04599	0.289476	1.94591	0.39711	0	310000	0	0.596924	0.356695
002028	2018	9	1.726	3.84279	Electrical machinery and equipment manufacturing		22.7487	0.0380548	2.94444	0.82487	0.321338	1.94591	0.395156	0	310000	0	0.534256	0.356695
002028	2020	6	1.637	3.84141	Electrical machinery and equipment manufacturing		23.128	0.0859346	3.04452	0.955504	0.332223	1.60944	0.334199	0	310000	0	0.487116	0.451967
002028	2021	2	1.5	3.76392	Electrical machinery and equipment manufacturing		23.3562	0.0874969	3.09104	1.28633	0.32358	1.94591	0.320904	0	310000	0	0.469134	0.356695
002028	2022	3	1.667	3.73935	Electrical machinery and equipment manufacturing		23.4776	0.0787654	3.13549	1.09441	0.336033	1.94591	0.334139	0	310000	0	0.591511	0.356695
002028	2023	7	1.709	3.84349	Electrical machinery and equipment manufacturing		23.6536	0.0823757	3.17805	1.17251	0.358126	1.94591	0.360293	0	310000	0	0.461725	0.356695
002032	2023	1	1	3.77422	Electrical machinery and equipment manufacturing		23.2964	0.153822	3.2581	1.56153	0.414151	2.19722	0.65518	0	330000	0	0.190095	0.287657
002035	2017	1	1	3.92693	Electrical machinery and equipment manufacturing		22.1608	0.117831	3.2581	1.65748	0.380348	1.94591	0.29889	0	440000	0	0	0.356695
002035	2020	1	1	3.92763	Electrical machinery and equipment manufacturing		22.4886	0.0686982	3.3673	0.987737	0.369204	1.94591	0.296401	0	440000	0	0.0501232	0.356695
002074	2016	1	1	3.79223	Electrical machinery and equipment manufacturing		23.0471	0.0963226	3.09104	1.16684	0.477676	1.94591	0.383551	0.363636	320000	0	0.0906828	0.356695
002074	2017	1	1	3.77928	Electrical machinery and equipment manufacturing		23.5622	0.0479725	3.13549	0.936813	0.416838	2.19722	0.37094	0.363636	320000	0	0.169322	0.287657
002074	2018	1	1	3.80836	Electrical machinery and equipment manufacturing		23.7479	0.0278632	3.17805	0.78744	0.460389	2.19722	0.367632	0.4	320000	0	0.102972	0.287657
002074	2023	1	1	3.82946	Electrical machinery and equipment manufacturing		25.2622	0.0103012	3.3673	0.739892	0.541765	2.19722	0.365493	0.333333	340000	0	0.0872828	0.367694
002076	2013	1	1	3.41988	Electrical machinery and equipment manufacturing		20.158	0.0277223	2.30259	1.15098	0.252154	1.94591	0.391268	0.25	440000	0	0.0459851	0.356695
002090	2011	1	1	3.97256	Electrical machinery and equipment manufacturing		20.7451	0.0419798	2.83321	1.13194	0.367113	2.19722	0.445627	0.375	320000	0	0.046847	0.287657
002090	2012	1	1	4.01544	Electrical machinery and equipment manufacturing		20.905	0.0380948	2.89037	0.965579	0.404267	2.19722	0.445627	0.285714	320000	0	0.126351	0.287657
002090	2013	1	1	4.10553	Electrical machinery and equipment manufacturing		21.1551	0.0394555	2.94444	1.04514	0.452609	2.19722	0.437049	0	320000	0	0.122065	0.287657
002090	2014	1	1	4.023	Electrical machinery and equipment manufacturing		21.2237	0.067695	2.99573	1.16566	0.415406	2.19722	0.450616	0.2	320000	0	0.12003	0.287657
002090	2015	1	1	4.05167	Electrical machinery and equipment manufacturing		21.695	0.0512712	3.04452	1.4989	0.432764	2.19722	0.423952	0.2	320000	0	0.186673	0.287657
002090	2016	2	0.875	4.0689	Electrical machinery and equipment manufacturing		22.063	0.0367815	3.09104	1.08457	0.497504	2.07944	0.419804	0.25	320000	0	0.116297	0.318454
002090	2017	4	1.234	4.06691	Electrical machinery and equipment manufacturing		22.1023	0.0358248	3.13549	1.06909	0.517458	2.19722	0.417635	0.25	320000	0	0.11164	0.287657
002090	2018	2	1.5	4.09212	Electrical machinery and equipment manufacturing		22.0762	0.0230091	3.17805	0.982003	0.502926	2.19722	0.405969	0.25	320000	0	0.0992456	0.287657
002090	2019	1	1	3.99228	Electrical machinery and equipment manufacturing		22.0295	0.0250215	3.21888	1.02448	0.490766	2.19722	0.350069	0.2	320000	0	0.0587023	0.287657
002090	2020	4	1.594	4.13499	Electrical machinery and equipment manufacturing		21.9716	0.0222231	3.2581	0.933191	0.469466	2.19722	0.349116	0.25	320000	0	0.139168	0.287657
002090	2021	3	1.667	4.07286	Electrical machinery and equipment manufacturing		21.6404	0.0612061	3.29584	1.09737	0.390932	2.19722	0.36822	0.25	320000	0	0.0671468	0.287657
002090	2023	3	1.667	4.02043	Electrical machinery and equipment manufacturing		21.7952	0.0211751	3.3673	1.05299	0.402015	2.19722	0.277217	0.333333	320000	0	0.0465959	0.287657
002112	2011	2	0.875	3.74531	Electrical machinery and equipment manufacturing		20.8558	-0.0285077	2.3979	0.85265	0.479686	2.3979	0.294761	0.166667	330000	1	0.115736	0.310128
002139	2018	1	1	4.08319	Electrical machinery and equipment manufacturing		22.0898	0.0520297	3.13549	0.852061	0.35702	2.19722	0.285994	0.4	440000	0	0.0864593	0.287657
002139	2019	1	1	4.15798	Electrical machinery and equipment manufacturing		22.3504	0.0634969	3.17805	0.904766	0.397806	2.19722	0.26523	0.333333	440000	0	0.1367	0.287657
002139	2020	3	1.389	4.15107	Electrical machinery and equipment manufacturing		22.6365	0.0775898	3.21888	0.990826	0.392861	2.19722	0.232863	0.2	440000	0	0.281419	0.287657
002139	2021	3	1.667	4.19209	Electrical machinery and equipment manufacturing		22.9858	0.0578459	3.2581	1.27113	0.383479	2.19722	0.262215	0.2	440000	0	0.210106	0.287657
002139	2022	4	1.75	4.15781	Electrical machinery and equipment manufacturing		23.0617	0.0546119	3.29584	0.948023	0.36346	2.19722	0.224172	0.2	440000	0	0.211738	0.287657
002141	2018	1	1	3.67852	Electrical machinery and equipment manufacturing		21.3336	0.00298883	3.52636	1.12471	0.227212	1.60944	0.456923	0	440000	0	0.137013	0.336472
002141	2020	1	1	3.65107	Electrical machinery and equipment manufacturing		20.8779	-0.411964	3.58352	1.11781	0.30648	1.94591	0.456923	0	440000	0	0.178368	0.356695
002141	2021	1	1	3.69715	Electrical machinery and equipment manufacturing		21.0561	0.0278836	3.61092	1.89639	0.33	1.94591	0.436793	0	440000	0	0.448267	0.356695
002169	2011	3	1.667	3.90087	Electrical machinery and equipment manufacturing		20.9014	0.0236228	1.94591	1.03745	0.391763	2.19722	0.290232	0.6	440000	0	0.113158	0.287657
002169	2012	2	1.5	3.90708	Electrical machinery and equipment manufacturing		21.0121	-0.0355727	2.07944	0.904152	0.428765	2.19722	0.278159	0.6	440000	0	0.0859931	0.287657
002169	2013	2	1.5	3.89626	Electrical machinery and equipment manufacturing		21.0675	0.0173059	2.19722	0.967975	0.433694	2.19722	0.278045	0.6	440000	0	0.0443237	0.287657
002169	2014	1	1	3.88684	Electrical machinery and equipment manufacturing		21.187	0.0309386	2.30259	1.16108	0.450783	2.19722	0.272733	0.4	440000	0	0.0959048	0.287657
002169	2016	1	1	4.00152	Electrical machinery and equipment manufacturing		22.036	0.0387544	2.48491	1.11161	0.192637	2.19722	0.250101	0.4	440000	0	0.0867847	0.287657
002169	2017	1	1	3.75175	Electrical machinery and equipment manufacturing		22.1602	0.0361993	2.56495	0.798362	0.248594	2.19722	0.250208	0.4	440000	0	0.0781444	0.287657
002169	2018	3	1.389	4.0638	Electrical machinery and equipment manufacturing		22.3825	0.0152214	2.63906	0.671401	0.349473	2.19722	0.243637	0.2	440000	0	0.0689548	0.287657
002169	2019	5	1.7	4.03501	Electrical machinery and equipment manufacturing		22.4771	0.0169546	2.70805	0.870176	0.389891	2.07944	0.239492	0.166667	440000	0	0.0362096	0.318454
002169	2020	3	1.389	4.02653	Electrical machinery and equipment manufacturing		22.4255	0.0419443	2.77259	0.897924	0.333844	2.19722	0.241045	0.166667	440000	0	0.160508	0.287657
002169	2021	4	1.437	4.02875	Electrical machinery and equipment manufacturing		22.5468	0.0428213	2.83321	1.08582	0.377484	2.19722	0.225794	0.142857	440000	0	0.173497	0.287657
002169	2022	4	1.437	3.96855	Electrical machinery and equipment manufacturing		22.5853	0.0049754	2.89037	0.871882	0.383527	2.19722	0.240624	0.333333	440000	0	0.174948	0.287657
002169	2023	2	0.875	3.96432	Electrical machinery and equipment manufacturing		22.8399	-0.0192994	2.94444	0.809614	0.471277	2.19722	0.232811	0.333333	440000	0	0.11102	0.287657
002176	2019	1	1	3.77633	Electrical machinery and equipment manufacturing		22.4497	-0.425893	3.3673	1.04494	0.53193	1.94591	0.224251	0.2	360000	0	0.0406781	0.356695
002176	2021	1	1	3.78716	Electrical machinery and equipment manufacturing		22.4151	0.0685	3.43399	2.09867	0.491051	2.3979	0.210684	0	360000	0	0.06729	0.310128
002176	2022	1	1	3.77377	Electrical machinery and equipment manufacturing		22.7014	0.200769	3.46574	1.70878	0.340061	1.94591	0.199139	0	360000	0	0.0202888	0.356695
002180	2013	1	1	3.89925	Electrical machinery and equipment manufacturing		19.8632	0.00553004	2.30259	1.18643	0.107218	1.94591	0.42694	0.333333	440000	0	0.153298	0.356695
002180	2015	1	1	3.79629	Computer, communication, and other electronic equipment manufacturing		21.8609	0.0903891	2.48491	1.2476	0.318706	2.19722	0.608633	0.142857	440000	0	0.172507	0.287657
002180	2016	1	1	3.74207	Computer, communication, and other electronic equipment manufacturing		24.6875	-0.00517904	2.56495	0.735645	0.634951	2.19722	0.59962	0.142857	440000	0	0	0.287657
002180	2017	3	1.667	4.04068	Computer, communication, and other electronic equipment manufacturing		24.2936	0.0400428	2.63906	0.874365	0.587048	2.19722	0.582653	0	440000	0	0.0566403	0.287657
002180	2018	2	0.875	3.87502	Computer, communication, and other electronic equipment manufacturing		24.3099	0.0331704	2.70805	0.879983	0.566927	2.19722	0.558793	0	440000	0	0	0.287657
002180	2021	1	1	4.01459	Computer, communication, and other electronic equipment manufacturing		24.498	0.0359738	2.89037	1.03418	0.456404	2.07944	0.346477	0	440000	0	0.168181	0.318454
002184	2014	1	1	3.86846	Electrical machinery and equipment manufacturing		21.1605	0.0414125	2.70805	1.08926	0.356575	2.19722	0.458032	0	310000	0	0.0384367	0.287657
002184	2018	2	0.875	4.00793	Electrical machinery and equipment manufacturing		21.476	-0.0794763	2.94444	0.837992	0.400714	2.19722	0.414089	0.2	310000	0	0.202904	0.287657
002184	2020	1	1	4.10669	Electrical machinery and equipment manufacturing		21.5765	0.0653501	3.04452	0.947138	0.379969	2.07944	0.409499	0	310000	0	0.10778	0.318454
002184	2023	1	1	4.17088	Electrical machinery and equipment manufacturing		22.2269	0.0332823	3.17805	0.934417	0.471655	1.94591	0.387527	0	310000	0	0.0768755	0.356695
002196	2013	1	1	3.37673	Special equipment manufacturing		20.6214	0.00600349	2.56495	0.892037	0.275386	2.07944	0.491202	0.5	330000	0	0.125636	0.318454
002196	2017	1	1	3.88832	Special equipment manufacturing		21.9148	0.0393369	2.83321	0.848898	0.221737	2.19722	0.321182	0.5	330000	0	0.214309	0.287657
002196	2018	1	1	3.81733	Special equipment manufacturing		21.7643	-0.201067	2.89037	0.735701	0.284868	2.19722	0.308226	0.75	330000	0	0.158308	0.287657
002196	2020	1	1	3.93771	Special equipment manufacturing		21.6575	-0.297534	2.99573	0.990485	0.340471	2.07944	0.254176	0.666667	330000	0	0.0945245	0.318454
002196	2022	1	1	3.95015	Special equipment manufacturing		22.0645	-0.0631132	3.09104	0.950508	0.510843	1.94591	0.208959	0.5	330000	0	0.022076	0.356695
002196	2023	2	1.5	3.93388	Electrical machinery and equipment manufacturing		22.1287	0.0241192	3.13549	0.921994	0.503247	2.07944	0.18171	0.5	330000	1	0.0172478	0.318454
002202	2011	1	1	3.503	Electrical machinery and equipment manufacturing		24.1874	0.0222251	2.3979	0.782826	0.460382	2.19722	0.397989	0.5	650000	0	0.17797	0.287657
002202	2012	1	1	3.60215	General equipment manufacturing		24.1872	0.00516666	2.48491	0.708342	0.46001	2.07944	0.383498	0.5	650000	0	0.0188863	0.318454
002202	2014	4	1.417	3.53495	General equipment manufacturing		24.5471	0.0396915	2.63906	0.874573	0.511246	2.19722	0.380457	0.444444	650000	0	0.0156009	0.287657
002202	2016	5	1.47	3.84398	General equipment manufacturing		24.889	0.0470723	2.77259	0.841367	0.518065	2.07944	0.434854	0.428571	650000	0	0.0764752	0.318454
002202	2018	3	1.667	3.83246	General equipment manufacturing		25.1222	0.039552	2.89037	0.736828	0.51558	2.19722	0.456728	0.555556	650000	0	0.106427	0.287657
002202	2019	2	1.5	3.77841	General equipment manufacturing		25.3585	0.0214054	2.94444	0.761789	0.523139	2.19722	0.456965	0.6	650000	0	0.106626	0.287657
002202	2020	5	1.509	3.86042	General equipment manufacturing		25.4159	0.0268092	2.99573	0.781938	0.518526	2.19722	0.47404	0.6	650000	0	0.207621	0.287657
002202	2021	5	1.587	3.87653	General equipment manufacturing		25.5054	0.0288319	3.04452	0.798931	0.52759	2.19722	0.432842	0.5	650000	0	0.254004	0.287657
002202	2022	18	1.853	3.89167	General equipment manufacturing		25.6419	0.0176538	3.09104	0.710978	0.533635	2.19722	0.447952	0.583333	650000	0	0.163607	0.287657
002202	2023	12	1.862	3.79385	General equipment manufacturing		25.6896	0.0105522	3.13549	0.674989	0.54212	2.07944	0.424428	0.545455	650000	0	0.139925	0.318454
002218	2011	1	1	3.46344	Computer, communication, and other electronic equipment manufacturing		21.4247	-0.0717861	1.60944	1.27843	0.258266	2.19722	0.501366	0.285714	440000	0	0	0.287657
002218	2014	1	1	3.5597	Electrical machinery and equipment manufacturing		21.885	-0.0015472	2.07944	1.08915	0.445223	2.07944	0.46672	0.333333	440000	0	0.104424	0.318454
002218	2015	3	1.667	3.6166	Electrical machinery and equipment manufacturing		22.1698	0.00728468	2.19722	1.01685	0.326617	2.19722	0.418577	0.333333	440000	0	0.197555	0.287657
002218	2016	2	1.5	3.50967	Electrical machinery and equipment manufacturing		22.2927	0.0264407	2.30259	0.949355	0.362667	2.19722	0.406072	0.285714	440000	0	0.135986	0.287657
002218	2017	2	1.5	3.77485	Electrical machinery and equipment manufacturing		22.4725	0.0272809	2.3979	0.965509	0.410742	2.19722	0.40071	0.285714	440000	0	0.246423	0.287657
002218	2021	2	1.5	3.66685	Electrical machinery and equipment manufacturing		22.6743	0.0273989	2.70805	0.976052	0.338262	2.19722	0.364291	0.333333	440000	0	0.188052	0.287657
002227	2011	2	1.5	3.86271	Electrical machinery and equipment manufacturing		20.3828	0.0226908	2.63906	1.51922	0.137076	1.79176	0.557741	0.5	440000	0	0.146891	0.405465
002227	2012	2	0.875	3.84124	Electrical machinery and equipment manufacturing		20.4248	0.0317203	2.70805	1.26885	0.151877	1.79176	0.557498	0.25	440000	0	0.108237	0.405465
002227	2013	2	1.5	3.82497	Electrical machinery and equipment manufacturing		20.546	0.059437	2.77259	1.60614	0.181455	1.94591	0.548021	0.428571	440000	0	0.0671393	0.356695
002227	2014	1	1	3.9562	Electrical machinery and equipment manufacturing		20.6916	0.0804566	2.83321	1.69911	0.191175	1.94591	0.516007	0.428571	440000	0	0.0788586	0.356695
002227	2015	2	1.5	3.94645	Electrical machinery and equipment manufacturing		20.7327	0.00865972	2.89037	2.28276	0.206413	1.94591	0.511604	0.428571	440000	0	0.186412	0.356695
002227	2017	5	1.7	3.92632	Electrical machinery and equipment manufacturing		20.7915	0.0138839	2.99573	1.60664	0.219368	1.94591	0.503483	0.571429	440000	0	0.142285	0.356695
002227	2018	2	0.875	3.86574	Electrical machinery and equipment manufacturing		20.8421	0.00917678	3.04452	1.18409	0.244787	1.94591	0.503483	0.571429	440000	0	0.106483	0.356695
002227	2019	2	1.5	3.93168	Electrical machinery and equipment manufacturing		20.9695	0.00938532	3.09104	1.18398	0.306281	1.94591	0.503483	0.6	440000	0	0.103425	0.356695
002227	2020	2	1.5	4.01062	Electrical machinery and equipment manufacturing		21.0187	0.00439295	3.13549	1.35357	0.327976	1.94591	0.49186	0.5	440000	0	0.111598	0.356695
002227	2021	1	1	3.89089	Electrical machinery and equipment manufacturing		21.25	-0.0202519	3.17805	1.28772	0.282254	1.94591	0.455165	0.5	440000	0	0	0.356695
002227	2022	1	1	3.87346	Electrical machinery and equipment manufacturing		21.1646	-0.0264826	3.21888	1.18522	0.256376	1.94591	0.450885	0.5	440000	0	0	0.356695
002227	2023	1	1	3.87058	Electrical machinery and equipment manufacturing		21.156	-0.0287014	3.2581	1.24169	0.272495	1.94591	0.432743	0.75	440000	0	0.11649	0.356695
002242	2017	1	1	3.82721	Electrical machinery and equipment manufacturing		22.4005	0.124582	2.77259	1.32519	0.28557	2.19722	0.544041	0	370000	0	0	0.287657
002242	2018	1	1	3.88811	Electrical machinery and equipment manufacturing		22.6194	0.105584	2.83321	1.18195	0.354139	2.19722	0.556644	0	370000	0	0	0.287657
002242	2019	1	1	3.84356	Electrical machinery and equipment manufacturing		22.7339	0.102464	2.89037	1.40398	0.403939	2.19722	0.575238	0	370000	0	0	0.287657
002242	2022	1	1	4.04378	Electrical machinery and equipment manufacturing		22.6798	0.0712555	3.04452	1.19823	0.425145	1.79176	0.565427	0	370000	0	0.285907	0.405465
002242	2023	2	1.5	3.97069	Electrical machinery and equipment manufacturing		22.753	0.0500336	3.09104	1.0372	0.433088	1.79176	0.55176	0	370000	0	0.0235471	0.405465
002249	2011	1	1	3.44085	Electrical machinery and equipment manufacturing		21.9772	0.0638531	1.79176	0.974808	0.231121	2.19722	0.508615	0.166667	440000	0	0.0966001	0.367694
002249	2012	1	1	3.3743	Electrical machinery and equipment manufacturing		22.0226	0.051683	1.94591	0.842109	0.253322	2.19722	0.511437	0	440000	0	0.264072	0.367694
002249	2013	1	1	3.54613	Electrical machinery and equipment manufacturing		22.246	0.0479686	2.07944	0.957102	0.334604	2.19722	0.510292	0	440000	0	0.0235416	0.367694
002249	2014	2	1.5	3.63501	Electrical machinery and equipment manufacturing		22.563	0.0523306	2.19722	0.901747	0.331544	2.19722	0.539075	0	440000	0	0	0.367694
002249	2015	2	1.5	3.78694	Electrical machinery and equipment manufacturing		22.7522	0.0477644	2.30259	1.19763	0.401491	2.19722	0.534843	0	440000	0	0.0493318	0.367694
002249	2016	4	1.594	3.83385	Electrical machinery and equipment manufacturing		23.3983	0.0370968	2.3979	0.836247	0.327249	2.19722	0.415435	0	440000	0	0.0569955	0.367694
002249	2017	2	1.5	3.80165	Electrical machinery and equipment manufacturing		23.5605	0.0259603	2.48491	0.80229	0.360437	2.19722	0.415057	0	440000	0	0.0222875	0.367694
002249	2018	2	1.5	3.82506	Electrical machinery and equipment manufacturing		23.4017	-0.179828	2.56495	0.715415	0.432453	2.19722	0.406209	0	440000	0	0.0533602	0.367694
002249	2019	1	1	3.87677	Electrical machinery and equipment manufacturing		23.3463	0.00228242	2.63906	0.738956	0.387075	2.19722	0.372797	0	440000	0	0.0564404	0.367694
002249	2020	1	1	3.94526	Electrical machinery and equipment manufacturing		23.3525	0.00571227	2.70805	0.743595	0.320295	2.19722	0.343146	0	440000	0	0.270638	0.367694
002249	2021	2	1.5	3.81211	Electrical machinery and equipment manufacturing		23.4415	0.0175958	2.77259	0.957181	0.377753	2.19722	0.324529	0.166667	440000	0	0.0116416	0.367694
002249	2022	1	1	3.83289	Electrical machinery and equipment manufacturing		23.442	0.0276356	2.83321	0.781556	0.3682	2.19722	0.318156	0.2	440000	0	0.0207951	0.367694
002260	2014	1	1	3.50324	Electrical machinery and equipment manufacturing		20.3561	0.0489346	2.19722	1.82694	0.395604	2.19722	0.406903	0	440000	0	0.168204	0.287657
002296	2012	2	0.875	3.71854	Computer, communication, and other electronic equipment manufacturing		20.848	0.0261054	2.48491	0.965449	0.307295	1.94591	0.399599	0.4	410000	0	0	0.356695
002296	2013	2	0.875	3.87239	Computer, communication, and other electronic equipment manufacturing		21.317	0.0446974	2.56495	0.956652	0.15794	1.94591	0.296677	0.4	410000	0	0	0.356695
002296	2015	2	0.875	3.82923	Computer, communication, and other electronic equipment manufacturing		21.4855	0.0343651	2.70805	1.52302	0.279645	1.60944	0.246042	0.4	410000	0	0	0.470004
002296	2018	1	1	4.07393	Computer, communication, and other electronic equipment manufacturing		21.4406	0.0166754	2.89037	0.785531	0.252878	1.60944	0.236892	0.5	410000	0	0.0621189	0.451967
002296	2019	1	1	3.92623	Computer, communication, and other electronic equipment manufacturing		21.3477	0.0346007	2.94444	0.983855	0.154375	1.60944	0.196476	0.5	410000	0	0.0841965	0.451967
002296	2020	1	1	3.95793	Computer, communication, and other electronic equipment manufacturing		21.4972	0.0384324	2.99573	0.883865	0.217342	1.60944	0.202157	0.6	410000	0	0.115669	0.451967
002296	2021	5	1.6	3.99248	Computer, communication, and other electronic equipment manufacturing		21.5492	0.0500636	3.04452	0.912634	0.245381	1.60944	0.202176	0.6	410000	0	0.0439567	0.451967
002296	2022	2	1.5	3.90709	Computer, communication, and other electronic equipment manufacturing		21.6212	0.040961	3.09104	0.891116	0.2304	1.60944	0.231623	0.6	410000	0	0.0753936	0.451967
002296	2023	2	1.5	3.92579	Electrical machinery and equipment manufacturing		21.6927	0.0600146	3.13549	0.878044	0.212232	1.60944	0.193888	0.4	410000	0	0.158339	0.451967
002298	2011	1	1	3.8829	Electrical machinery and equipment manufacturing		21.1032	0.0492661	2.63906	0.915833	0.475371	2.19722	0.480515	0.0833333	340000	0	0	0.287657
002300	2021	1	1	3.78093	Electrical machinery and equipment manufacturing		22.1997	0.0413849	3.3322	1.02842	0.453692	2.3979	0.474072	0.5	350000	0	0.165477	0.310128
002300	2023	1	1	3.91993	Electrical machinery and equipment manufacturing		22.5583	0.0276393	3.4012	0.959148	0.488321	2.3979	0.461935	0.454545	350000	0	0.353346	0.310128
002309	2012	1	1	3.82809	Electrical machinery and equipment manufacturing		23.2147	0.0246854	2.83321	0.737603	0.56104	2.07944	0.491562	0.166667	320000	0	0.176905	0.318454
002309	2013	1	1	3.71884	Electrical machinery and equipment manufacturing		23.4465	0.0166277	2.89037	0.778792	0.581731	2.19722	0.486678	0.2	320000	0	0.104808	0.287657
002309	2015	1	1	3.79508	Electrical machinery and equipment manufacturing		23.7825	0.0230134	2.99573	0.765977	0.551443	2.19722	0.432622	0	320000	0	0	0.287657
002322	2011	4	1.417	3.9146	Electrical machinery and equipment manufacturing		20.739	0.0758951	1.60944	1.0398	0.0675942	2.19722	0.424724	0.5	330000	0	0	0.287657
002322	2012	2	1.5	3.86051	Electrical machinery and equipment manufacturing		20.882	0.0860836	1.79176	1.04985	0.0488267	2.19722	0.389214	0.5	330000	0	0	0.287657
002322	2013	2	0.875	3.9383	Electrical machinery and equipment manufacturing		20.9803	0.0976699	1.94591	1.33508	0.0453048	2.19722	0.384381	0.571429	330000	0	0	0.287657
002322	2014	1	1	3.8694	Electrical machinery and equipment manufacturing		21.0011	0.0447408	2.07944	1.25973	0.0595629	2.19722	0.368223	0.571429	330000	0	0	0.287657
002322	2016	1	1	3.87702	Electrical machinery and equipment manufacturing		21.9054	0.0450234	2.30259	1.21923	0.0842784	2.19722	0.382718	0.125	330000	0	0.300593	0.287657
002334	2011	4	1.594	3.79888	Electrical machinery and equipment manufacturing		20.9873	0.0555487	2.30259	0.858605	0.0800439	2.19722	0.325432	0.5	440000	0	0.144761	0.287657
002334	2013	2	1.5	3.92416	Electrical machinery and equipment manufacturing		21.196	0.0697459	2.48491	1.22401	0.131282	2.19722	0.297324	0.636364	440000	0	0.065718	0.287657
002334	2014	1	1	3.97177	Electrical machinery and equipment manufacturing		21.3236	0.0841379	2.56495	1.22738	0.142234	2.19722	0.285654	0.636364	440000	0	0.0648035	0.287657
002334	2015	3	1.667	4.05369	Electrical machinery and equipment manufacturing		21.4339	0.0713515	2.63906	1.44939	0.158148	2.19722	0.274211	0.555556	440000	0	0.108566	0.287657
002334	2016	1	1	4.01513	Electrical machinery and equipment manufacturing		21.6723	0.0248667	2.70805	1.16785	0.291891	2.19722	0.265402	0.625	440000	0	0.0482254	0.287657
002335	2011	1	1	3.76144	Electrical machinery and equipment manufacturing		20.9204	0.085456	2.56495	0.877644	0.23295	1.94591	0.513554	0.333333	350000	0	0	0.356695
002335	2013	1	1	3.90476	Electrical machinery and equipment manufacturing		21.157	0.071262	2.70805	1.11344	0.279243	1.94591	0.523713	0.4	350000	0	0	0.356695
002335	2015	1	1	4.07232	Electrical machinery and equipment manufacturing		21.8781	0.0455759	2.83321	1.47897	0.419974	1.94591	0.519377	0.4	350000	0	0.136033	0.356695
002335	2016	3	1.667	3.97497	Electrical machinery and equipment manufacturing		22.3396	0.0322545	2.89037	1.14542	0.306446	1.94591	0.479165	0.333333	350000	0	0.172757	0.356695
002335	2017	4	1.75	4.01809	Electrical machinery and equipment manufacturing		22.5489	0.0685495	2.94444	0.967465	0.343674	1.94591	0.46624	0.0909091	350000	0	0	0.356695
002335	2018	8	1.836	4.02715	Electrical machinery and equipment manufacturing		22.7403	0.0120353	2.99573	0.729505	0.426332	1.94591	0.464775	0.0909091	350000	0	0.0476167	0.356695
002335	2019	8	1.836	4.03115	Electrical machinery and equipment manufacturing		22.7815	0.0272444	3.04452	0.743567	0.445085	1.94591	0.463072	0.1	350000	0	0	0.356695
002335	2020	5	1.8	4.09757	Electrical machinery and equipment manufacturing		22.843	0.0458336	3.09104	0.99362	0.457992	1.94591	0.417282	0.142857	350000	0	0.0897463	0.356695
002335	2022	1	1	3.96471	Electrical machinery and equipment manufacturing		23.0236	0.0261901	3.17805	1.29437	0.47473	1.94591	0.360226	0.125	350000	0	0.0995475	0.356695
002335	2023	1	1	3.975	Electrical machinery and equipment manufacturing		23.1971	0.0429479	3.21888	0.957387	0.482429	1.94591	0.350611	0.142857	350000	0	0.0488999	0.356695
002339	2012	2	1.5	3.96007	Electrical machinery and equipment manufacturing		21.0476	0.0801415	2.56495	0.980358	0.258597	2.19722	0.227162	0.833333	370000	0	0.0324809	0.287657
002339	2013	2	0.875	3.82955	Electrical machinery and equipment manufacturing		21.2215	0.0723118	2.63906	0.993749	0.191536	2.19722	0.209382	0.714286	370000	0	0	0.287657
002339	2014	4	1.594	3.95992	Electrical machinery and equipment manufacturing		21.4128	0.0684229	2.70805	1.12029	0.254415	2.19722	0.198405	0.714286	370000	0	0	0.287657
002339	2015	8	1.767	4.01389	Electrical machinery and equipment manufacturing		21.5752	0.0672174	2.77259	1.51663	0.2847	2.19722	0.192125	0.714286	370000	0	0.04126	0.287657
002339	2016	14	1.811	3.96461	Electrical machinery and equipment manufacturing		21.795	0.0350836	2.83321	1.24354	0.360769	2.19722	0.190663	0.666667	370000	0	0	0.287657
002339	2017	12	1.781	4.12827	Electrical machinery and equipment manufacturing		22.0046	0.027233	2.89037	0.853051	0.379224	2.19722	0.184116	0.666667	370000	0	0	0.287657
002339	2018	8	1.804	3.92321	Electrical machinery and equipment manufacturing		22.0454	0.023965	2.94444	0.735001	0.378432	2.19722	0.192444	0.666667	370000	0	0.0315285	0.287657
002339	2019	8	1.673	4.0859	Electrical machinery and equipment manufacturing		21.9997	0.0196556	2.99573	0.830828	0.362693	2.19722	0.233089	0.571429	370000	0	0	0.287657
002339	2020	1	1	4.11401	Electrical machinery and equipment manufacturing		22.0476	0.0174696	3.04452	0.824715	0.366482	2.19722	0.235167	0.5	370000	0	0.0844383	0.287657
002339	2021	2	0.875	4.05721	Electrical machinery and equipment manufacturing		22.0532	-0.00784419	3.09104	0.930021	0.374378	2.19722	0.238497	0.5	370000	0	0.0125693	0.287657
002339	2022	3	1.16	3.95974	Electrical machinery and equipment manufacturing		22.0771	0.00199945	3.13549	0.858759	0.383081	2.19722	0.229723	0.666667	370000	0	0.0249452	0.287657
002339	2023	2	1.5	4.02259	Electrical machinery and equipment manufacturing		22.1626	0.0181573	3.17805	0.852584	0.403013	2.19722	0.221771	0.571429	370000	0	0.0218923	0.287657
002350	2012	3	1.074	3.994	Electrical machinery and equipment manufacturing		21.1212	0.0563218	2.99573	0.893764	0.27287	2.19722	0.553424	0.333333	110000	0	0.0393752	0.287657
002350	2014	2	1.5	3.96949	Electrical machinery and equipment manufacturing		21.2613	0.0439663	3.09104	1.06613	0.294042	2.19722	0.482577	0.428571	110000	0	0.0358719	0.287657
002350	2015	2	0.875	3.96499	Electrical machinery and equipment manufacturing		21.382	0.0218479	3.13549	1.30592	0.336433	2.19722	0.470151	0.428571	110000	0	0.021341	0.287657
002350	2018	1	1	3.86003	Electrical machinery and equipment manufacturing		21.9959	0.0294906	3.2581	0.84516	0.397578	2.19722	0.409832	0.428571	110000	0	0.0122221	0.287657
002350	2019	3	1.389	3.90815	Electrical machinery and equipment manufacturing		21.9416	0.0288104	3.29584	0.802898	0.349023	2.19722	0.407419	0.428571	110000	0	0.012739	0.287657
002350	2020	5	1.6	3.87121	Electrical machinery and equipment manufacturing		21.9224	0.0195515	3.3322	0.873235	0.319617	2.19722	0.396373	0.5	110000	0	0.0120833	0.287657
002350	2021	2	0.875	3.91653	Electrical machinery and equipment manufacturing		21.9624	0.0337898	3.3673	1.00515	0.332863	2.30259	0.357244	0.5	110000	0	0.273291	0.262364
002350	2022	2	0.875	3.886	Electrical machinery and equipment manufacturing		21.9335	0.00460084	3.4012	0.909669	0.349672	2.19722	0.348627	0.4	110000	0	0.182849	0.287657
002350	2023	2	0.875	3.90218	Electrical machinery and equipment manufacturing		21.7388	-0.0687553	3.43399	0.98371	0.311177	2.19722	0.348957	0.166667	110000	0	0.218125	0.287657
002358	2012	1	1	3.8807	Electrical machinery and equipment manufacturing		21.2779	0.105683	2.56495	0.922745	0.293273	2.19722	0.567045	0.571429	410000	0	0	0.287657
002358	2014	3	1.074	3.84187	Electrical machinery and equipment manufacturing		22.0761	0.0668013	2.70805	1.27248	0.374235	2.07944	0.48976	0.625	410000	0	0	0.318454
002358	2015	2	0.875	4.00138	Electrical machinery and equipment manufacturing		22.2548	0.036527	2.77259	1.46966	0.421974	2.07944	0.477887	0.571429	410000	0	0.21671	0.318454
002358	2016	1	1	3.91932	Electrical machinery and equipment manufacturing		22.7352	0.0415109	2.83321	1.24821	0.331325	2.19722	0.438902	0.428571	410000	0	0.150831	0.287657
002358	2019	7	1.539	4.01845	Electrical machinery and equipment manufacturing		22.8117	0.00167272	2.99573	0.805349	0.362837	2.3979	0.393884	0.375	410000	0	0.281128	0.310128
002358	2020	3	1.389	3.98099	Electrical machinery and equipment manufacturing		22.6741	-0.151263	3.04452	0.748334	0.402818	2.3979	0.367728	0.3	410000	0	0.179763	0.374662
002358	2023	1	1	3.86997	Electrical machinery and equipment manufacturing		22.5711	0.0115737	3.17805	0.75978	0.405844	2.30259	0.299059	0.2	410000	1	0.0650354	0.336472
002364	2014	1	1	3.87617	Electrical machinery and equipment manufacturing		20.9108	0.0991294	2.63906	1.40592	0.184747	2.07944	0.44065	0.2	330000	0	0.0465417	0.318454
002364	2017	2	0.875	4.0617	Electrical machinery and equipment manufacturing		21.7065	0.0217948	2.83321	1.1464	0.106833	2.19722	0.40966	0.2	330000	0	0	0.287657
002364	2019	1	1	4.10515	Electrical machinery and equipment manufacturing		21.6967	0.0273513	2.94444	1.25462	0.169214	2.19722	0.394877	0.166667	330000	0	0	0.287657
002364	2020	1	1	4.10488	Electrical machinery and equipment manufacturing		21.9611	0.0228245	2.99573	1.01674	0.30196	2.07944	0.379431	0.166667	330000	0	0	0.318454
002364	2022	2	1.5	4.0114	Electrical machinery and equipment manufacturing		21.9092	-0.0174079	3.09104	0.905588	0.27153	1.94591	0.37739	0.4	330000	0	0.125583	0.356695
002364	2023	1	1	3.94038	Electrical machinery and equipment manufacturing		21.9178	0.0127772	3.13549	0.956476	0.257925	1.94591	0.360546	0.5	330000	0	0.165881	0.356695
002491	2016	1	1	4.08067	Electrical machinery and equipment manufacturing		22.6314	0.0804918	2.89037	1.44044	0.440292	2.19722	0.397479	0.285714	320000	0	0	0.287657
002491	2017	1	1	4.09727	Electrical machinery and equipment manufacturing		22.881	0.0670877	2.94444	1.16086	0.380344	2.19722	0.393121	0.428571	320000	0	0.060846	0.287657
002491	2018	2	1.5	4.08062	Electrical machinery and equipment manufacturing		23.0472	0.040633	2.99573	0.896094	0.411726	2.19722	0.377761	0.4	320000	0	0.135341	0.287657
002491	2019	4	1.75	3.98525	Electrical machinery and equipment manufacturing		22.8621	-0.268234	3.04452	0.953624	0.504329	2.19722	0.377291	0.375	320000	0	0.0936839	0.287657
002491	2020	2	1.5	4.05813	Electrical machinery and equipment manufacturing		22.8202	0.00577015	3.09104	0.814681	0.500396	2.19722	0.37102	0.333333	320000	0	0.25282	0.287657
002491	2021	2	1.5	4.08452	Electrical machinery and equipment manufacturing		22.5492	-0.103442	3.13549	0.958987	0.502813	2.19722	0.373171	0.285714	320000	0	0.10341	0.287657
002491	2023	1	1	4.00415	Electrical machinery and equipment manufacturing		22.4962	0.0394915	3.21888	0.972376	0.456723	2.19722	0.370816	0	320000	0	0.150408	0.287657
002498	2017	1	1	3.86694	Electrical machinery and equipment manufacturing		22.5518	0.0394893	2.3979	1.10662	0.227418	2.19722	0.53761	0.3	370000	0	0.186673	0.287657
002498	2018	3	1.389	3.80179	Electrical machinery and equipment manufacturing		22.6169	0.0327348	2.48491	0.828046	0.256434	2.19722	0.535848	0.333333	370000	0	0.139619	0.287657
002498	2019	1	1	3.80344	Electrical machinery and equipment manufacturing		22.5732	0.0662635	2.56495	1.02245	0.186718	2.19722	0.533407	0.3	370000	0	0.109536	0.287657
002498	2020	4	1.594	3.83356	Electrical machinery and equipment manufacturing		22.7399	0.0747422	2.63906	1.12653	0.220938	2.19722	0.514798	0.333333	370000	0	0.215447	0.287657
002498	2021	3	1.667	3.92206	Electrical machinery and equipment manufacturing		22.9555	0.079515	2.70805	1.14643	0.263642	2.19722	0.521813	0.333333	370000	0	0.220788	0.287657
002498	2022	4	1.465	3.90197	Electrical machinery and equipment manufacturing		23.0113	0.0759578	2.77259	0.986474	0.23962	2.19722	0.519781	0.454545	370000	0	0.241645	0.287657
002498	2023	3	1.389	3.87385	Electrical machinery and equipment manufacturing		23.0666	0.0696257	2.83321	0.927436	0.223489	2.19722	0.521678	0.4	370000	0	0.144536	0.287657
002506	2015	3	1.16	3.78619	Computer, communication, and other electronic equipment manufacturing		23.4169	0.0423026	2.56495	1.23539	0.563997	2.19722	0.517213	0.333333	310000	0	0.35171	0.287657
002506	2016	8	1.578	3.7336	Computer, communication, and other electronic equipment manufacturing		23.7353	-0.00164159	2.63906	0.948681	0.584548	2.19722	0.517213	0	310000	0	0.319961	0.287657
002506	2017	5	1.373	3.68294	Computer, communication, and other electronic equipment manufacturing		23.7348	0.00182299	2.70805	0.886613	0.583962	2.07944	0.500351	0	310000	0	0.304095	0.318454
002506	2018	4	1.234	3.90844	Computer, communication, and other electronic equipment manufacturing		23.6584	0.00299634	2.77259	0.93874	0.572233	2.19722	0.497348	0	310000	0	0.203956	0.287657
002506	2019	3	1.074	3.79272	Computer, communication, and other electronic equipment manufacturing		23.4985	0.00433089	2.83321	1.27855	0.544113	2.19722	0.403245	0	310000	0	0.267645	0.287657
002506	2020	2	0.875	3.8429	Computer, communication, and other electronic equipment manufacturing		23.3479	-0.211139	2.89037	1.17887	0.523109	1.94591	0.364545	0	310000	0	0.21664	0.356695
002506	2021	3	1.16	3.87216	Computer, communication, and other electronic equipment manufacturing		22.9533	-0.235492	2.94444	1.42003	0.55794	2.19722	0.313776	0	310000	0	0.137627	0.287657
002506	2022	4	1.437	3.77206	Computer, communication, and other electronic equipment manufacturing		23.0438	0.00559549	2.99573	1.23848	0.575742	2.19722	0.294462	0	310000	0	0.0652334	0.287657
002508	2018	3	1.667	3.72063	Electrical machinery and equipment manufacturing		22.9698	0.145772	2.94444	1.21105	0.30129	2.19722	0.495543	0.4	330000	0	0	0.287657
002508	2019	1	1	3.85646	Electrical machinery and equipment manufacturing		23.089	0.141104	2.99573	1.46382	0.296584	2.19722	0.515016	0.4	330000	0	0	0.287657
002508	2020	1	1	3.907	Electrical machinery and equipment manufacturing		23.2456	0.127028	3.04452	1.48443	0.294358	2.19722	0.507793	0.4	330000	0	0	0.287657
002508	2022	1	1	3.97062	Electrical machinery and equipment manufacturing		23.434	0.0985884	3.13549	1.12567	0.29604	2.19722	0.487753	0.5	330000	0	0	0.287657
002518	2012	1	1	3.8551	Electrical machinery and equipment manufacturing		21.2244	0.0540457	2.99573	0.745202	0.189486	1.94591	0.549131	0.333333	440000	0	0.0750258	0.451967
002518	2013	1	1	3.85202	Electrical machinery and equipment manufacturing		21.4375	0.0615701	3.04452	1.15373	0.260603	1.94591	0.546826	0.2	440000	0	0.0802516	0.356695
002518	2015	2	0.875	3.96618	Electrical machinery and equipment manufacturing		21.6494	0.0873734	3.13549	1.66238	0.262677	1.94591	0.529227	0.166667	440000	0	0.0608584	0.356695
002518	2016	1	1	3.99796	Electrical machinery and equipment manufacturing		21.7606	0.101083	3.17805	1.51455	0.256528	1.94591	0.520168	0.142857	440000	0	0.110386	0.356695
002518	2017	2	1.5	3.94169	Electrical machinery and equipment manufacturing		22.0625	0.0928872	3.21888	1.33922	0.340341	1.94591	0.532548	0.142857	440000	0	0.115491	0.356695
002518	2018	2	0.875	3.96331	Electrical machinery and equipment manufacturing		21.9879	0.063331	3.2581	0.908166	0.274052	1.94591	0.52726	0.166667	440000	0	0.186811	0.356695
002518	2019	2	1.5	4.06737	Electrical machinery and equipment manufacturing		22.1237	0.0763054	3.29584	1.04631	0.302239	1.94591	0.529351	0.4	440000	0	0.116123	0.356695
002518	2020	3	1.16	3.99194	Electrical machinery and equipment manufacturing		22.1426	0.0709784	3.3322	1.07964	0.277309	1.94591	0.531097	0.333333	440000	0	0.12857	0.356695
002518	2021	2	0.875	3.91969	Electrical machinery and equipment manufacturing		22.3228	0.0725236	3.3673	1.44881	0.317161	1.94591	0.530711	0.2	440000	0	0.0931013	0.356695
002527	2011	1	1	3.71124	Electrical machinery and equipment manufacturing		21.0245	0.0831016	2.83321	0.905634	0.064297	2.19722	0.42852	0.2	310000	0	0.0848325	0.287657
002527	2012	2	1.5	3.94406	Electrical machinery and equipment manufacturing		21.2104	0.0833106	2.89037	0.826746	0.118727	2.19722	0.417183	0.166667	310000	0	0.105874	0.287657
002527	2013	1	1	4.09753	Electrical machinery and equipment manufacturing		21.3003	0.0939474	2.94444	0.963246	0.119961	2.07944	0.409156	0.166667	310000	0	0.108993	0.318454
002527	2014	3	1.667	4.08864	Electrical machinery and equipment manufacturing		21.6294	0.0789264	2.99573	1.09514	0.161442	2.19722	0.365039	0.375	310000	0	0.0958588	0.287657
002527	2015	2	0.875	4.18256	Electrical machinery and equipment manufacturing		21.9509	0.0546076	3.04452	1.36188	0.295497	2.19722	0.349526	0.428571	310000	0	0.0215433	0.287657
002527	2016	2	0.875	4.15022	Electrical machinery and equipment manufacturing		22.2135	0.0375049	3.09104	1.01048	0.327286	2.19722	0.33496	0.285714	310000	0	0.0911239	0.287657
002527	2017	2	0.875	4.09378	Electrical machinery and equipment manufacturing		22.5577	0.0217493	3.13549	0.839221	0.421721	2.19722	0.33496	0.5	310000	0	0.233798	0.287657
002527	2018	2	1.5	4.19747	Electrical machinery and equipment manufacturing		22.6159	-0.0455776	3.17805	0.697515	0.413461	2.19722	0.331587	0.3	310000	0	0.188141	0.287657
002527	2019	2	1.5	4.17264	Electrical machinery and equipment manufacturing		22.5729	0.00948053	3.21888	0.692836	0.400024	2.19722	0.326914	0.444444	310000	0	0.167033	0.287657
002527	2020	3	1.389	4.20912	Electrical machinery and equipment manufacturing		22.5257	0.0151953	3.2581	0.721489	0.378188	2.19722	0.326906	0.25	310000	0	0.0913738	0.287657
002527	2021	2	1.5	4.17579	Electrical machinery and equipment manufacturing		22.5885	0.0258633	3.29584	0.80073	0.361118	2.19722	0.310106	0.25	310000	0	0	0.287657
002527	2022	2	1.5	4.11251	Electrical machinery and equipment manufacturing		22.5116	-0.195061	3.3322	0.825858	0.520405	2.19722	0.308808	0.375	310000	0	0.0888684	0.287657
002527	2023	7	1.713	4.05036	General equipment manufacturing		22.177	-0.0927133	3.3673	1.07282	0.495932	2.19722	0.309476	0.333333	310000	0	0.0743995	0.287657
002533	2012	1	1	3.77511	Electrical machinery and equipment manufacturing		21.602	0.0467624	2.19722	0.714272	0.183429	2.30259	0.341008	0.5	430000	0	0.0305461	0.336472
002533	2016	1	1	3.79786	Electrical machinery and equipment manufacturing		21.8632	0.0537685	2.56495	1.08169	0.200334	2.19722	0.293653	0.6	430000	0	0.163128	0.287657
002533	2019	2	0.875	3.9105	Electrical machinery and equipment manufacturing		22.2528	0.0448846	2.77259	0.714841	0.359888	2.19722	0.288634	0.4	430000	0	0.229921	0.287657
002533	2021	3	1.389	3.89714	Electrical machinery and equipment manufacturing		22.7223	0.0472509	2.89037	0.826125	0.400602	2.19722	0.360938	0.285714	430000	0	0.123553	0.287657
002533	2022	1	1	3.96882	Electrical machinery and equipment manufacturing		22.757	0.0532821	2.94444	0.717897	0.392112	2.19722	0.332532	0.285714	430000	0	0.183486	0.287657
002533	2023	2	0.875	3.95769	Electrical machinery and equipment manufacturing		22.9129	0.0641213	2.99573	0.768943	0.418887	2.07944	0.311956	0.25	430000	0	0.0661325	0.318454
002543	2022	1	1	4.05434	Electrical machinery and equipment manufacturing		22.6534	0.0767293	2.99573	0.808415	0.317254	1.94591	0.524096	0.4	440000	0	0.213317	0.356695
002546	2011	2	0.875	3.84507	Electrical machinery and equipment manufacturing		20.8594	0.108328	2.19722	0.891055	0.10449	2.07944	0.539913	0.666667	320000	0	0	0.318454
002546	2012	1	1	3.85559	Electrical machinery and equipment manufacturing		21.012	0.121538	2.30259	0.887012	0.127824	2.19722	0.539913	0.428571	320000	0	0.149397	0.287657
002546	2014	2	1.5	3.8514	Electrical machinery and equipment manufacturing		21.2779	0.0857847	2.48491	1.09383	0.182608	2.19722	0.490449	0.5	320000	0	0.256132	0.287657
002546	2015	3	1.667	3.90795	Electrical machinery and equipment manufacturing		21.3376	0.0848183	2.56495	1.68663	0.181527	2.19722	0.49063	0.5	320000	0	0.240137	0.287657
002546	2016	3	1.074	4.05368	Electrical machinery and equipment manufacturing		21.879	0.0298624	2.63906	1.15038	0.093605	2.19722	0.424598	0.5	320000	0	0.250918	0.287657
002546	2017	3	1.389	4.05143	Electrical machinery and equipment manufacturing		21.937	0.0322169	2.70805	0.857155	0.112482	2.19722	0.417104	0.5	320000	0	0.272146	0.287657
002546	2018	6	1.604	3.97914	Electrical machinery and equipment manufacturing		21.9483	0.0447626	2.77259	0.716282	0.118907	2.19722	0.42675	0.5	320000	0	0.174484	0.287657
002546	2019	3	1.389	4.04871	Electrical machinery and equipment manufacturing		21.9595	0.0471749	2.83321	0.7484	0.10987	2.19722	0.408804	0.333333	320000	0	0.138919	0.287657
002546	2020	1	1	4.01788	Electrical machinery and equipment manufacturing		21.9791	0.0504017	2.89037	0.727112	0.0791656	2.19722	0.388489	0.2	320000	0	0	0.287657
002546	2021	2	1.5	3.92152	Electrical machinery and equipment manufacturing		22.0081	0.0592703	2.94444	0.715821	0.0762867	2.19722	0.374728	0.2	320000	0	0.0785068	0.287657
002546	2022	1	1	3.91632	Electrical machinery and equipment manufacturing		22.0109	0.00237144	2.99573	0.66634	0.10087	1.94591	0.373759	0.333333	320000	0	0.0813677	0.356695
002546	2023	1	1	3.94701	Instrumentation manufacturing		21.9933	0.0165284	3.04452	0.816445	0.0972307	1.94591	0.372085	0.333333	320000	0	0.107876	0.356695
002606	2011	1	1	3.61645	Electrical machinery and equipment manufacturing		20.9747	0.040792	2.19722	0.811289	0.375967	2.48491	0.460584	0.111111	210000	0	0.280158	0.287657
002606	2023	6	1.535	3.84264	Electrical machinery and equipment manufacturing		21.5631	0.0219063	3.04452	1.02572	0.281048	2.19722	0.288698	0	210000	0	0.130138	0.287657
002610	2019	2	0.875	3.78518	Electrical machinery and equipment manufacturing		23.1782	-0.154674	2.63906	0.815611	0.498964	2.19722	0.217648	0	320000	0	0	0.287657
002610	2020	2	0.875	3.74681	Electrical machinery and equipment manufacturing		22.9843	0.00307316	2.70805	1.12581	0.452906	2.19722	0.192678	0	320000	0	0.197002	0.287657
002610	2021	4	1.465	3.8599	Electrical machinery and equipment manufacturing		22.931	-0.0472626	2.77259	1.34905	0.461633	2.19722	0.139555	0	320000	0	0.258091	0.287657
002610	2022	5	1.6	3.68376	Electrical machinery and equipment manufacturing		23.1709	-0.074221	2.83321	1.03774	0.543832	2.3979	0.0819633	0	320000	0	0.20702	0.310128
002610	2023	3	1.25	3.68559	Electrical machinery and equipment manufacturing		23.0673	-0.0897252	2.89037	0.995386	0.575544	2.3979	0.0764693	0	330000	0	0.112955	0.310128
002614	2012	1	1	3.42019	Electrical machinery and equipment manufacturing		21.7086	0.0100057	2.83321	0.701685	0.226998	2.19722	0.536099	0	350000	0	0.0938114	0.287657
002614	2016	4	1.75	3.79057	Special equipment manufacturing		22.2044	0.0586375	3.04452	0.946075	0.349624	2.19722	0.492234	0	350000	0	0.134566	0.287657
002614	2017	3	1.667	3.94219	Special equipment manufacturing		22.2978	0.0710318	3.09104	1.06157	0.33457	2.19722	0.508389	0.142857	350000	0	0.186936	0.287657
002614	2018	2	1.5	3.88718	Special equipment manufacturing		22.5054	0.0718688	3.13549	0.934977	0.369783	2.19722	0.484848	0.142857	350000	0	0.158099	0.287657
002614	2019	1	1	3.97286	Special equipment manufacturing		22.5385	0.0445971	3.17805	0.809974	0.369739	2.19722	0.462274	0.142857	350000	0	0.333203	0.287657
002614	2020	1	1	3.90239	Electrical machinery and equipment manufacturing		22.9163	0.048208	3.21888	0.813016	0.38633	2.19722	0.411698	0.142857	350000	0	0.457751	0.287657
002614	2021	4	1.465	3.85436	Electrical machinery and equipment manufacturing		22.9495	0.0494669	3.2581	0.80317	0.371994	2.19722	0.387397	0	350000	0	0.231556	0.287657
002614	2022	2	0.875	3.98721	Electrical machinery and equipment manufacturing		22.8875	0.0126903	3.29584	0.732853	0.369179	2.19722	0.346494	0	350000	0	0.200066	0.287657
002614	2023	1	1	3.84116	Electrical machinery and equipment manufacturing		22.8051	0.0141634	3.3322	0.696328	0.354817	2.19722	0.370601	0	350000	0	0.16961	0.287657
002638	2012	1	1	3.38108	Electrical machinery and equipment manufacturing		21.8188	0.0343931	2.94444	0.866179	0.251126	1.94591	0.31764	0.142857	440000	0	0	0.356695
002638	2015	1	1	3.6698	Electrical machinery and equipment manufacturing		21.8991	0.00836682	3.09104	1.24532	0.264811	1.79176	0.290864	0	440000	0	0.103505	0.287657
002638	2016	1	1	3.54717	Electrical machinery and equipment manufacturing		22.6923	-0.0600264	3.13549	1.01627	0.251876	1.79176	0.363225	0	440000	0	0.260417	0.287657
002638	2019	2	1.5	3.76924	Electrical machinery and equipment manufacturing		22.2198	-0.0856464	3.2581	0.830695	0.184469	2.19722	0.363209	0	440000	0	0.195323	0.287657
002638	2023	1	1	3.69557	Electrical machinery and equipment manufacturing		21.75	-0.0213904	3.4012	0.903019	0.0932632	2.19722	0.349724	0	440000	0	0.0311795	0.287657
002665	2016	3	1.074	3.75891	Electrical machinery and equipment manufacturing		22.2207	0.0326886	2.77259	1.4994	0.269463	2.19722	0.405823	0.444444	110000	0	0	0.287657
002665	2017	4	1.234	3.85266	Electrical machinery and equipment manufacturing		22.9496	0.0100186	2.83321	0.961017	0.166167	2.19722	0.351335	0.444444	110000	0	0	0.287657
002665	2020	1	1	3.83937	Electrical machinery and equipment manufacturing		22.8073	-0.117352	2.99573	0.673669	0.250327	2.19722	0.268782	0.454545	620000	0	0.0321985	0.287657
002665	2022	2	1.5	3.7063	Electrical machinery and equipment manufacturing		22.757	-0.0351096	3.09104	0.914386	0.274077	2.19722	0.164057	0	620000	0	0.041023	0.287657
002665	2023	1	1	3.81708	Electrical machinery and equipment manufacturing		22.8038	-0.0401198	3.13549	0.778059	0.326381	2.19722	0.164457	0	620000	0	0	0.287657
002677	2016	1	1	3.83529	Electrical machinery and equipment manufacturing		21.058	0.135405	2.77259	1.38302	0.162479	2.19722	0.52535	0.2	330000	0	0.200267	0.287657
002692	2015	1	1	3.36552	Electrical machinery and equipment manufacturing		21.894	0.0451688	2.70805	1.0654	0.424159	1.94591	0.524128	0.285714	320000	0	0.157707	0.356695
002692	2018	1	1	3.40574	Electrical machinery and equipment manufacturing		21.7922	-0.159295	2.89037	0.962148	0.492104	1.94591	0.479312	0.142857	320000	0	0.350155	0.356695
002706	2015	2	0.875	3.3588	Electrical machinery and equipment manufacturing		20.9321	0.096715	2.83321	1.24972	0.231621	2.19722	0.302317	0.25	310000	0	0	0.287657
002706	2018	1	1	3.72048	Electrical machinery and equipment manufacturing		21.4963	0.0975423	2.99573	1.09272	0.172047	2.07944	0.280373	0.111111	310000	0	0	0.318454
002706	2019	2	1.5	3.63933	Electrical machinery and equipment manufacturing		21.569	0.110847	3.04452	1.26415	0.20256	2.07944	0.280445	0.111111	310000	0	0	0.318454
002706	2020	4	1.75	3.828	Electrical machinery and equipment manufacturing		21.9053	0.10898	3.09104	1.96566	0.318463	2.07944	0.280532	0.142857	310000	0	0	0.318454
002706	2021	2	1.5	3.76919	Electrical machinery and equipment manufacturing		22.2091	0.0904948	3.13549	1.56252	0.405955	2.19722	0.302869	0.375	310000	0	0.118187	0.287657
002706	2022	5	1.8	3.91653	Electrical machinery and equipment manufacturing		22.4645	0.0713297	3.17805	1.2812	0.295487	2.07944	0.301325	0.428571	310000	0	0.0969281	0.318454
002706	2023	6	1.764	3.89428	Electrical machinery and equipment manufacturing		22.4845	0.0841599	3.21888	1.03174	0.254232	2.19722	0.282885	0.5	310000	0	0.06152	0.287657
002723	2015	1	1	3.4305	Electrical machinery and equipment manufacturing		20.7052	0.0423477	2.19722	1.17226	0.287227	1.94591	0.539263	0	440000	0	0	0.356695
002724	2014	3	1.074	3.47011	Electrical machinery and equipment manufacturing		21.2985	0.0921697	2.99573	0.942349	0.127927	2.56495	0.587389	0	440000	0	0.171738	0.325411
002724	2015	3	1.074	3.64075	Electrical machinery and equipment manufacturing		21.2908	0.0374051	3.04452	1.04238	0.122514	2.56495	0.590372	0.333333	440000	0	0.326341	0.325411
002724	2016	2	0.875	3.58593	Electrical machinery and equipment manufacturing		21.3571	0.0573446	3.09104	1.0203	0.126203	2.56495	0.584867	0.5	440000	0	0.380883	0.325411
002724	2017	2	0.875	3.62561	Electrical machinery and equipment manufacturing		21.4469	0.0711069	3.13549	1.05406	0.135045	2.48491	0.584867	0.5	440000	0	0.451985	0.34833
002724	2018	2	0.875	3.78499	Electrical machinery and equipment manufacturing		21.5077	0.083138	3.17805	0.871201	0.125278	2.56495	0.584867	0.5	440000	0	0.197211	0.325411
002724	2019	3	1.074	3.80908	Electrical machinery and equipment manufacturing		21.6143	0.10035	3.21888	0.947092	0.13547	2.56495	0.584867	0.5	440000	0	0.186761	0.325411
002724	2020	2	0.875	3.64686	Electrical machinery and equipment manufacturing		21.9284	0.0955278	3.2581	0.869169	0.152735	2.3979	0.562074	0.5	440000	0	0.187772	0.310128
002724	2021	7	1.509	3.74021	Electrical machinery and equipment manufacturing		22.0564	0.106025	3.29584	1.15808	0.158594	2.3979	0.551077	1	440000	0	0.0928418	0.310128
002724	2022	16	1.781	3.8181	Electrical machinery and equipment manufacturing		22.0752	0.0360829	3.3322	0.814291	0.179541	2.30259	0.54974	0.5	440000	0	0.105376	0.336472
002724	2023	15	1.752	3.74537	Electrical machinery and equipment manufacturing		22.0879	0.00274921	3.3673	0.960687	0.187534	2.3979	0.540409	0.2	440000	0	0.102115	0.310128
002745	2016	1	1	3.37308	Computer, communication, and other electronic equipment manufacturing		23.3568	0.034271	2.99573	0.764323	0.478673	1.94591	0.589866	0.2	440000	0	0.182823	0.356695
002745	2020	1	1	3.83945	Electrical machinery and equipment manufacturing		24.15	0.00981031	3.17805	0.780902	0.46569	2.07944	0.482179	0.2	440000	0	0.0131253	0.318454
002745	2022	1	1	3.76249	Electrical machinery and equipment manufacturing		23.9391	0.00790463	3.2581	0.674295	0.378017	1.79176	0.415984	0.2	440000	0	0.0452976	0.287657
002745	2023	1	1	3.78699	Electrical machinery and equipment manufacturing		23.9163	0.0183231	3.29584	0.680185	0.360287	1.79176	0.411278	0.2	440000	0	0.0206739	0.287657
002851	2017	1	1	3.83662	Electrical machinery and equipment manufacturing		21.5566	0.0655924	2.70805	0.920808	0.322424	1.60944	0.421874	0.5	440000	0	0	0.336472
002851	2018	1	1	3.57093	Electrical machinery and equipment manufacturing		21.8808	0.0778346	2.77259	0.967027	0.385758	1.60944	0.373083	0.5	440000	0	0	0.336472
002851	2019	1	1	3.61366	Electrical machinery and equipment manufacturing		22.096	0.0884236	2.83321	1.12652	0.409568	1.60944	0.346696	0.5	440000	0	0.0778239	0.336472
002851	2021	1	1	3.90278	Electrical machinery and equipment manufacturing		22.5499	0.0643446	2.94444	1.29422	0.396282	1.60944	0.359641	0.5	440000	0	0.0105397	0.336472
002851	2022	2	1.5	3.92308	Electrical machinery and equipment manufacturing		22.8579	0.055159	2.99573	1.06007	0.43615	1.60944	0.357437	0.5	440000	0	0.0292618	0.336472
002851	2023	4	1.75	4.02121	Electrical machinery and equipment manufacturing		23.0371	0.0599752	3.04452	0.969293	0.438926	1.60944	0.350478	0.5	440000	0	0.0579839	0.336472
002882	2022	1	1	3.62194	Electrical machinery and equipment manufacturing		21.7527	0.0762691	3.29584	0.940622	0.248101	2.19722	0.566275	0.25	440000	0	0.197457	0.287657
002922	2018	2	1.5	3.39009	Electrical machinery and equipment manufacturing		21.0175	0.0292547	2.99573	0.815037	0.286462	1.60944	0.548836	0.5	440000	0	0	0.336472
002922	2019	4	1.234	3.35749	Electrical machinery and equipment manufacturing		21.0726	0.0390939	3.04452	0.844759	0.296541	1.79176	0.474935	0.333333	440000	0	0	0.287657
002922	2020	4	1.234	3.60236	Electrical machinery and equipment manufacturing		21.5618	0.020417	3.09104	0.82245	0.314078	1.79176	0.397014	0.333333	440000	0	0	0.287657
002922	2021	4	1.234	3.70704	Electrical machinery and equipment manufacturing		21.7277	0.0668138	3.13549	1.25431	0.339604	1.79176	0.345087	0.333333	440000	0	0.132909	0.287657
002922	2022	7	1.53	3.7496	Electrical machinery and equipment manufacturing		21.9838	0.0529295	3.17805	1.00915	0.405866	1.60944	0.327318	0	440000	0	0.258529	0.336472
002922	2023	5	1.393	3.8029	Electrical machinery and equipment manufacturing		22.3903	0.0402403	3.21888	0.862059	0.346185	1.60944	0.289343	0	440000	0	0.123068	0.336472
002927	2018	2	0.875	3.34508	Electrical machinery and equipment manufacturing		20.5311	0.0849331	2.3979	1.21766	0.103715	2.07944	0.565871	0.5	520000	0	0	0.318454
002959	2019	4	1.75	3.39289	Electrical machinery and equipment manufacturing		21.6524	0.100667	2.63906	0.977518	0.294601	1.60944	0.546849	0.5	440000	0	0.0811475	0.451967
002959	2020	6	1.833	3.60607	Electrical machinery and equipment manufacturing		22.0294	0.109724	2.70805	1.40594	0.382275	1.60944	0.535254	0.5	440000	0	0.0221199	0.451967
002959	2021	6	1.833	3.60411	Electrical machinery and equipment manufacturing		22.0089	0.0754229	2.77259	1.12077	0.356279	1.60944	0.530232	0.5	440000	0	0.0115328	0.451967
002959	2022	5	1.8	3.61419	Electrical machinery and equipment manufacturing		22.3069	0.0762256	2.83321	1.23668	0.41497	1.60944	0.539237	0.5	440000	0	0.0493745	0.451967
002959	2023	5	1.8	3.64751	Electrical machinery and equipment manufacturing		22.4071	0.0794338	2.89037	1.0945	0.400092	1.60944	0.507587	0.5	440000	0	0.0240859	0.451967
003021	2020	1	1	3.79187	Electrical machinery and equipment manufacturing		21.8593	0.0756505	2.99573	0.869811	0.104152	1.94591	0.559603	0.4	440000	0	0.0557869	0.356695
003021	2021	1	1	3.74741	Electrical machinery and equipment manufacturing		21.9059	0.0442266	3.04452	1.15385	0.125392	1.94591	0.563209	0.4	440000	0	0.0563847	0.356695
003021	2023	2	1.5	3.86534	Electrical machinery and equipment manufacturing		22.0593	0.0462134	3.13549	1.1692	0.172537	1.94591	0.535697	0.4	440000	0	0.034069	0.356695
003023	2022	2	1.5	3.42169	Electrical machinery and equipment manufacturing		21.4069	0.0470217	3.3673	0.81035	0.24076	2.19722	0.426054	0.166667	510000	0	0	0.287657
003023	2023	3	1.667	3.39839	Electrical machinery and equipment manufacturing		21.463	0.0494153	3.4012	0.764669	0.246797	2.19722	0.424163	0.166667	510000	0	0	0.287657
300001	2012	1	1	3.85711	Electrical machinery and equipment manufacturing		21.1108	0.0531163	2.19722	0.780905	0.178875	2.19722	0.542609	0.5	370000	0	0.049923	0.287657
300001	2015	1	1	3.91411	Electrical machinery and equipment manufacturing		22.5799	0.0210887	2.48491	1.68461	0.458762	2.19722	0.465964	0.416667	370000	0	0.185564	0.287657
300001	2016	2	1.5	3.90805	Electrical machinery and equipment manufacturing		23.1859	0.014149	2.56495	1.11216	0.559951	2.19722	0.45595	0.384615	370000	0	0.227528	0.287657
300001	2017	5	1.7	3.99023	Electrical machinery and equipment manufacturing		23.2439	0.0109978	2.63906	1.00566	0.556262	2.19722	0.45595	0.4	370000	0	0.212415	0.287657
300001	2018	3	1.074	4.06273	Electrical machinery and equipment manufacturing		23.3194	0.0116012	2.70805	1.09008	0.558137	2.19722	0.4385	0.461538	370000	0	0.156678	0.287657
300001	2019	3	1.667	4.07263	Electrical machinery and equipment manufacturing		23.4201	0.0133716	2.77259	1.05343	0.568277	2.19722	0.403567	0.461538	370000	0	0.131422	0.287657
300001	2020	1	1	4.08608	Electrical machinery and equipment manufacturing		23.5526	0.0108435	2.83321	1.20774	0.525675	2.19722	0.408629	0.545455	370000	0	0.137883	0.287657
300001	2021	1	1	4.12132	Electrical machinery and equipment manufacturing		23.729	0.0087529	2.89037	1.06198	0.503866	2.07944	0.393281	0.545455	370000	0	0.0526715	0.251303
300001	2022	2	1.5	4.03196	Electrical machinery and equipment manufacturing		23.8145	0.0112416	2.94444	0.86943	0.513383	2.19722	0.35414	0.5	370000	0	0.0489634	0.287657
300001	2023	2	0.875	3.95833	Electrical machinery and equipment manufacturing		23.8962	0.0218216	2.99573	0.93671	0.517422	2.19722	0.342142	0.5	370000	0	0.0427735	0.287657
300014	2018	2	1.5	4.0091	Electrical machinery and equipment manufacturing		23.029	0.0564827	2.89037	1.07512	0.489179	1.94591	0.375998	0.333333	440000	0	0	0.356695
300014	2019	1	1	4.04727	Electrical machinery and equipment manufacturing		23.5141	0.0908015	2.94444	1.41623	0.423127	1.94591	0.368813	0.142857	440000	0	0	0.356695
300014	2020	3	1.389	4.19739	Electrical machinery and equipment manufacturing		23.9698	0.0633694	2.99573	1.94947	0.301087	1.94591	0.352031	0.142857	440000	0	0.0220955	0.356695
300014	2022	2	1.5	3.98384	Electrical machinery and equipment manufacturing		25.1498	0.0429659	3.09104	1.27356	0.472205	1.94591	0.382733	0.2	440000	0	0.0372205	0.356695
300014	2023	4	1.465	3.93799	Electrical machinery and equipment manufacturing		25.2703	0.0467947	3.13549	0.902518	0.468259	1.94591	0.369933	0.2	440000	0	0.0883967	0.356695
300018	2011	3	1.389	3.94294	Electrical machinery and equipment manufacturing		20.464	0.0508389	2.3979	0.873933	0.0928764	1.60944	0.297823	0.5	420000	0	0.332599	0.336472
300018	2012	1	1	3.87093	Electrical machinery and equipment manufacturing		20.5147	0.055127	2.48491	0.888178	0.104871	1.60944	0.292153	0.5	420000	0	0.245652	0.336472
300018	2013	13	1.778	3.87063	Electrical machinery and equipment manufacturing		20.5158	0.0483398	2.56495	0.978007	0.0836084	1.60944	0.27901	0.5	420000	0	0.292555	0.336472
300018	2014	9	1.718	3.82643	Electrical machinery and equipment manufacturing		20.5656	0.0568814	2.63906	1.29625	0.0843658	1.60944	0.27901	0.5	420000	0	0.223519	0.336472
300018	2015	6	1.556	3.97454	Electrical machinery and equipment manufacturing		21.1438	0.0474094	2.70805	1.59199	0.0900726	1.60944	0.268886	0.4	420000	0	0.253961	0.336472
300018	2016	9	1.685	3.96179	Electrical machinery and equipment manufacturing		21.1921	0.066796	2.77259	1.33712	0.0756435	1.60944	0.261708	0.5	420000	0	0.198621	0.336472
300018	2017	7	1.646	4.19835	Electrical machinery and equipment manufacturing		21.2777	0.0590446	2.83321	0.967859	0.0971421	1.60944	0.25934	0.428571	420000	0	0.200267	0.336472
300018	2018	9	1.68	4.16259	Electrical machinery and equipment manufacturing		20.915	-0.449741	2.89037	0.988407	0.117469	1.60944	0.243634	0.428571	420000	0	0.0216084	0.336472
300018	2019	8	1.677	4.13326	Electrical machinery and equipment manufacturing		20.9414	0.0343418	2.94444	1.05775	0.108074	1.60944	0.20332	0.428571	420000	0	0	0.336472
300018	2020	6	1.615	4.07777	Electrical machinery and equipment manufacturing		21.0029	0.0368319	2.99573	1.16715	0.122269	2.19722	0.1997	0.333333	420000	0	0	0.287657
300018	2021	5	1.487	3.96194	Electrical machinery and equipment manufacturing		21.0746	0.0588497	3.04452	1.28911	0.118262	2.19722	0.189894	0.4	420000	0	0.0251396	0.287657
300018	2022	1	1	4.02029	Electrical machinery and equipment manufacturing		21.0511	0.00435759	3.09104	1.09518	0.11358	2.19722	0.161766	0.333333	420000	0	0.0915925	0.287657
300018	2023	3	1.074	4.03584	Electrical machinery and equipment manufacturing		21.087	0.0431438	3.13549	1.06574	0.118801	1.94591	0.161766	0.25	420000	0	0.134845	0.356695
300032	2020	1	1	3.82817	Electrical machinery and equipment manufacturing		21.5434	-0.11694	3.3322	1.18668	0.386885	1.60944	0.284767	0.5	330000	0	0	0.451967
300032	2021	2	1.5	3.85033	Electrical machinery and equipment manufacturing		21.7805	-0.0383732	3.3673	1.21704	0.478532	2.19722	0.297892	0.5	330000	0	0	0.287657
300032	2022	1	1	3.82014	Electrical machinery and equipment manufacturing		21.8939	0.016019	3.4012	1.06291	0.492667	2.19722	0.279765	1	330000	0	0.260599	0.287657
300032	2023	2	1.5	3.85113	Electrical machinery and equipment manufacturing		21.451	-0.19301	3.43399	1.4016	0.478604	2.07944	0.263504	0	330000	0	0.0557791	0.318454
300035	2011	1	1	3.91368	Special equipment manufacturing		20.673	0.0421898	2.07944	0.782918	0.179588	2.19722	0.336472	0.428571	430000	0	0	0.287657
300035	2017	1	1	3.77563	Special equipment manufacturing		21.1272	0.0312116	2.63906	1.20171	0.222265	2.19722	0.244622	0.166667	430000	0	0.0882212	0.287657
300035	2020	1	1	3.83234	Electrical machinery and equipment manufacturing		21.7479	0.0571304	2.83321	1.3036	0.222249	2.19722	0.216305	0.4	430000	0	0.0133034	0.287657
300035	2022	1	1	3.7781	Electrical machinery and equipment manufacturing		23.1626	0.0307592	2.94444	1.00605	0.430594	2.19722	0.199592	0.4	430000	0	0.0102407	0.287657
300035	2023	1	1	3.78396	Computer, communication, and other electronic equipment manufacturing		23.0624	0.00100528	2.99573	0.786627	0.401402	2.19722	0.206972	0	430000	0	0.10285	0.287657
300062	2016	1	1	3.86635	Electrical machinery and equipment manufacturing		21.2999	0.0482386	2.70805	1.17646	0.389116	2.19722	0.507907	0	350000	0	0.263136	0.287657
300062	2017	1	1	3.81977	Electrical machinery and equipment manufacturing		21.4525	-0.0324563	2.77259	0.864378	0.456321	2.19722	0.450018	0.25	350000	0	0.205428	0.287657
300062	2021	1	1	3.9129	Electrical machinery and equipment manufacturing		21.4418	0.0109756	2.99573	1.03506	0.472525	1.94591	0.401718	0.25	350000	0	0.0343322	0.356695
300062	2022	1	1	3.82988	Electrical machinery and equipment manufacturing		21.667	0.0158635	3.04452	0.917864	0.415939	1.94591	0.358411	0.2	350000	0	0.0395413	0.356695
300062	2023	1	1	3.81693	Electrical machinery and equipment manufacturing		21.8345	0.0170248	3.09104	0.907971	0.446001	1.94591	0.357912	0.2	350000	0	0.0629006	0.356695
300068	2011	2	0.875	3.83097	Electrical machinery and equipment manufacturing		21.8993	0.02636	2.70805	0.787754	0.163756	2.19722	0.427148	0	330000	0	0.0955076	0.287657
300068	2012	3	1.389	3.81291	Electrical machinery and equipment manufacturing		22.0858	0.0397445	2.77259	0.746468	0.23061	2.19722	0.427148	0.2	330000	0	0.0157906	0.287657
300068	2013	6	1.616	3.90967	Electrical machinery and equipment manufacturing		22.1659	0.035126	2.83321	0.806724	0.250686	2.19722	0.368565	0.2	330000	0	0	0.287657
300068	2014	1	1	3.91126	Electrical machinery and equipment manufacturing		22.3059	0.0209081	2.89037	0.883622	0.329983	2.19722	0.325666	0.2	330000	0	0	0.287657
300068	2015	5	1.587	3.84177	Electrical machinery and equipment manufacturing		22.6594	0.0394997	2.94444	1.06476	0.415644	2.19722	0.323563	0.2	330000	0	0	0.287657
300068	2016	3	1.667	3.80501	Electrical machinery and equipment manufacturing		22.9413	0.0506313	2.99573	0.997218	0.269292	2.19722	0.323243	0.166667	330000	0	0.0527178	0.287657
300068	2017	2	1.5	3.88511	Electrical machinery and equipment manufacturing		23.1115	0.0376985	3.04452	0.912838	0.36056	2.19722	0.336277	0.333333	330000	0	0	0.287657
300068	2018	2	1.5	3.99777	Electrical machinery and equipment manufacturing		23.2634	0.00956119	3.09104	0.855677	0.415213	2.19722	0.318103	0.285714	330000	0	0	0.287657
300068	2019	4	1.75	3.85801	Electrical machinery and equipment manufacturing		23.3027	0.019383	3.13549	0.797078	0.418053	2.19722	0.314559	0.2	330000	0	0.0766806	0.287657
300068	2020	6	1.637	3.91422	Electrical machinery and equipment manufacturing		23.3823	-0.0286047	3.17805	0.913383	0.467884	2.19722	0.255313	0.4	330000	0	0.105453	0.287657
300068	2021	4	1.594	4.0495	Electrical machinery and equipment manufacturing		23.3503	-0.126259	3.21888	0.942156	0.531173	2.19722	0.219584	0.285714	330000	0	0.011472	0.287657
300068	2022	6	1.694	3.98031	Electrical machinery and equipment manufacturing		23.4966	0.0170149	3.2581	1.03216	0.521916	1.94591	0.224302	0.285714	330000	0	0.173942	0.356695
300068	2023	6	1.694	3.94697	Electrical machinery and equipment manufacturing		23.6249	-0.00131657	3.29584	0.838529	0.535862	1.94591	0.218711	0.333333	330000	0	0.212468	0.356695
300073	2019	1	1	3.89953	Electrical machinery and equipment manufacturing		22.2468	-0.0466305	2.94444	1.34143	0.226354	2.19722	0.290362	0.571429	110000	1	0.0128851	0.287657
300073	2020	1	1	3.93944	Electrical machinery and equipment manufacturing		22.5052	0.0633641	2.99573	1.81458	0.306447	2.07944	0.286037	0.666667	110000	1	0.0257912	0.318454
300073	2021	1	1	3.86387	Electrical machinery and equipment manufacturing		23.3965	0.0726087	3.04452	1.399	0.29848	2.19722	0.356703	0.714286	110000	1	0.0251998	0.287657
300073	2023	2	0.875	3.8204	Computer, communication, and other electronic equipment manufacturing		23.5803	0.104555	3.13549	0.84863	0.213109	2.19722	0.302368	0.666667	110000	1	0.0856111	0.287657
300080	2023	2	0.875	3.55735	Electrical machinery and equipment manufacturing		23.5471	0.00163748	2.77259	0.73976	0.434431	2.19722	0.551707	0.363636	410000	1	0.0970155	0.287657
300118	2019	1	1	3.68097	Electrical machinery and equipment manufacturing		23.9662	0.037479	2.3979	0.739085	0.491151	2.19722	0.36816	0	330000	0	0.0872175	0.287657
300118	2020	2	1.5	3.75142	Electrical machinery and equipment manufacturing		24.0879	0.00813603	2.48491	0.937514	0.504607	1.94591	0.331854	0	330000	0	0.132343	0.356695
300118	2022	1	1	3.7586	Electrical machinery and equipment manufacturing		24.3677	0.0246734	2.63906	0.805674	0.547074	1.94591	0.328282	0	330000	0	0.259223	0.356695
300118	2023	1	1	3.833	Electrical machinery and equipment manufacturing		24.7168	0.0252289	2.70805	0.728979	0.541919	1.94591	0.302304	0.166667	330000	0	0.170341	0.356695
300124	2011	4	1.296	3.79089	Electrical machinery and equipment manufacturing		21.7065	0.121868	2.19722	1.10797	0.0578457	2.19722	0.321993	0.25	440000	0	0.0461976	0.287657
300124	2012	4	1.316	3.93099	Electrical machinery and equipment manufacturing		21.813	0.102268	2.30259	0.985523	0.0860986	2.19722	0.321993	0.25	440000	0	0.0184269	0.287657
300124	2013	5	1.41	3.91267	Electrical machinery and equipment manufacturing		22.057	0.139724	2.3979	1.77945	0.138018	2.19722	0.318967	0.25	440000	0	0.0313309	0.287657
300124	2014	1	1	3.99651	Electrical machinery and equipment manufacturing		22.2647	0.137781	2.48491	1.63992	0.198443	2.19722	0.312646	0.166667	440000	0	0.0585647	0.287657
300124	2016	2	0.875	4.14599	Electrical machinery and equipment manufacturing		22.7994	0.115935	2.63906	1.55605	0.318579	2.19722	0.298833	0.142857	440000	0	0.131324	0.287657
300124	2017	1	1	4.18228	Electrical machinery and equipment manufacturing		22.9257	0.113892	2.70805	1.69547	0.312728	2.19722	0.30035	0.4	440000	0	0.156733	0.287657
300124	2019	1	1	4.17882	Electrical machinery and equipment manufacturing		23.4237	0.0656551	2.83321	1.46314	0.336243	2.19722	0.338075	0.333333	440000	0	0	0.287657
300124	2020	1	1	4.23851	Electrical machinery and equipment manufacturing		23.649	0.110643	2.89037	2.14636	0.343073	2.19722	0.328609	0.333333	440000	0	0.0293966	0.287657
300124	2021	3	1.389	4.12611	Electrical machinery and equipment manufacturing		24.0303	0.126473	2.94444	1.96105	0.337831	2.19722	0.357796	0.333333	440000	0	0	0.287657
300124	2022	5	1.7	4.08829	Electrical machinery and equipment manufacturing		24.3922	0.104618	2.99573	1.73089	0.396829	2.19722	0.383825	0.333333	440000	0	0.0108473	0.287657
300124	2023	1	1	4.03923	Electrical machinery and equipment manufacturing		24.6142	0.093076	3.04452	1.51753	0.398329	2.19722	0.39128	0.125	440000	0	0.0920698	0.287657
300153	2011	1	1	3.92212	Electrical machinery and equipment manufacturing		20.867	0.0341509	2.30259	0.871285	0.178172	2.19722	0.566539	0.333333	310000	0	0.0360529	0.287657
300153	2012	1	1	3.90218	Electrical machinery and equipment manufacturing		20.7441	0.0129675	2.3979	0.748826	0.0950306	2.19722	0.565492	0.333333	310000	0	0.0534125	0.287657
300153	2013	1	1	3.88946	Electrical machinery and equipment manufacturing		20.7973	0.0185168	2.48491	0.911065	0.133534	2.19722	0.557461	0.333333	310000	0	0.0383189	0.287657
300153	2023	1	1	3.93221	Electrical machinery and equipment manufacturing		21.2431	0.0182877	3.09104	1.10232	0.404845	2.07944	0.321375	0.2	310000	0	0.0430483	0.318454
300193	2016	1	1	3.91795	General equipment manufacturing		21.6329	0.0407301	2.48491	1.01975	0.13411	1.94591	0.327579	0.2	440000	0	0	0.356695
300193	2017	1	1	3.86561	General equipment manufacturing		21.6925	0.0542569	2.56495	0.913347	0.125291	1.94591	0.320621	0.4	440000	0	0.104225	0.356695
300193	2019	1	1	3.9348	General equipment manufacturing		21.7407	0.0746671	2.70805	1.00369	0.136114	1.94591	0.363679	0.25	440000	0	0.0282664	0.356695
300193	2020	1	1	3.89214	General equipment manufacturing		21.7153	0.0594186	2.77259	0.901892	0.150607	1.94591	0.360482	0.25	440000	0	0.18018	0.356695
300193	2022	1	1	4.00216	General equipment manufacturing		21.7346	0.0627878	2.89037	0.903494	0.213114	1.94591	0.323555	0.2	440000	0	0.0772983	0.356695
300207	2011	1	1	3.44545	Electrical machinery and equipment manufacturing		21.1107	0.054797	2.70805	0.840183	0.182177	1.94591	0.49074	0	440000	0	0	0.356695
300207	2012	1	1	3.3831	Electrical machinery and equipment manufacturing		21.4763	0.0333855	2.77259	0.819661	0.350487	1.94591	0.492655	0	440000	0	0	0.356695
300207	2013	1	1	3.59177	Electrical machinery and equipment manufacturing		21.755	0.0291993	2.83321	0.897142	0.431786	1.94591	0.490327	0	440000	0	0	0.356695
300207	2014	1	1	3.76984	Electrical machinery and equipment manufacturing		22.2945	0.0350039	2.89037	0.936282	0.515456	1.60944	0.410671	0	440000	0	0	0.336472
300207	2016	1	1	3.86479	Electrical machinery and equipment manufacturing		22.843	0.0540615	2.99573	1.10594	0.53477	1.60944	0.401221	0	440000	0	0	0.336472
300207	2017	3	1.074	4.04357	Electrical machinery and equipment manufacturing		23.2927	0.0423269	3.04452	0.977056	0.567451	1.60944	0.401391	0	440000	0	0	0.336472
300207	2018	1	1	3.97989	Electrical machinery and equipment manufacturing		23.6505	0.0370967	3.09104	0.836921	0.537203	1.94591	0.388752	0	440000	0	0.0345338	0.356695
300207	2019	4	1.75	4.05299	Electrical machinery and equipment manufacturing		23.8841	0.0313042	3.13549	1.072	0.557278	1.94591	0.371777	0	440000	0	0.0751245	0.356695
300207	2020	1	1	4.06465	Electrical machinery and equipment manufacturing		24.1466	0.0257562	3.17805	1.15649	0.569269	1.94591	0.347659	0	440000	0	0.0506352	0.356695
300207	2021	3	1.667	4.12426	Electrical machinery and equipment manufacturing		24.4758	0.0198584	3.21888	1.15432	0.517298	1.94591	0.320498	0	440000	0	0.0347096	0.356695
300207	2022	1	1	4.02068	Electrical machinery and equipment manufacturing		25.034	0.0101267	3.2581	0.770892	0.498873	1.94591	0.329336	0	440000	0	0.133257	0.356695
300207	2023	2	1.5	3.99536	Electrical machinery and equipment manufacturing		25.096	0.00416418	3.29584	0.663692	0.46415	1.94591	0.28272	0	440000	0	0.0554722	0.356695
300217	2014	2	1.5	3.43261	Electrical machinery and equipment manufacturing		21.2364	0.0613358	2.70805	1.07694	0.243576	1.94591	0.479586	0.285714	320000	0	0	0.356695
300217	2016	1	1	3.56047	Electrical machinery and equipment manufacturing		21.7302	0.0166402	2.83321	1.04657	0.230141	1.79176	0.368259	0.285714	320000	0	0.0627296	0.405465
300222	2011	1	1	3.72787	Electrical machinery and equipment manufacturing		20.3113	0.0786931	2.30259	0.910047	0.0892469	2.19722	0.518027	0	310000	0	0	0.287657
300222	2012	2	0.875	4.02388	Electrical machinery and equipment manufacturing		20.4399	0.0368513	2.3979	0.868112	0.155024	2.19722	0.520325	0	310000	0	0	0.287657
300222	2013	1	1	3.84573	Electrical machinery and equipment manufacturing		20.4884	0.0163624	2.48491	0.923357	0.177335	2.19722	0.508691	0.2	310000	0	0.0544945	0.287657
300222	2014	1	1	4.02561	Electrical machinery and equipment manufacturing		21.2847	0.0456044	2.56495	1.04764	0.218461	2.19722	0.490592	0.2	310000	0	0	0.287657
300222	2015	3	1.667	4.13801	Electrical machinery and equipment manufacturing		21.5064	0.0669308	2.63906	1.60809	0.28101	2.19722	0.470484	0.25	310000	0	0.0910339	0.287657
300222	2016	2	0.875	4.16457	Electrical machinery and equipment manufacturing		22.3078	0.0563733	2.70805	1.04994	0.221083	2.07944	0.409955	0.25	310000	0	0.0544401	0.318454
300222	2017	3	1.389	4.14181	Electrical machinery and equipment manufacturing		22.5122	0.0570684	2.77259	1.01476	0.267663	2.19722	0.393013	0.25	310000	0	0.075837	0.287657
300222	2018	2	1.5	4.15998	Electrical machinery and equipment manufacturing		22.7871	0.0503234	2.83321	0.87577	0.350493	2.19722	0.38308	0	310000	0	0.0427659	0.287657
300222	2019	5	1.618	4.22336	Electrical machinery and equipment manufacturing		22.5732	-0.534226	2.89037	0.908012	0.522665	2.07944	0.366314	0	310000	0	0.0138067	0.318454
300222	2020	2	0.875	4.2452	Electrical machinery and equipment manufacturing		22.4417	-0.0464871	2.94444	1.02227	0.530495	1.94591	0.337297	0.2	310000	0	0.0128503	0.356695
300222	2022	4	1.26	4.14295	Electrical machinery and equipment manufacturing		22.4787	-0.0527523	3.04452	0.886501	0.51118	1.94591	0.293927	0.25	310000	0	0.057962	0.356695
300222	2023	9	1.692	4.1834	General equipment manufacturing		22.4175	-0.0318695	3.09104	0.959452	0.526987	1.94591	0.289765	0.25	310000	0	0.0640588	0.356695
300242	2011	3	1.16	3.76646	Computer, communication, and other electronic equipment manufacturing		19.765	0.0721717	2.30259	0.889282	0.107792	2.19722	0.512265	0.166667	440000	0	0	0.287657
300242	2014	1	1	3.98545	Electrical machinery and equipment manufacturing		19.5677	0.0129325	2.56495	1.71389	0.168691	2.19722	0.486962	0	440000	0	0	0.287657
300242	2015	1	1	3.97787	Electrical machinery and equipment manufacturing		21.6673	0.0213006	2.63906	1.38014	0.214435	2.19722	0.469325	0	440000	0	0.023709	0.287657
300252	2013	1	1	3.86346	Electrical machinery and equipment manufacturing		21.13	0.0105324	2.48491	0.925603	0.422164	1.94591	0.527485	0.666667	440000	0	0.112783	0.356695
300252	2014	1	1	3.74218	Electrical machinery and equipment manufacturing		21.3195	0.0504514	2.56495	1.21881	0.443328	1.94591	0.504287	0	440000	0	0.123096	0.356695
300252	2015	2	1.5	3.88246	Electrical machinery and equipment manufacturing		21.5753	0.0614216	2.63906	1.83883	0.486233	1.94591	0.476725	0	440000	0	0.0779666	0.356695
300252	2016	2	1.5	3.88244	Electrical machinery and equipment manufacturing		22.1253	0.0521862	2.70805	1.28453	0.366499	1.94591	0.460533	0	440000	0	0.0455452	0.356695
300252	2018	1	1	3.95799	Electrical machinery and equipment manufacturing		22.348	0.0300791	2.83321	0.918477	0.409668	1.94591	0.452645	0.333333	440000	0	0	0.356695
300252	2019	1	1	4.03828	Electrical machinery and equipment manufacturing		22.3859	0.0170066	2.89037	0.859711	0.426781	1.94591	0.432219	0.333333	440000	0	0.0140491	0.356695
300252	2020	1	1	4.06187	Electrical machinery and equipment manufacturing		22.4383	-0.011977	2.94444	0.877957	0.449819	1.94591	0.432417	0.4	440000	0	0	0.356695
300252	2021	4	1.75	3.93908	Electrical machinery and equipment manufacturing		22.3844	0.0101118	2.99573	0.864242	0.435618	2.19722	0.384981	0.285714	440000	0	0.0247721	0.287657
300252	2022	3	1.667	3.93775	Electrical machinery and equipment manufacturing		22.4178	-0.0748061	3.04452	0.843663	0.496275	2.19722	0.368439	0.4	440000	0	0.163529	0.287657
300252	2023	1	1	3.79526	Electrical machinery and equipment manufacturing		22.3654	-0.0650799	3.09104	0.963501	0.462404	2.19722	0.310463	0.5	440000	0	0.223749	0.287657
300274	2012	1	1	3.67292	Electrical machinery and equipment manufacturing		21.7364	0.0260905	2.77259	0.764232	0.284849	2.19722	0.531742	0.6	340000	0	0.0729186	0.287657
300274	2015	3	1.667	3.76798	Electrical machinery and equipment manufacturing		22.6377	0.0609251	2.94444	1.27134	0.458649	1.94591	0.39176	0.625	340000	0	0.0385404	0.356695
300274	2019	2	0.875	3.9833	Electrical machinery and equipment manufacturing		23.8509	0.0391685	3.13549	0.79431	0.480164	2.07944	0.375479	0.357143	340000	0	0.0172388	0.318454
300274	2020	2	0.875	3.84556	Electrical machinery and equipment manufacturing		24.0556	0.0681695	3.17805	1.50677	0.477485	2.07944	0.351055	0.461538	340000	0	0.0216881	0.318454
300274	2021	2	1.5	3.83903	Electrical machinery and equipment manufacturing		24.4807	0.039005	3.21888	1.69429	0.476292	2.07944	0.382785	0.428571	340000	0	0.0121317	0.318454
300274	2023	4	1.75	3.97197	Electrical machinery and equipment manufacturing		25.1406	0.109698	3.29584	1.07568	0.497496	2.07944	0.384193	0.272727	340000	0	0.0233129	0.318454
300279	2011	1	1	3.71626	Computer, communication, and other electronic equipment manufacturing		20.0856	0.0651168	2.63906	0.825797	0.301813	1.94591	0.459816	0.333333	320000	0	0.0538924	0.356695
300283	2019	1	1	3.85492	Electrical machinery and equipment manufacturing		21.0956	0.0165273	3.13549	0.912163	0.454259	2.19722	0.47736	0.125	330000	0	0.0199528	0.287657
300356	2015	3	1.667	4.07256	Electrical machinery and equipment manufacturing		21.5017	0.0224291	2.77259	1.49875	0.299261	2.19722	0.434709	0.333333	320000	0	0.0230478	0.287657
300356	2016	2	1.5	3.95963	Electrical machinery and equipment manufacturing		21.5416	0.0349489	2.83321	1.2126	0.28717	2.19722	0.434885	0.166667	320000	0	0.0556937	0.287657
300356	2017	4	1.234	4.00207	Electrical machinery and equipment manufacturing		21.3298	-0.168639	2.89037	1.01304	0.359707	2.19722	0.415021	0.333333	320000	0	0.0525884	0.287657
300356	2018	3	1.074	4.08321	Electrical machinery and equipment manufacturing		21.3242	0.0117147	2.94444	0.974141	0.350992	2.07944	0.392822	0.5	320000	0	0.0167564	0.318454
300356	2019	3	1.074	4.13182	Electrical machinery and equipment manufacturing		21.2863	0.0153106	2.99573	1.14126	0.324599	1.94591	0.317902	0.5	320000	0	0	0.356695
300376	2016	1	1	3.85158	Electrical machinery and equipment manufacturing		22.939	0.0500306	2.77259	0.942707	0.466933	1.94591	0.551454	0.5	440000	0	0.0713875	0.356695
300391	2023	1	1	3.58496	Pharmaceutical manufacturing		21.9604	-0.229762	3.13549	0.912965	0.533425	2.19722	0.233232	0	420000	0	0.0562183	0.287657
300407	2014	1	1	3.45445	Electrical machinery and equipment manufacturing		20.8015	0.066146	2.70805	1.02647	0.276779	2.19722	0.37874	0.714286	120000	0	0.132118	0.287657
300407	2016	1	1	3.38848	Electrical machinery and equipment manufacturing		21.3144	0.0654689	2.83321	1.13098	0.39899	2.19722	0.377391	0.857143	120000	0	0.0302229	0.287657
300407	2017	1	1	3.53701	Electrical machinery and equipment manufacturing		21.4253	0.0317382	2.89037	0.936602	0.412591	2.19722	0.352237	0.875	120000	0	0	0.287657
300407	2018	10	1.768	3.61271	Electrical machinery and equipment manufacturing		21.596	0.00621238	2.94444	0.808086	0.430939	2.19722	0.345273	1	120000	0	0	0.287657
300407	2020	4	1.417	3.91701	Electrical machinery and equipment manufacturing		21.7114	0.0311728	3.04452	0.796458	0.378682	2.19722	0.356665	1	120000	0	0.0397272	0.287657
300407	2021	4	1.594	3.85475	Electrical machinery and equipment manufacturing		21.7636	0.0233177	3.09104	0.839101	0.39575	2.19722	0.353056	1	120000	0	0.0397614	0.287657
300407	2022	2	1.5	3.82775	Electrical machinery and equipment manufacturing		21.7888	0.030288	3.13549	0.76545	0.37851	2.19722	0.336563	1	120000	0	0.0384466	0.287657
300407	2023	8	1.777	3.75768	Railway, ship, aerospace and other transportation equipment manufacturing		21.8546	0.0294059	3.17805	0.821293	0.348007	2.19722	0.324731	0.666667	120000	0	0.0291679	0.287657
300409	2021	2	1.5	3.51593	Electrical machinery and equipment manufacturing		22.8015	0.0686246	2.70805	1.08339	0.352423	2.07944	0.298384	0.4	440000	0	0.0110291	0.318454
300409	2022	1	1	3.53339	Electrical machinery and equipment manufacturing		23.1831	0.00629029	2.77259	0.766421	0.375239	2.07944	0.288742	0.333333	440000	0	0.00981458	0.318454
300409	2023	1	1	3.49494	Computer, communication, and other electronic equipment manufacturing		23.4225	-0.00187394	2.83321	0.675532	0.42035	2.07944	0.287911	0.125	440000	0	0.0470707	0.318454
300427	2015	8	1.836	3.69175	Electrical machinery and equipment manufacturing		20.4485	0.0947981	2.3979	1.38894	0.157063	1.94591	0.52651	0.4	350000	0	0.120337	0.356695
300427	2016	5	1.7	3.67693	Electrical machinery and equipment manufacturing		20.6113	0.0905255	2.48491	1.27618	0.205607	1.94591	0.52651	0.25	350000	0	0.0969752	0.356695
300427	2017	3	1.389	3.76723	Electrical machinery and equipment manufacturing		21.8747	0.0277893	2.56495	0.824961	0.319588	1.94591	0.508138	0.25	350000	0	0.133424	0.356695
300438	2019	2	0.875	3.92934	Electrical machinery and equipment manufacturing		22.4093	0.0330044	2.94444	0.994493	0.429127	2.19722	0.389073	0.5	440000	0	0.222148	0.287657
300438	2020	3	1.389	4.00408	Electrical machinery and equipment manufacturing		22.6633	0.00921957	2.99573	1.06792	0.482634	2.19722	0.394515	0.6	440000	0	0.0353894	0.287657
300438	2021	5	1.486	3.81342	Electrical machinery and equipment manufacturing		22.8641	0.0212492	3.04452	1.2716	0.502483	2.19722	0.378632	0.5	440000	0	0.0117043	0.287657
300438	2022	6	1.537	3.81777	Electrical machinery and equipment manufacturing		23.2177	0.0521904	3.09104	1.3965	0.504394	2.19722	0.35152	0.333333	440000	0	0.440295	0.287657
300438	2023	4	1.417	3.8648	Electrical machinery and equipment manufacturing		23.4749	0.00423089	3.13549	0.8724	0.495616	2.19722	0.330211	0.333333	440000	0	0.473319	0.287657
300444	2017	1	1	3.74502	Electrical machinery and equipment manufacturing		21.6722	0.0417814	2.77259	1.06227	0.401966	2.19722	0.404073	0.6	110000	0	0	0.287657
300444	2018	2	0.875	3.82954	Electrical machinery and equipment manufacturing		22.099	0.0406869	2.83321	0.819805	0.448304	2.19722	0.399902	0.545455	110000	0	0.0127261	0.287657
300444	2019	1	1	3.85954	Electrical machinery and equipment manufacturing		21.7771	-0.414591	2.89037	0.880137	0.551932	2.19722	0.36027	0.571429	110000	0	0	0.287657
300444	2020	3	1.667	3.89599	Electrical machinery and equipment manufacturing		21.6973	0.00771494	2.94444	0.933593	0.542012	2.19722	0.328283	0.444444	110000	0	0.03711	0.287657
300444	2021	1	1	3.99666	Electrical machinery and equipment manufacturing		21.9455	-0.0396181	2.99573	1.0154	0.497136	2.19722	0.275183	0.428571	110000	0	0.0221028	0.287657
300444	2022	1	1	3.81111	Electrical machinery and equipment manufacturing		22.0891	-0.0477326	3.04452	0.876859	0.527352	2.19722	0.268734	0.333333	110000	0	0.010094	0.287657
300475	2015	1	1	3.66329	Electrical machinery and equipment manufacturing		20.9493	0.0806888	2.89037	1.11389	0.142385	1.94591	0.460966	0.25	340000	0	0	0.356695
300475	2016	1	1	3.67657	Electrical machinery and equipment manufacturing		21.0958	0.0643809	2.94444	1.04125	0.192451	1.94591	0.438611	0.333333	340000	0	0	0.356695
300475	2017	1	1	3.76222	Electrical machinery and equipment manufacturing		21.1427	0.0546168	2.99573	0.873918	0.184437	1.94591	0.438611	0.25	340000	0	0	0.356695
300475	2018	1	1	3.74242	Electrical machinery and equipment manufacturing		21.1188	0.0156422	3.04452	0.772958	0.143765	1.94591	0.440834	0.25	340000	0	0.0935918	0.356695
300475	2019	1	1	3.78344	Electrical machinery and equipment manufacturing		21.1153	0.0355154	3.09104	1.05495	0.10741	1.94591	0.505858	0	340000	0	0.0193504	0.356695
300475	2020	2	0.875	3.85228	Electrical machinery and equipment manufacturing		21.127	0.0379135	3.13549	1.19665	0.0897865	1.94591	0.492779	0	340000	0	0	0.356695
300477	2016	1	1	3.37138	Electrical machinery and equipment manufacturing		21.4208	0.043119	2.99573	1.23139	0.445556	2.19722	0.422567	0.625	110000	0	0.0542138	0.287657
300477	2022	1	1	3.72965	Electrical machinery and equipment manufacturing		22.7072	0.00453191	3.2581	0.828418	0.463001	2.19722	0.195929	0.333333	110000	0	0.0101824	0.287657
300477	2023	3	1.074	3.87028	Electrical machinery and equipment manufacturing		22.9942	-0.0904802	3.29584	0.767339	0.566205	2.19722	0.191733	0.2	110000	0	0.0623125	0.287657
300484	2020	1	1	3.83651	Electrical machinery and equipment manufacturing		20.7702	0.0492682	2.70805	1.34474	0.346434	2.07944	0.320941	0.8	440000	0	0.228941	0.318454
300490	2018	1	1	3.87582	Electrical machinery and equipment manufacturing		21.7418	0.0350311	2.30259	0.802113	0.324418	2.19722	0.451986	0.125	430000	0	0.0938146	0.287657
300490	2019	2	1.5	4.01504	Electrical machinery and equipment manufacturing		21.8687	0.0276906	2.3979	0.838413	0.35528	2.19722	0.443428	0.222222	430000	0	0	0.287657
300490	2020	1	1	3.93584	Electrical machinery and equipment manufacturing		21.974	0.00915638	2.48491	0.836342	0.396998	2.19722	0.408849	0.25	430000	0	0.091892	0.287657
300490	2023	1	1	3.93058	Electrical machinery and equipment manufacturing		22.672	-0.0285358	2.70805	0.809622	0.467765	2.19722	0.237233	0.166667	430000	0	0.242095	0.287657
300530	2022	4	1.234	3.39682	Chemical raw materials and chemical products manufacturing		21.1792	-0.166041	3.04452	1.31564	0.641662	2.19722	0.547916	0.5	430000	1	0.0506608	0.287657
300593	2017	1	1	3.50931	Electrical machinery and equipment manufacturing		20.4447	0.0459676	3.04452	0.96789	0.235228	2.19722	0.346213	0.857143	110000	0	0	0.287657
300593	2023	1	1	3.69528	Electrical machinery and equipment manufacturing		22.2528	0.0223195	3.29584	1.04532	0.26217	2.19722	0.26899	0.714286	110000	0	0	0.367694
300625	2020	1	1	3.40866	Electrical machinery and equipment manufacturing		21.8985	0.069957	2.3979	0.836058	0.231125	2.19722	0.523366	0	440000	0	0.120531	0.287657
300650	2019	1	1	3.30437	Electrical machinery and equipment manufacturing		20.5421	0.0610419	2.56495	0.974108	0.29596	1.79176	0.503663	0.4	350000	0	0.0501358	0.287657
300660	2017	1	1	3.36021	Electrical machinery and equipment manufacturing		21.7751	0.0733618	2.48491	0.889236	0.265996	2.19722	0.570731	0	320000	0	0.165392	0.287657
300660	2019	1	1	3.52365	Electrical machinery and equipment manufacturing		21.896	0.0692335	2.63906	0.761592	0.243092	2.19722	0.555587	0	320000	0	0.0212277	0.287657
300660	2020	2	1.5	3.67324	Electrical machinery and equipment manufacturing		22.0495	0.0717351	2.70805	0.821305	0.277215	2.19722	0.557878	0	320000	0	0.0209915	0.287657
300660	2021	1	1	3.75999	Electrical machinery and equipment manufacturing		22.2248	0.0569289	2.77259	0.923041	0.318457	2.19722	0.568343	0	320000	0	0	0.287657
300660	2022	3	1.389	3.73564	Electrical machinery and equipment manufacturing		22.3213	0.0604155	2.83321	0.953963	0.304507	2.19722	0.535169	0	320000	0	0.185453	0.287657
300681	2020	1	1	3.31296	Electrical machinery and equipment manufacturing		20.8105	0.0119862	2.77259	1.11071	0.385072	2.19722	0.494624	0.428571	440000	0	0.113941	0.287657
300681	2021	1	1	3.45559	Electrical machinery and equipment manufacturing		21.4139	0.0232068	2.83321	1.40741	0.506849	2.19722	0.455631	0.625	440000	0	0	0.287657
300681	2023	3	1.667	3.40377	Automobile manufacturing		22.1413	0.0197498	2.94444	0.91824	0.444018	2.19722	0.375883	0.666667	440000	0	0.100422	0.287657
300724	2020	1	1	3.50091	Electrical machinery and equipment manufacturing		22.9515	0.0536622	2.63906	1.50258	0.514664	2.19722	0.312325	0.571429	440000	0	0.116716	0.287657
300724	2023	1	1	3.62971	Special equipment manufacturing		24.3902	0.0410355	2.83321	0.850789	0.574571	1.94591	0.276818	0.2	440000	0	0.037511	0.356695
300750	2018	2	1.5	3.43312	Electrical machinery and equipment manufacturing		25.0258	0.0493277	2.19722	0.774656	0.421058	2.19722	0.431007	0.333333	350000	0	0.168749	0.287657
300750	2019	3	1.667	3.40265	Electrical machinery and equipment manufacturing		25.3419	0.0482739	2.19722	1.11048	0.459795	2.19722	0.428883	0.333333	350000	0	0.151002	0.287657
300750	2020	4	1.75	3.51147	Electrical machinery and equipment manufacturing		25.7771	0.0382329	2.30259	1.51153	0.443528	2.19722	0.424622	0.333333	350000	0	0.105388	0.287657
300750	2021	6	1.764	3.71142	Electrical machinery and equipment manufacturing		26.4523	0.0564296	2.3979	1.72862	0.530012	2.19722	0.443193	0.333333	350000	0	0.0239762	0.287657
300750	2022	12	1.88	3.65032	Electrical machinery and equipment manufacturing		26.4438	0.054179	2.48491	1.1181	0.533928	2.19722	0.41861	0.2	350000	0	0.26424	0.287657
300750	2023	24	1.95	3.7967	Electrical machinery and equipment manufacturing		26.4403	0.0631648	2.56495	0.961336	0.526739	2.19722	0.435358	0	350000	0	0.155013	0.287657
300769	2019	1	1	3.47903	Chemical raw materials and chemical products manufacturing		21.2593	0.057554	2.56495	0.943022	0.351955	2.19722	0.425457	0.5	440000	0	0.159829	0.287657
300769	2020	2	1.5	3.4795	Chemical raw materials and chemical products manufacturing		22.0535	-0.0092615	2.63906	1.28496	0.351142	1.94591	0.36586	0.5	440000	0	0.0743976	0.356695
300769	2021	3	1.389	3.4182	Electrical machinery and equipment manufacturing		22.9148	0.0860673	2.70805	1.55144	0.440422	1.94591	0.351768	0.428571	440000	0	0.0670792	0.356695
300769	2022	3	1.389	3.50145	Electrical machinery and equipment manufacturing		24.0938	0.0794995	2.77259	1.06211	0.490803	1.94591	0.305909	0.333333	440000	0	0.0106271	0.356695
300769	2023	4	1.465	3.44253	Computer, communication, and other electronic equipment manufacturing		23.7551	-0.100455	2.83321	0.858988	0.457182	1.94591	0.311174	0.285714	440000	0	0.143597	0.356695
300820	2021	2	1.5	3.41874	Electrical machinery and equipment manufacturing		21.4514	0.0732334	3.2581	1.134	0.354775	1.94591	0.541174	0.2	510000	0	0.0830747	0.356695
300820	2022	1	1	3.57517	Electrical machinery and equipment manufacturing		21.7767	0.111709	3.29584	1.09719	0.387553	1.94591	0.541832	0.2	510000	0	0.180547	0.356695
300827	2020	1	1	3.40947	Electrical machinery and equipment manufacturing		21.5329	0.0338866	2.19722	0.940994	0.484913	2.19722	0.432224	0.5	320000	0	0.0799147	0.287657
300827	2021	1	1	3.66727	Electrical machinery and equipment manufacturing		21.7154	0.0216066	2.30259	1.30369	0.513176	2.19722	0.415467	0.5	320000	0	0.122498	0.287657
300827	2023	1	1	3.66568	Electrical machinery and equipment manufacturing		22.6606	0.040291	2.48491	1.08225	0.557326	2.19722	0.365017	0.5	320000	0	0.109865	0.287657
300894	2020	2	1.5	3.81021	Electrical machinery and equipment manufacturing		21.496	0.119618	2.3979	1.03035	0.321299	2.19722	0.586551	0.3	330000	0	0.0241558	0.287657
300894	2022	1	1	3.71728	Electrical machinery and equipment manufacturing		21.8865	0.0931668	2.56495	1.04469	0.396015	2.19722	0.559453	0.166667	330000	0	0.0268328	0.287657
300913	2023	3	1.667	3.70885	Electrical machinery and equipment manufacturing		20.9515	0.0752224	3.3673	1.84737	0.136905	2.19722	0.542252	0	330000	0	0.0586747	0.287657
301031	2022	1	1	3.46762	Electrical machinery and equipment manufacturing		21.0346	0.106746	2.77259	1.79153	0.326903	2.19722	0.310973	0.5	610000	0	0.0548458	0.287657
301031	2023	1	1	3.493	Electrical machinery and equipment manufacturing		21.244	0.0671911	2.83321	1.50695	0.346779	2.19722	0.310772	0.4	610000	0	0.0358076	0.287657
301226	2023	1	1	3.56529	Electrical machinery and equipment manufacturing		20.7683	0.0384788	3.3673	0.986261	0.127163	1.60944	0.502723	0.2	320000	0	0.108503	0.451967
301291	2023	2	1.5	3.59914	Electrical machinery and equipment manufacturing		22.7819	0.0616027	2.19722	0.755578	0.380184	1.94591	0.481195	0.285714	440000	0	0.0602447	0.356695
301327	2022	1	1	3.50984	Electrical machinery and equipment manufacturing		22.7442	0.0372909	2.48491	0.865005	0.141225	1.94591	0.534908	0	440000	0	0.307697	0.356695
301359	2023	1	1	3.40704	Electrical machinery and equipment manufacturing		20.6272	0.0421031	3.61092	0.909783	0.0584235	2.19722	0.43715	0.333333	330000	0	0.012117	0.287657
301361	2022	2	1.5	3.64905	Electrical machinery and equipment manufacturing		20.8029	0.0538857	2.99573	0.854048	0.0619864	2.19722	0.559616	0.333333	410000	0	0.0437962	0.287657
301361	2023	4	1.594	3.65367	Electrical machinery and equipment manufacturing		20.8447	0.0627862	3.04452	0.864703	0.0475616	2.19722	0.559616	0.333333	410000	0	0.0368321	0.287657
301388	2023	1	1	3.70863	Electrical machinery and equipment manufacturing		20.9634	0.0347699	3.49651	0.829543	0.185461	1.94591	0.476663	0	330000	0	0.0506181	0.356695
301439	2023	1	1	3.41682	Electrical machinery and equipment manufacturing		22.0738	0.0537461	3.29584	0.78139	0.23437	2.19722	0.535951	0	370000	0	0.0772585	0.287657
600089	2011	1	1	3.86146	Electrical machinery and equipment manufacturing		24.2382	0.0360797	2.94444	0.781201	0.458629	2.3979	0.201174	0.285714	650000	0	0.131163	0.310128
600089	2012	1	1	3.76075	Electrical machinery and equipment manufacturing		24.462	0.0219578	2.99573	0.718156	0.498169	2.3979	0.203041	0.285714	650000	0	0.256235	0.310128
600089	2013	5	1.352	3.83335	Electrical machinery and equipment manufacturing		24.6484	0.0268449	3.04452	0.807738	0.521841	2.3979	0.209324	0.230769	650000	0	0.157309	0.310128
600089	2014	4	1.594	3.76546	Electrical machinery and equipment manufacturing		24.8057	0.0300936	3.09104	0.839251	0.498029	2.3979	0.192952	0.2	650000	0	0.206492	0.310128
600089	2015	7	1.616	3.86588	Electrical machinery and equipment manufacturing		24.9755	0.028416	3.13549	0.783426	0.500101	2.3979	0.221245	0.307692	650000	0	0.182895	0.310128
600089	2016	7	1.689	3.70939	Electrical machinery and equipment manufacturing		25.0407	0.0328726	3.17805	0.707488	0.491284	2.48491	0.219847	0.166667	650000	0	0.182084	0.34833
600089	2017	5	1.7	3.78984	Electrical machinery and equipment manufacturing		25.1493	0.031115	3.21888	0.709924	0.465653	2.30259	0.238018	0	650000	0	0.211558	0.336472
600089	2018	6	1.685	3.89367	Electrical machinery and equipment manufacturing		25.2515	0.0270007	3.2581	0.615937	0.456789	2.3979	0.223028	0.1	650000	0	0.183691	0.310128
600089	2019	5	1.587	3.93032	Electrical machinery and equipment manufacturing		25.3504	0.0231141	3.29584	0.600025	0.456847	2.3979	0.223721	0.111111	650000	0	0.124803	0.310128
600089	2020	6	1.694	3.97178	Electrical machinery and equipment manufacturing		25.4191	0.0287747	3.3322	0.651674	0.453898	2.3979	0.230861	0.111111	650000	0	0.134694	0.310128
600089	2021	9	1.689	4.01275	Electrical machinery and equipment manufacturing		25.5624	0.0747968	3.3673	0.781119	0.437728	2.3979	0.217748	0.111111	650000	0	0.0406285	0.310128
600089	2022	13	1.774	3.99243	Electrical machinery and equipment manufacturing		25.861	0.125897	3.4012	0.686845	0.424871	2.3979	0.209299	0.111111	650000	0	0.0481789	0.310128
600089	2023	17	1.815	4.06563	Electrical machinery and equipment manufacturing		25.9802	0.0708686	3.43399	0.6451	0.433613	2.3979	0.203274	0.0833333	650000	0	0.230087	0.310128
600105	2017	1	1	3.9811	Electrical machinery and equipment manufacturing		22.2421	0.065881	3.17805	0.953899	0.320356	1.79176	0.404022	0	320000	0	0.0251522	0.287657
600105	2018	8	1.761	3.96784	Electrical machinery and equipment manufacturing		22.3897	0.0405964	3.21888	0.85311	0.362826	1.79176	0.380414	0	320000	0	0.0359622	0.287657
600105	2019	9	1.767	3.92553	Electrical machinery and equipment manufacturing		22.5213	0.0104075	3.2581	0.888667	0.409544	1.79176	0.369423	0	320000	0	0.0334312	0.287657
600105	2020	2	1.5	4.11878	Electrical machinery and equipment manufacturing		22.6935	-0.0856052	3.29584	0.842781	0.471716	1.60944	0.326804	0	320000	0	0.0550573	0.336472
600105	2022	5	1.8	3.95624	Electrical machinery and equipment manufacturing		22.7683	0.0290177	3.3673	0.798304	0.473609	1.60944	0.307786	0	320000	0	0.0635201	0.336472
600105	2023	6	1.764	4.03565	Electrical machinery and equipment manufacturing		22.8501	0.0134774	3.4012	0.936462	0.487329	1.60944	0.295477	0	320000	0	0.0350462	0.336472
600110	2012	1	1	3.45104	Electrical machinery and equipment manufacturing		22.3886	0.00116162	2.94444	0.857766	0.476485	2.19722	0.170876	0	220000	0	0.1603	0.287657
600110	2013	1	1	3.38535	Electrical machinery and equipment manufacturing		22.5848	0.000227927	2.99573	1.01779	0.517725	2.19722	0.168673	0.2	220000	0	0.103741	0.287657
600110	2014	1	1	3.29543	Electrical machinery and equipment manufacturing		22.6582	-0.0421336	3.04452	1.02529	0.553638	2.19722	0.124539	0.2	220000	0	0.175317	0.287657
600152	2018	1	1	3.61749	Electrical machinery and equipment manufacturing		21.628	0.022568	3.2581	0.839575	0.367256	2.19722	0.436879	0	330000	0	0.156013	0.287657
600152	2019	1	1	3.74998	Electrical machinery and equipment manufacturing		21.7242	-0.0239497	3.29584	0.873988	0.412103	2.19722	0.425025	0	330000	0	0.14747	0.287657
600192	2013	1	1	3.85874	Electrical machinery and equipment manufacturing		22.0592	0.020353	2.77259	0.806729	0.414905	2.19722	0.398421	0.166667	620000	1	0.0986344	0.287657
600192	2014	1	1	3.79653	Electrical machinery and equipment manufacturing		22.1642	0.0192913	2.83321	0.933501	0.435552	2.19722	0.323532	0.142857	620000	1	0	0.287657
600192	2015	1	1	3.85306	Electrical machinery and equipment manufacturing		22.2633	0.0096426	2.89037	0.940157	0.458203	2.07944	0.349062	0.142857	620000	1	0.0594706	0.318454
600192	2016	1	1	3.74153	Electrical machinery and equipment manufacturing		22.258	0.00587271	2.94444	0.892065	0.439476	2.19722	0.355843	0.142857	620000	1	0.36417	0.287657
600192	2017	1	1	3.80385	Electrical machinery and equipment manufacturing		22.2686	0.00637459	2.99573	0.775313	0.443445	2.19722	0.363762	0.166667	620000	1	0.491121	0.287657
600192	2018	2	1.5	3.8247	Electrical machinery and equipment manufacturing		22.2627	0.00430467	3.04452	0.672504	0.443604	2.19722	0.352208	0.166667	620000	1	0.201143	0.287657
600192	2019	3	1.667	3.81724	Electrical machinery and equipment manufacturing		22.2488	0.0040794	3.09104	0.7134	0.436354	2.19722	0.357186	0.2	620000	1	0.239086	0.287657
600192	2020	4	1.465	3.9282	Electrical machinery and equipment manufacturing		22.2732	-0.0465768	3.13549	0.738868	0.473138	2.19722	0.348457	0.25	620000	1	0.131034	0.287657
600192	2021	4	1.594	3.99891	Electrical machinery and equipment manufacturing		22.2669	-0.0318209	3.17805	0.780235	0.489148	2.19722	0.348672	0.25	620000	1	0.207397	0.287657
600223	2023	5	1.8	3.69321	Electrical machinery and equipment manufacturing		22.7797	0.0457703	3.43399	0.975902	0.337436	1.60944	0.44521	0	370000	1	0.0920528	0.336472
600261	2017	5	1.6	3.83447	Electrical machinery and equipment manufacturing		22.5946	0.0618238	3.04452	0.991992	0.38036	2.19722	0.386131	0.5	330000	0	0.112944	0.287657
600261	2018	8	1.726	3.82558	Electrical machinery and equipment manufacturing		22.6108	0.0582963	3.09104	0.781273	0.3607	2.19722	0.392029	0.571429	330000	0	0.0817671	0.287657
600261	2019	7	1.646	3.8016	Electrical machinery and equipment manufacturing		22.5701	0.0758528	3.13549	0.914254	0.341427	2.07944	0.428965	0.5	330000	0	0.089928	0.318454
600261	2020	6	1.694	3.86185	Electrical machinery and equipment manufacturing		22.5917	0.07218	3.17805	0.79569	0.3301	2.19722	0.389561	0.5	330000	0	0.110414	0.287657
600261	2021	6	1.694	4.06539	Electrical machinery and equipment manufacturing		22.5396	0.0498801	3.21888	0.888631	0.334714	1.94591	0.397358	0.285714	330000	0	0.0490475	0.356695
600261	2022	3	1.389	3.96002	Electrical machinery and equipment manufacturing		22.4405	0.0313432	3.2581	0.77071	0.300843	2.07944	0.395802	0.142857	330000	0	0.0550396	0.318454
600261	2023	6	1.694	3.84815	Electrical machinery and equipment manufacturing		22.4066	0.0398913	3.29584	0.769828	0.280747	2.19722	0.399316	0.571429	330000	0	0.0946033	0.287657
600268	2012	2	1.5	3.91951	Electrical machinery and equipment manufacturing		22.8836	0.0348695	2.63906	0.722497	0.489292	2.3979	0.476931	0.222222	320000	1	0	0.310128
600268	2013	2	1.5	3.99072	Electrical machinery and equipment manufacturing		23.0475	0.0122529	2.70805	0.694865	0.523709	2.3979	0.459737	0.428571	320000	1	0.0466285	0.310128
600268	2014	7	1.592	3.93761	Electrical machinery and equipment manufacturing		23.064	-0.0270429	2.77259	0.783447	0.553643	2.3979	0.435578	0.428571	320000	1	0.0825415	0.310128
600268	2015	8	1.737	3.98653	Electrical machinery and equipment manufacturing		23.1231	0.0138495	2.83321	0.844865	0.563291	2.48491	0.428299	0.333333	320000	1	0.120862	0.34833
600268	2016	6	1.616	3.94842	Electrical machinery and equipment manufacturing		23.1312	0.0138247	2.89037	0.824893	0.568688	2.3979	0.434529	0.5	320000	1	0.157199	0.310128
600268	2017	9	1.692	3.97099	Electrical machinery and equipment manufacturing		22.9851	0.0162169	2.94444	0.735615	0.53165	2.3979	0.449386	0.428571	320000	1	0.223752	0.310128
600268	2018	13	1.76	4.05107	Electrical machinery and equipment manufacturing		22.9384	0.0212826	2.99573	0.689315	0.512769	2.19722	0.445637	0.6	320000	1	0.0927694	0.367694
600268	2019	18	1.865	3.97099	Electrical machinery and equipment manufacturing		22.898	0.0241086	3.04452	0.717677	0.499706	2.19722	0.445669	0.6	320000	1	0.167011	0.367694
600268	2020	6	1.659	4.00149	Electrical machinery and equipment manufacturing		22.8838	0.0270636	3.09104	0.802363	0.489913	2.19722	0.443531	0.6	320000	1	0.113824	0.367694
600268	2021	13	1.821	4.06643	Electrical machinery and equipment manufacturing		22.9536	0.0459689	3.13549	0.861878	0.481193	2.19722	0.457537	0.428571	320000	1	0.097567	0.367694
600268	2022	12	1.865	4.03176	Electrical machinery and equipment manufacturing		22.9426	0.0378483	3.17805	0.782787	0.471651	2.19722	0.437754	0.5	320000	1	0.116437	0.367694
600268	2023	20	1.874	4.15184	Electrical machinery and equipment manufacturing		23.0201	0.0403811	3.21888	0.782152	0.467068	2.19722	0.444947	0.5	320000	1	0.126404	0.367694
600312	2011	3	1.389	3.90139	Special equipment manufacturing		22.3269	0.00319964	2.56495	1.03842	0.370957	2.30259	0.269499	0.625	410000	1	0	0.336472
600312	2012	5	1.446	3.93775	Electrical machinery and equipment manufacturing		22.5802	0.0209953	2.63906	0.908601	0.439021	2.19722	0.263778	0.777778	410000	1	0.0632322	0.287657
600312	2013	10	1.696	3.85893	Electrical machinery and equipment manufacturing		22.5732	0.0606057	2.70805	1.027	0.400097	2.19722	0.278008	0.8	410000	1	0.0999583	0.287657
600312	2014	7	1.639	3.85044	Electrical machinery and equipment manufacturing		23.017	0.0685622	2.77259	1.02385	0.326189	2.19722	0.410712	0.5	410000	1	0.110979	0.287657
600312	2015	6	1.546	3.82287	Electrical machinery and equipment manufacturing		23.2041	0.0691411	2.83321	1.08274	0.383469	2.19722	0.406758	0.5	410000	1	0.281433	0.287657
600312	2016	13	1.72	3.8656	Electrical machinery and equipment manufacturing		23.5982	0.0689411	2.89037	0.876818	0.386835	2.19722	0.383405	0.5	410000	1	0.139356	0.287657
600312	2017	6	1.474	3.87409	Electrical machinery and equipment manufacturing		23.6798	0.0330652	2.94444	0.800941	0.420541	2.19722	0.396938	0.75	410000	1	0.167709	0.287657
600312	2018	13	1.75	3.90645	Electrical machinery and equipment manufacturing		23.8354	0.0114301	2.99573	0.731343	0.463679	2.19722	0.399935	0.714286	410000	1	0.198847	0.287657
600312	2019	17	1.792	3.95698	Electrical machinery and equipment manufacturing		23.8455	0.0100724	3.04452	0.680343	0.462684	2.19722	0.399935	0.714286	410000	1	0.165332	0.287657
600312	2020	10	1.678	3.96237	Electrical machinery and equipment manufacturing		23.7558	0.00657435	3.09104	0.700475	0.436844	2.19722	0.399935	0.75	410000	1	0.115335	0.287657
600312	2021	9	1.769	3.88581	Electrical machinery and equipment manufacturing		23.6769	0.00625834	3.13549	0.764631	0.408764	2.19722	0.394997	0.7	410000	1	0.0818117	0.287657
600312	2022	9	1.73	3.82653	Electrical machinery and equipment manufacturing		23.6051	0.0166923	3.17805	0.720616	0.374517	2.07944	0.402596	0.5	410000	1	0.0935136	0.318454
600312	2023	24	1.853	3.90597	Electrical machinery and equipment manufacturing		23.7269	0.0446632	3.21888	0.847513	0.39182	2.19722	0.438685	0.2	410000	1	0.126402	0.287657
600336	2011	1	1	3.73682	Electrical machinery and equipment manufacturing		21.7169	0.0134572	2.63906	0.839965	0.574119	1.94591	0.416333	0	370000	1	0.081578	0.356695
600336	2012	1	1	3.82466	Electrical machinery and equipment manufacturing		21.785	0.0556436	2.70805	0.830157	0.549925	1.94591	0.405736	0	370000	1	0.0280052	0.356695
600336	2013	2	0.875	3.91888	Electrical machinery and equipment manufacturing		21.9075	0.0453632	2.77259	1.02691	0.539868	1.94591	0.373231	0	370000	1	0.175067	0.356695
600336	2014	2	0.875	3.90093	Electrical machinery and equipment manufacturing		21.8242	0.0232826	2.83321	1.06472	0.501089	1.94591	0.381499	0	370000	1	0.120374	0.356695
600336	2015	2	0.875	3.86879	Electrical machinery and equipment manufacturing		21.7632	0.00444886	2.89037	1.28127	0.484951	2.19722	0.360295	0	370000	1	0	0.287657
600336	2016	2	0.875	3.96644	Electrical machinery and equipment manufacturing		22.1488	0.00539126	2.94444	1.0722	0.439289	2.19722	0.404786	0.166667	370000	1	0	0.287657
600336	2018	1	1	4.00656	Electrical machinery and equipment manufacturing		22.3554	0.0145548	3.04452	0.752108	0.473749	2.19722	0.40551	0	370000	1	0.18715	0.287657
600336	2019	2	1.5	4.00121	Electrical machinery and equipment manufacturing		22.6249	0.0295164	3.09104	0.783824	0.513658	2.19722	0.407456	0	370000	1	0.170991	0.287657
600336	2020	2	1.5	4.04876	Electrical machinery and equipment manufacturing		22.7659	0.056216	3.13549	0.986116	0.508539	2.19722	0.386997	0	370000	1	0.191496	0.287657
600336	2021	6	1.641	4.063	Electrical machinery and equipment manufacturing		22.7491	0.0284982	3.17805	0.875547	0.5021	2.07944	0.374213	0	370000	1	0.108696	0.318454
600336	2022	5	1.618	4.04282	Electrical machinery and equipment manufacturing		22.7507	0.020902	3.21888	0.796468	0.49643	2.19722	0.373532	0	370000	1	0.202749	0.287657
600336	2023	6	1.659	3.8996	Electrical machinery and equipment manufacturing		22.7929	0.00829259	3.2581	0.817108	0.504698	2.19722	0.375569	0	370000	1	0.115832	0.287657
600438	2023	4	1.296	3.71839	Electrical machinery and equipment manufacturing		25.8253	0.105271	3.3673	0.804866	0.438781	2.19722	0.412772	0.375	510000	0	0.271192	0.287657
600478	2021	1	1	3.90123	Electrical machinery and equipment manufacturing		22.5683	0.000816029	3.17805	1.20552	0.416539	1.94591	0.293037	0.125	430000	0	0.162607	0.356695
600481	2015	2	0.875	3.64945	Chemical raw materials and chemical products manufacturing		22.2197	0.0730129	3.04452	1.56479	0.401434	2.19722	0.439921	0.5	320000	0	0.0481325	0.287657
600481	2019	3	1.389	3.81728	Electrical machinery and equipment manufacturing		22.0728	0.0541484	3.21888	1.03274	0.339275	2.19722	0.432825	0.666667	320000	0	0.162873	0.287657
600481	2020	2	0.875	3.77043	Electrical machinery and equipment manufacturing		22.1364	0.0324772	3.2581	1.09987	0.379505	2.19722	0.422362	0.5	320000	0	0.108302	0.287657
600481	2021	2	1.5	3.77838	Electrical machinery and equipment manufacturing		22.9195	0.0370771	3.29584	1.26619	0.546142	2.07944	0.41613	0.5	320000	0	0.0829073	0.318454
600481	2022	1	1	3.70216	Electrical machinery and equipment manufacturing		23.8117	0.0465698	3.3322	0.987863	0.521705	2.07944	0.380273	0.5	320000	0	0.0515977	0.318454
600481	2023	8	1.875	3.69257	General equipment manufacturing		24.1275	0.0519064	3.3673	0.828732	0.567853	2.07944	0.383626	0.5	320000	0	0.114221	0.318454
600487	2011	4	1.75	3.94546	Computer, communication, and other electronic equipment manufacturing		22.782	0.0380704	2.94444	0.735523	0.518671	2.19722	0.399454	0.363636	320000	0	0	0.287657
600487	2012	2	1.5	3.95087	Electrical machinery and equipment manufacturing		22.936	0.0425252	2.99573	0.754457	0.525951	2.19722	0.399904	0.272727	320000	0	0	0.287657
600487	2013	3	1.667	3.96918	Electrical machinery and equipment manufacturing		23.0231	0.0322354	3.04452	0.742295	0.52285	2.19722	0.39779	0.333333	320000	0	0.0231011	0.287657
600487	2014	5	1.8	4.0365	Electrical machinery and equipment manufacturing		23.24	0.0304825	3.09104	0.794423	0.489574	2.19722	0.414768	0.333333	320000	0	0.125576	0.287657
600487	2015	2	1.5	3.98687	Electrical machinery and equipment manufacturing		23.463	0.0438053	3.13549	1.0534	0.505145	2.19722	0.299788	0.444444	320000	0	0.0241441	0.287657
600487	2016	1	1	4.18356	Electrical machinery and equipment manufacturing		23.7056	0.074348	3.17805	1.01868	0.504406	2.19722	0.292145	0.444444	320000	0	0.18374	0.287657
600487	2017	5	1.7	4.22974	Electrical machinery and equipment manufacturing		24.0636	0.0762228	3.21888	1.22953	0.475057	2.19722	0.29641	0.666667	320000	0	0.210367	0.287657
600487	2018	6	1.833	4.11928	Electrical machinery and equipment manufacturing		24.3168	0.0702763	3.2581	0.920064	0.487788	2.48491	0.298098	0.571429	320000	0	0.167982	0.287657
600487	2019	8	1.836	4.13137	Electrical machinery and equipment manufacturing		24.4429	0.0319593	3.29584	0.851552	0.470525	2.3979	0.29938	0.5	320000	0	0.164428	0.310128
600487	2020	9	1.827	4.1282	Electrical machinery and equipment manufacturing		24.6045	0.0236233	3.3322	0.770773	0.41777	2.3979	0.283156	0.4	320000	0	0.194843	0.310128
600487	2022	9	1.823	4.04464	Electrical machinery and equipment manufacturing		24.7428	0.0281713	3.4012	0.781168	0.4166	2.48491	0.273058	0.285714	320000	0	0.0100991	0.287657
600487	2023	9	1.792	4.1062	Electrical machinery and equipment manufacturing		24.8583	0.0350134	3.43399	0.703764	0.438275	2.48491	0.273774	0.285714	320000	0	0.0689842	0.287657
600520	2023	1	1	3.85075	Special equipment manufacturing		20.2102	-0.144698	3.17805	2.04864	0.342853	2.19722	0.213992	0.285714	340000	0	0.0940719	0.287657
600522	2012	5	1.7	3.93203	Electrical machinery and equipment manufacturing		22.7868	0.0552178	2.83321	0.742112	0.332487	2.19722	0.295094	0.125	320000	0	0.178834	0.287657
600522	2013	3	1.074	3.87861	Electrical machinery and equipment manufacturing		22.9189	0.0597946	2.89037	0.807388	0.32631	2.19722	0.233648	0.142857	320000	0	0.136825	0.287657
600522	2014	6	1.616	3.85032	Electrical machinery and equipment manufacturing		23.1913	0.0489053	2.94444	0.857214	0.271064	2.19722	0.247752	0.142857	320000	0	0.0285897	0.287657
600522	2015	5	1.7	3.96166	Electrical machinery and equipment manufacturing		23.4771	0.0623822	2.99573	0.997542	0.291428	2.19722	0.319889	0.142857	320000	0	0.0390065	0.287657
600522	2016	9	1.802	3.965	Electrical machinery and equipment manufacturing		23.7414	0.0751154	3.04452	0.976934	0.342686	2.19722	0.310526	0.142857	320000	0	0.184828	0.287657
600522	2017	18	1.882	3.98574	Electrical machinery and equipment manufacturing		24.012	0.064901	3.09104	0.990119	0.290668	2.19722	0.306909	0.142857	320000	0	0.190036	0.287657
600522	2018	25	1.882	4.05606	Electrical machinery and equipment manufacturing		24.1892	0.0644408	3.13549	0.775708	0.330305	2.19722	0.28815	0.142857	320000	0	0.15562	0.287657
600522	2019	24	1.911	4.08609	Electrical machinery and equipment manufacturing		24.417	0.0478078	3.17805	0.74122	0.382095	2.19722	0.289122	0.2	320000	0	0.105486	0.287657
600522	2020	27	1.921	4.14168	Electrical machinery and equipment manufacturing		24.5765	0.0490517	3.21888	0.784131	0.395758	2.19722	0.30382	0.142857	320000	0	0.111188	0.287657
600522	2021	27	1.922	4.10721	Electrical machinery and equipment manufacturing		24.5439	0.00615913	3.2581	0.978555	0.330822	2.19722	0.286061	0.142857	320000	0	0	0.287657
600522	2022	29	1.929	4.00865	Electrical machinery and equipment manufacturing		24.6083	0.0677839	3.29584	0.912021	0.305162	2.19722	0.298663	0.142857	320000	0	0.0104625	0.287657
600522	2023	33	1.937	4.05109	Electrical machinery and equipment manufacturing		24.7257	0.0574928	3.3322	0.763692	0.312856	2.19722	0.286111	0	320000	0	0.101433	0.287657
600525	2012	3	1.389	3.91426	Computer, communication, and other electronic equipment manufacturing		22.1764	0.0508203	3.29584	0.997666	0.361746	2.19722	0.416626	0	440000	0	0.0612561	0.287657
600525	2013	6	1.631	3.87839	Computer, communication, and other electronic equipment manufacturing		22.2854	0.0633345	3.3322	1.11143	0.362058	2.19722	0.317055	0	440000	0	0	0.287657
600525	2014	6	1.468	3.85362	Computer, communication, and other electronic equipment manufacturing		22.5602	0.059821	3.3673	1.13111	0.417764	2.19722	0.22063	0	440000	0	0.0607536	0.287657
600525	2015	4	1.234	3.94524	Computer, communication, and other electronic equipment manufacturing		22.9578	0.0534226	3.4012	1.18347	0.336218	2.07944	0.200865	0	440000	0	0.185028	0.318454
600525	2016	4	1.234	3.89407	Computer, communication, and other electronic equipment manufacturing		23.4718	0.0441795	3.43399	0.950525	0.419905	2.19722	0.200667	0	440000	0	0.115126	0.287657
600525	2017	4	1.234	3.97177	Computer, communication, and other electronic equipment manufacturing		23.7455	0.057436	3.46574	0.948403	0.469973	2.19722	0.254313	0	440000	0	0.0972268	0.287657
600525	2018	5	1.47	3.99599	Computer, communication, and other electronic equipment manufacturing		23.6168	-0.000774549	3.49651	0.699629	0.525845	2.19722	0.208656	0.166667	440000	0	0.122402	0.287657
600525	2019	1	1	3.98083	Computer, communication, and other electronic equipment manufacturing		23.1258	-0.090594	3.52636	0.841047	0.481283	2.19722	0.291375	0	440000	0	0.102747	0.287657
600537	2016	1	1	3.36968	Electrical machinery and equipment manufacturing		22.6823	0.0494057	3.49651	1.03131	0.452592	2.19722	0.293239	0.2	330000	0	0.334407	0.287657
600550	2013	3	1.074	3.83651	Electrical machinery and equipment manufacturing		23.0185	-0.186873	2.70805	0.989888	0.637179	2.48491	0.43517	0.2	130000	1	0.24686	0.34833
600550	2016	14	1.761	3.83227	Electrical machinery and equipment manufacturing		22.9905	0.0112983	2.89037	1.03331	0.634951	2.19722	0.469599	0.4	130000	1	0	0.367694
600550	2017	6	1.522	3.96222	Electrical machinery and equipment manufacturing		22.9306	0.00784709	2.94444	1.05519	0.635578	2.19722	0.466708	0.5	130000	1	0.2057	0.367694
600550	2018	7	1.533	3.89507	Electrical machinery and equipment manufacturing		22.7082	-0.122632	2.99573	0.979965	0.623886	2.19722	0.507074	0.25	130000	1	0.222458	0.287657
600550	2019	1	1	3.88309	Electrical machinery and equipment manufacturing		22.6314	0.00255784	3.04452	0.957189	0.632712	2.19722	0.507139	0	130000	1	0.223366	0.287657
600550	2020	15	1.785	3.97062	Electrical machinery and equipment manufacturing		22.4533	0.0044215	3.09104	1.18649	0.623668	2.07944	0.508553	0	130000	1	0.184685	0.318454
600550	2021	10	1.787	3.80206	Electrical machinery and equipment manufacturing		22.4727	0.00990298	3.13549	1.29435	0.619932	2.19722	0.503528	0	130000	1	0.13921	0.287657
600550	2022	3	1.389	3.80156	Electrical machinery and equipment manufacturing		22.4146	0.00881472	3.17805	1.22952	0.610637	2.19722	0.502251	0.142857	130000	1	0.213712	0.287657
600550	2023	7	1.524	3.84825	Electrical machinery and equipment manufacturing		22.5602	-0.0304926	3.21888	1.20501	0.637895	2.07944	0.463482	0.166667	130000	1	0.17006	0.318454
600580	2011	11	1.888	3.86895	Electrical machinery and equipment manufacturing		22.2971	0.026648	2.83321	0.768189	0.361895	2.19722	0.309906	0.125	330000	0	0	0.287657
600580	2012	7	1.806	3.89901	Electrical machinery and equipment manufacturing		22.2863	0.0280198	2.89037	0.724876	0.347656	2.19722	0.27797	0.125	330000	0	0.131596	0.287657
600580	2013	10	1.9	3.83256	Electrical machinery and equipment manufacturing		22.9081	0.0447208	2.94444	0.793707	0.446801	2.19722	0.457498	0.142857	330000	0	0.134121	0.287657
600580	2014	9	1.889	3.83808	Electrical machinery and equipment manufacturing		23.005	0.0474559	2.99573	0.905881	0.455666	2.19722	0.452713	0.2	330000	0	0.0522585	0.287657
600580	2015	10	1.875	3.98838	Electrical machinery and equipment manufacturing		23.367	0.030433	3.04452	0.930223	0.498662	2.19722	0.451176	0.2	330000	0	0.0906623	0.287657
600580	2016	10	1.9	3.98816	Electrical machinery and equipment manufacturing		23.5009	0.0177451	3.09104	0.845759	0.502818	2.19722	0.439466	0	330000	0	0.119474	0.287657
600580	2017	11	1.909	3.94738	Electrical machinery and equipment manufacturing		23.5432	0.0392433	3.13549	0.797367	0.494421	2.19722	0.439466	0	330000	0	0.154492	0.287657
600580	2018	10	1.854	4.06601	Electrical machinery and equipment manufacturing		23.6386	0.0366036	3.17805	0.73148	0.500463	2.19722	0.438225	0	330000	0	0.171358	0.287657
600580	2019	9	1.889	4.0513	Electrical machinery and equipment manufacturing		23.7041	0.0498994	3.21888	0.880254	0.48455	2.19722	0.428659	0	330000	0	0.207946	0.287657
600580	2020	13	1.877	4.03376	Electrical machinery and equipment manufacturing		23.759	0.0433674	3.2581	0.950266	0.474258	2.19722	0.358332	0	330000	0	0.126967	0.287657
600580	2021	16	1.899	3.92297	Electrical machinery and equipment manufacturing		23.8149	0.0469104	3.29584	0.985482	0.46463	2.07944	0.361308	0.333333	330000	0	0.088475	0.318454
600580	2022	15	1.913	4.09575	Electrical machinery and equipment manufacturing		23.878	0.0351416	3.3322	0.817509	0.449458	2.19722	0.347236	0.25	330000	0	0.158534	0.287657
600580	2023	18	1.913	4.0392	Electrical machinery and equipment manufacturing		23.9286	0.0221684	3.3673	0.783562	0.448576	2.19722	0.342733	0.166667	330000	0	0.126698	0.287657
600590	2016	1	1	3.9601	Electrical machinery and equipment manufacturing		22.8736	0.0158682	3.04452	1.01248	0.433367	1.94591	0.351899	0	360000	0	0.117132	0.356695
600590	2017	1	1	4.07798	Electrical machinery and equipment manufacturing		23.076	0.0243656	3.09104	0.804861	0.489125	1.94591	0.367966	0	360000	0	0.122231	0.356695
600590	2023	2	0.875	3.9294	Electrical machinery and equipment manufacturing		23.333	0.00971449	3.3322	0.740368	0.518045	1.94591	0.355752	0.285714	360000	0	0.144217	0.356695
600651	2016	1	1	3.57224	Electrical machinery and equipment manufacturing		23.195	0.0273189	3.49651	0.889429	0.517493	2.3979	0.365816	0.0833333	310000	1	0.0431287	0.310128
600651	2017	1	1	3.825	Electrical machinery and equipment manufacturing		23.4675	0.00197924	3.52636	0.821542	0.571052	2.3979	0.362179	0.0833333	310000	1	0.203097	0.310128
600651	2018	1	1	3.90158	Electrical machinery and equipment manufacturing		23.2154	-0.322302	3.55535	0.8062	0.645882	2.3979	0.365572	0.111111	310000	1	0.23734	0.310128
600690	2011	5	1.41	3.99146	Electrical machinery and equipment manufacturing		24.4052	0.0878518	3.13549	0.838609	0.536212	2.19722	0.406363	0	370000	0	0	0.287657
600690	2012	6	1.562	4.03911	Electrical machinery and equipment manufacturing		24.629	0.0841199	3.17805	0.881148	0.524457	2.19722	0.398234	0	370000	0	0	0.287657
600690	2013	6	1.483	4.10032	Electrical machinery and equipment manufacturing		24.8344	0.0870772	3.21888	0.932897	0.514207	2.19722	0.397723	0	370000	0	0	0.287657
600690	2014	9	1.654	4.137	Electrical machinery and equipment manufacturing		25.0408	0.0854641	3.2581	0.845174	0.477331	2.3979	0.441634	0	370000	0	0	0.310128
600690	2015	8	1.836	4.25143	Electrical machinery and equipment manufacturing		25.0535	0.0750728	3.29584	0.815981	0.45326	2.3979	0.447099	0	370000	0	0.0336959	0.310128
600690	2016	5	1.8	4.16399	Electrical machinery and equipment manufacturing		25.6004	0.0497226	3.3322	0.768025	0.538646	2.19722	0.457249	0.333333	370000	0	0.053422	0.287657
600690	2017	4	1.75	4.21786	Electrical machinery and equipment manufacturing		25.7436	0.0580438	3.3673	0.895998	0.525523	2.19722	0.460755	0.333333	370000	0	0.0628743	0.287657
600690	2018	4	1.75	4.1962	Electrical machinery and equipment manufacturing		25.8395	0.0569587	3.4012	0.78388	0.512395	2.19722	0.417519	0.333333	370000	0	0.0463117	0.287657
600690	2019	36	1.938	4.22414	Electrical machinery and equipment manufacturing		25.9568	0.0637252	3.43399	0.843218	0.502775	2.19722	0.430902	0	370000	0	0.0585647	0.287657
600690	2020	20	1.809	4.19799	Electrical machinery and equipment manufacturing		26.0387	0.0541571	3.46574	0.98274	0.509967	2.07944	0.452277	0	370000	0	0.0414653	0.318454
600690	2021	15	1.717	4.24622	Electrical machinery and equipment manufacturing		26.1053	0.059004	3.49651	0.961969	0.486821	2.3979	0.452192	0	370000	0	0.0214762	0.310128
600690	2022	18	1.808	4.23346	Electrical machinery and equipment manufacturing		26.1864	0.0605929	3.52636	0.869656	0.469005	2.19722	0.479765	0.181818	370000	0	0.0341914	0.367694
600690	2023	39	1.836	4.1857	Electrical machinery and equipment manufacturing		26.2582	0.0639466	3.55535	0.808018	0.458692	2.19722	0.472095	0.181818	370000	0	0.0808121	0.367694
600835	2018	1	1	3.88478	General equipment manufacturing		24.2396	0.0615153	3.2581	0.709415	0.476205	2.19722	0.437344	0.333333	310000	1	0	0.287657
600835	2020	1	1	3.94121	General equipment manufacturing		24.3115	0.0481884	3.3322	0.739131	0.471416	2.19722	0.488092	0.25	310000	1	0.0282345	0.287657
600835	2021	1	1	3.94277	General equipment manufacturing		24.3399	0.0310253	3.3673	0.694279	0.474175	2.19722	0.47981	0.166667	310000	1	0.0463314	0.287657
600835	2022	2	0.875	3.91413	General equipment manufacturing		24.3478	0.0400831	3.4012	0.624199	0.460263	2.07944	0.448242	0.166667	310000	1	0.0925301	0.318454
600875	2011	1	1	3.44048	Electrical machinery and equipment manufacturing		25.1354	0.0371251	2.94444	0.83129	0.600388	2.19722	0.522945	0.5	510000	1	0.370018	0.287657
600875	2012	3	1.667	3.37369	General equipment manufacturing		25.0842	0.028367	2.99573	0.751247	0.58151	2.19722	0.52287	0.5	510000	1	0.228622	0.287657
600875	2013	6	1.764	3.38551	General equipment manufacturing		25.0779	0.0303605	3.04452	0.72772	0.565952	2.19722	0.52261	0.5	510000	1	0	0.287657
600875	2014	3	1.074	3.30691	General equipment manufacturing		25.1758	0.015267	3.09104	0.789396	0.566193	2.19722	0.519375	0.666667	510000	1	0.155957	0.287657
600875	2015	5	1.487	3.3855	General equipment manufacturing		25.1792	0.00532048	3.13549	0.731463	0.543269	2.19722	0.469412	0.666667	510000	1	0.105606	0.287657
600875	2016	7	1.748	3.26665	General equipment manufacturing		25.1624	-0.0209907	3.17805	0.708809	0.553457	2.07944	0.468225	1	510000	1	0.243722	0.318454
600875	2017	2	1.5	3.43468	General equipment manufacturing		25.0917	0.00861789	3.21888	0.711787	0.537375	2.07944	0.467631	1	510000	1	0.278303	0.318454
600875	2018	2	0.875	3.49602	General equipment manufacturing		25.2377	0.0126034	3.2581	0.670583	0.509163	1.79176	0.528149	0.875	510000	1	0.16262	0.405465
600875	2019	2	1.5	3.55544	General equipment manufacturing		25.2188	0.0152908	3.29584	0.680838	0.497851	2.07944	0.528331	0.857143	510000	1	0.0486004	0.318454
600875	2020	15	1.9	3.582	General equipment manufacturing		25.3061	0.0194052	3.3322	0.684808	0.504405	1.94591	0.521544	1	510000	1	0.0604414	0.356695
600875	2021	9	1.827	3.65855	General equipment manufacturing		25.359	0.0232875	3.3673	0.786249	0.504897	1.79176	0.512289	1	510000	1	0.0122401	0.405465
600875	2022	17	1.891	3.77658	General equipment manufacturing		25.4705	0.0257816	3.4012	0.765611	0.509767	2.07944	0.517275	0.666667	510000	1	0.0340923	0.318454
601126	2014	34	1.911	3.93705	Electrical machinery and equipment manufacturing		22.3477	0.0640431	3.04452	0.995987	0.278765	2.19722	0.465868	0.666667	110000	0	0.0188082	0.287657
601126	2016	28	1.904	3.97294	Electrical machinery and equipment manufacturing		22.4322	0.0500558	3.13549	1.00622	0.264408	1.94591	0.448107	0.428571	110000	0	0.021497	0.356695
601126	2017	40	1.92	4.07609	Electrical machinery and equipment manufacturing		22.4295	0.0409481	3.17805	0.891243	0.248629	1.94591	0.471395	0.5	110000	0	0.0435514	0.356695
601126	2021	10	1.73	4.03257	Electrical machinery and equipment manufacturing		22.7208	0.0595683	3.3322	1.31518	0.38828	1.94591	0.453053	0.5	110000	0	0.0839016	0.356695
601126	2022	23	1.857	4.03245	Electrical machinery and equipment manufacturing		22.8576	0.0623458	3.3673	1.06379	0.419401	1.94591	0.427735	0.555556	110000	0	0.201109	0.356695
601126	2023	35	1.901	4.06227	Electrical machinery and equipment manufacturing		22.9751	0.063971	3.4012	1.02107	0.441162	1.94591	0.421389	0.444444	110000	0	0.208581	0.356695
601179	2012	6	1.833	3.8078	Electrical machinery and equipment manufacturing		24.0986	0.00308625	1.60944	0.695769	0.403438	1.94591	0.533342	0.428571	610000	1	0.162548	0.356695
601179	2013	5	1.8	3.87602	Electrical machinery and equipment manufacturing		24.2045	0.00919127	1.79176	0.671153	0.3598	2.07944	0.551579	0.428571	610000	1	0.190181	0.318454
601179	2014	8	1.875	3.92366	Electrical machinery and equipment manufacturing		24.1542	0.0211773	1.94591	0.947063	0.330331	2.07944	0.54231	0.5	610000	1	0.257015	0.318454
601179	2015	8	1.875	4.01364	Electrical machinery and equipment manufacturing		24.2063	0.0273393	2.07944	0.878663	0.341784	2.07944	0.530496	0.5	610000	1	0.337354	0.318454
601179	2016	12	1.899	3.88353	Electrical machinery and equipment manufacturing		24.2689	0.032199	2.19722	0.808822	0.35072	2.07944	0.544433	0.428571	610000	1	0.13493	0.318454
601179	2017	10	1.789	3.82621	Electrical machinery and equipment manufacturing		24.2407	0.0255277	2.30259	0.722491	0.332765	2.19722	0.542921	0.5	610000	1	0.239662	0.287657
601179	2018	26	1.912	4.02329	Electrical machinery and equipment manufacturing		24.2655	0.0154779	2.3979	0.641851	0.337464	2.19722	0.545261	0.5	610000	1	0.16015	0.287657
601179	2019	27	1.907	3.93333	Electrical machinery and equipment manufacturing		24.2891	0.00959238	2.48491	0.662353	0.344865	2.19722	0.548515	0.333333	610000	1	0.0598265	0.287657
601179	2020	27	1.911	3.85704	Electrical machinery and equipment manufacturing		24.3113	0.00742537	2.56495	0.730919	0.353174	2.07944	0.526981	0.5	610000	1	0.0696822	0.318454
601179	2021	28	1.903	3.96422	Electrical machinery and equipment manufacturing		24.3836	0.01539	2.63906	0.76955	0.355552	2.07944	0.512303	0.285714	610000	1	0.0797507	0.318454
601179	2022	27	1.908	3.9205	Electrical machinery and equipment manufacturing		24.433	0.0173196	2.70805	0.701515	0.363423	2.19722	0.518166	0.166667	610000	1	0.181245	0.287657
601179	2023	35	1.926	3.91834	Electrical machinery and equipment manufacturing		24.5024	0.0230309	2.77259	0.702744	0.366067	2.19722	0.525557	0.2	610000	1	0.080548	0.287657
601222	2015	2	1.5	4.05697	Instrumentation manufacturing		22.6726	0.0720066	3.04452	1.17076	0.243397	1.94591	0.49061	0.25	320000	0	0.107476	0.356695
601222	2016	7	1.638	3.94075	Instrumentation manufacturing		23.2611	0.0387801	3.09104	0.864362	0.297075	1.94591	0.423089	0.222222	320000	0	0.126545	0.356695
601222	2017	7	1.646	3.92522	Instrumentation manufacturing		23.5431	0.0417079	3.13549	0.914701	0.361686	1.94591	0.419048	0.222222	320000	0	0.13695	0.356695
601222	2018	4	1.594	3.95137	Instrumentation manufacturing		23.5837	0.0428656	3.17805	0.652324	0.357745	1.94591	0.4154	0.285714	320000	0	0.0897463	0.356695
601222	2019	6	1.685	4.13528	Instrumentation manufacturing		23.5836	0.0394814	3.21888	0.641314	0.343196	1.94591	0.416472	0.285714	320000	0	0.145663	0.356695
601222	2020	13	1.793	4.13872	Instrumentation manufacturing		23.7094	0.0493227	3.2581	0.762902	0.368294	1.94591	0.425493	0.285714	320000	0	0.140843	0.356695
601222	2021	5	1.8	4.02731	Instrumentation manufacturing		23.7441	0.044442	3.29584	0.921325	0.25785	1.94591	0.354932	0.285714	320000	0	0.0240743	0.356695
601222	2022	6	1.604	3.91245	Instrumentation manufacturing		23.782	0.0397684	3.3322	0.757447	0.263907	1.94591	0.357015	0.166667	320000	0	0.0216881	0.356695
601222	2023	2	1.5	3.89616	Electrical machinery and equipment manufacturing		23.8668	0.0442513	3.3673	0.639571	0.283588	1.94591	0.3501	0.166667	320000	0	0.0986279	0.356695
601369	2012	1	1	3.79784	Electrical machinery and equipment manufacturing		23.4159	0.0671766	2.63906	0.791156	0.475884	2.19722	0.548499	0.571429	610000	1	0.0813677	0.287657
601369	2016	1	1	3.85363	Electrical machinery and equipment manufacturing		23.4075	0.015084	2.89037	0.848144	0.450391	2.19722	0.542728	0.75	610000	1	0.128795	0.287657
601369	2017	2	1.5	3.95947	Electrical machinery and equipment manufacturing		23.4907	0.0154104	2.94444	0.868656	0.470814	2.07944	0.532814	0.666667	610000	1	0.13705	0.318454
601369	2019	2	1.5	3.9765	Electrical machinery and equipment manufacturing		23.7515	0.031976	3.04452	0.786281	0.506647	2.19722	0.52399	0.777778	610000	1	0.0722544	0.287657
601616	2011	1	1	3.99428	Electrical machinery and equipment manufacturing		22.0165	0.0556633	1.60944	0.77811	0.240247	2.3979	0.448457	0.5	310000	0	0	0.310128
601616	2012	1	1	3.88002	Electrical machinery and equipment manufacturing		21.903	0.01483	1.79176	0.782576	0.175349	2.3979	0.355604	0.75	310000	0	0.0735626	0.310128
601616	2013	3	1.389	3.8623	Electrical machinery and equipment manufacturing		21.9062	0.0168604	1.94591	0.788918	0.193141	2.3979	0.355604	0.75	310000	0	0.0933731	0.310128
601616	2014	3	1.389	3.87254	Electrical machinery and equipment manufacturing		21.8502	0.0133949	2.07944	1.00252	0.156011	2.07944	0.337482	0.2	310000	0	0.0936137	0.318454
601616	2015	3	1.389	3.81742	Electrical machinery and equipment manufacturing		21.8213	0.00309739	2.19722	1.345	0.142914	2.19722	0.315164	0	310000	0	0.156324	0.287657
601616	2016	2	0.875	3.88052	Electrical machinery and equipment manufacturing		21.742	-0.0417805	2.30259	1.20678	0.134286	2.19722	0.314957	0.2	310000	0	0.157227	0.287657
601616	2017	3	1.667	3.75752	Electrical machinery and equipment manufacturing		21.7397	0.00852092	2.3979	0.894435	0.11529	2.19722	0.314957	0.25	310000	0	0.0924018	0.287657
601616	2018	2	1.5	3.78621	Electrical machinery and equipment manufacturing		21.7629	0.0435925	2.48491	0.766789	0.0991324	2.07944	0.291773	0.25	310000	0	0.20471	0.318454
601616	2019	1	1	3.93497	Electrical machinery and equipment manufacturing		21.9642	0.050689	2.56495	0.714498	0.197374	1.94591	0.264649	0	310000	0	0.0718184	0.356695
601616	2020	3	1.389	3.94352	Electrical machinery and equipment manufacturing		21.9119	0.0310603	2.63906	0.73778	0.150303	1.94591	0.252122	0	310000	0	0.0883446	0.356695
601616	2021	1	1	3.86197	Electrical machinery and equipment manufacturing		21.8341	0.0362683	2.70805	0.846855	0.155093	1.94591	0.261329	0	310000	0	0.161432	0.356695
601616	2022	1	1	3.85632	Electrical machinery and equipment manufacturing		21.8417	0.027587	2.77259	0.782472	0.14017	1.94591	0.25652	0	310000	0	0.232162	0.356695
601616	2023	1	1	3.86176	Electrical machinery and equipment manufacturing		21.8256	0.0124483	2.83321	0.813832	0.121032	1.94591	0.256487	0	310000	0	0.113526	0.356695
601727	2011	3	1.389	3.73624	Electrical machinery and equipment manufacturing		25.3934	0.0412437	2.07944	0.788328	0.499039	2.19722	0.655608	0.222222	310000	1	0.41543	0.287657
601727	2012	2	1.5	3.93089	General equipment manufacturing		25.4999	0.0368814	2.19722	0.729714	0.50517	2.19722	0.655743	0.25	310000	1	0.120715	0.287657
601727	2013	5	1.7	3.94242	General equipment manufacturing		25.5853	0.0336502	2.30259	0.707127	0.512629	2.19722	0.65468	0.181818	310000	1	0.138534	0.287657
601727	2014	4	1.594	3.94736	General equipment manufacturing		25.69	0.0323904	2.3979	0.842882	0.520911	2.19722	0.639663	0.166667	310000	1	0.232524	0.287657
601727	2015	5	1.8	3.95453	General equipment manufacturing		25.8116	0.0294361	2.48491	0.902624	0.527019	2.19722	0.611908	0.2	310000	1	0.0271387	0.287657
601727	2016	6	1.764	4.05601	General equipment manufacturing		25.8917	0.0243614	2.56495	0.790171	0.513887	2.19722	0.615739	0.3	310000	1	0.0965535	0.287657
601727	2017	6	1.764	4.1593	General equipment manufacturing		26.0183	0.0248031	2.63906	0.738725	0.497881	1.94591	0.613427	0.25	310000	1	0.110732	0.356695
601727	2018	4	1.594	4.17944	General equipment manufacturing		26.1102	0.0247621	2.70805	0.691758	0.508638	2.19722	0.614557	0.384615	310000	1	0.0938423	0.287657
601727	2019	7	1.806	4.19945	General equipment manufacturing		26.3599	0.0205088	2.77259	0.673442	0.514921	2.19722	0.602278	0.416667	310000	1	0.0633524	0.287657
601727	2020	6	1.833	4.17811	General equipment manufacturing		26.4299	0.0165583	2.83321	0.663488	0.507558	2.19722	0.589879	0.363636	310000	1	0.057853	0.287657
601727	2021	15	1.87	4.18229	General equipment manufacturing		26.4297	-0.0346357	2.89037	0.663496	0.515051	2.19722	0.57123	0.222222	310000	1	0.075062	0.287657
601727	2022	10	1.875	4.04478	General equipment manufacturing		26.3863	-0.00806311	2.94444	0.645777	0.514595	2.07944	0.567688	0.272727	310000	1	0.136327	0.318454
601727	2023	11	1.888	4.03475	General equipment manufacturing		26.3697	0.00757862	2.99573	0.675852	0.547214	1.94591	0.562729	0.222222	310000	1	0.109595	0.356695
601877	2011	2	1.5	3.90822	Electrical machinery and equipment manufacturing		22.8464	0.103373	2.70805	0.82902	0.358369	2.3979	0.567113	0.4	330000	0	0.074163	0.310128
601877	2012	1	1	3.92192	Electrical machinery and equipment manufacturing		23.0158	0.132363	2.77259	0.87218	0.399387	2.3979	0.568008	0.4	330000	0	0.142922	0.310128
601877	2013	2	0.875	3.93145	Electrical machinery and equipment manufacturing		23.1218	0.142921	2.83321	1.32608	0.397206	2.3979	0.566439	0.142857	330000	0	0.127277	0.310128
601877	2014	5	1.7	3.89074	Electrical machinery and equipment manufacturing		23.2249	0.149468	2.89037	1.38324	0.386639	2.19722	0.562825	0.142857	330000	0	0.127588	0.367694
601877	2015	3	1.389	4.01972	Electrical machinery and equipment manufacturing		23.2174	0.143649	2.94444	1.43814	0.345609	1.79176	0.558504	0.142857	330000	0	0.136302	0.287657
601877	2016	4	1.594	3.93213	Electrical machinery and equipment manufacturing		24.2887	0.0714319	2.99573	0.903276	0.471556	1.79176	0.546344	0.166667	330000	0	0.161413	0.287657
601877	2017	7	1.764	4.1414	Electrical machinery and equipment manufacturing		24.511	0.0656501	3.04452	0.934439	0.427967	1.79176	0.493322	0	330000	0	0.227879	0.287657
601877	2018	5	1.618	4.04563	Electrical machinery and equipment manufacturing		24.5857	0.0760879	3.09104	0.91926	0.426857	2.19722	0.476635	0	330000	0	0.0682393	0.287657
601877	2019	6	1.685	4.0546	Electrical machinery and equipment manufacturing		24.7356	0.0693696	3.13549	0.952243	0.437359	2.19722	0.490562	0	330000	0	0.0572976	0.287657
601877	2020	10	1.772	4.1218	Electrical machinery and equipment manufacturing		24.9613	0.091484	3.17805	1.01714	0.438155	2.19722	0.482264	0	330000	0	0.0824597	0.287657
601877	2021	10	1.777	4.07406	Electrical machinery and equipment manufacturing		25.1712	0.0431309	3.21888	1.08266	0.467894	2.19722	0.463767	0	330000	0	0.0632642	0.287657
601877	2022	6	1.764	4.07381	Electrical machinery and equipment manufacturing		25.3709	0.0442439	3.2581	0.775944	0.471153	2.19722	0.459822	0.2	330000	0	0.0242966	0.287657
601877	2023	6	1.764	4.00555	Electrical machinery and equipment manufacturing		25.5174	0.0401488	3.29584	0.691979	0.479352	2.19722	0.463196	0.2	330000	0	0.0564325	0.287657
601908	2015	2	1.5	3.34305	Special equipment manufacturing		23.0815	0.0224034	2.63906	0.823657	0.352566	2.19722	0.512072	0	110000	0	0.189963	0.287657
601908	2022	1	1	3.60279	Special equipment manufacturing		23.8271	0.0192942	3.04452	0.791995	0.40269	2.19722	0.402723	0	110000	0	0.0584165	0.287657
603015	2015	1	1	3.97037	Electrical machinery and equipment manufacturing		20.8997	0.0546627	2.70805	1.16546	0.10091	2.19722	0.55568	0.5	330000	0	0.155593	0.287657
603015	2016	1	1	3.98038	Electrical machinery and equipment manufacturing		21.0475	0.0333459	2.77259	1.13267	0.168905	2.19722	0.49407	0.5	330000	0	0.115736	0.287657
603015	2017	3	1.667	3.98641	Electrical machinery and equipment manufacturing		21.173	0.0443562	2.83321	0.939679	0.21067	2.19722	0.486771	0.5	330000	0	0	0.287657
603015	2018	1	1	3.98412	Electrical machinery and equipment manufacturing		21.1898	0.0303315	2.89037	1.01178	0.211738	2.19722	0.48495	0.5	330000	0	0	0.287657
603015	2019	1	1	3.99493	Electrical machinery and equipment manufacturing		21.2792	0.0187154	2.94444	1.02528	0.263593	2.19722	0.476307	0.5	330000	0	0	0.287657
603015	2020	1	1	4.04056	Electrical machinery and equipment manufacturing		21.438	0.0288721	2.99573	0.949753	0.318134	2.19722	0.467088	0.571429	330000	0	0	0.287657
603050	2017	4	1.417	3.72447	Electrical machinery and equipment manufacturing		21.2648	0.0414639	2.89037	0.840102	0.357839	1.94591	0.319593	0.6	130000	0	0.286208	0.356695
603050	2019	6	1.615	3.75291	Electrical machinery and equipment manufacturing		21.5963	0.0378401	2.99573	0.761759	0.42411	1.94591	0.27981	0.8	130000	0	0.239935	0.356695
603050	2020	6	1.764	3.80101	Electrical machinery and equipment manufacturing		21.8216	0.0372384	3.04452	0.835432	0.46299	1.94591	0.266444	0.8	130000	0	0.204315	0.356695
603050	2021	7	1.748	3.71068	Electrical machinery and equipment manufacturing		22.0587	0.0243805	3.09104	0.88641	0.505824	1.94591	0.255034	0.8	130000	0	0.130207	0.356695
603050	2022	9	1.823	3.6837	Electrical machinery and equipment manufacturing		22.2658	0.0252888	3.13549	0.810652	0.532819	1.94591	0.254175	0.8	130000	0	0.124442	0.356695
603050	2023	10	1.797	3.99754	Electrical machinery and equipment manufacturing		22.3876	0.0562034	3.17805	0.902999	0.527826	1.94591	0.27398	0.8	130000	0	0.136849	0.356695
603063	2020	2	1.5	3.60011	Electrical machinery and equipment manufacturing		22.1696	0.0593601	2.63906	1.1912	0.293573	2.19722	0.334661	0.375	440000	0	0.120862	0.287657
603063	2022	6	1.522	3.64973	Electrical machinery and equipment manufacturing		22.4929	0.0446098	2.77259	1.2571	0.348438	1.94591	0.284826	0.571429	440000	0	0.090202	0.356695
603063	2023	2	1.5	3.70835	Electrical machinery and equipment manufacturing		22.7039	0.0674107	2.83321	1.09	0.368335	1.94591	0.277461	0.571429	440000	0	0.0845723	0.356695
603097	2022	2	1.5	3.48748	Electrical machinery and equipment manufacturing		21.0265	0.0652117	2.77259	0.854922	0.32617	1.94591	0.545227	0.333333	320000	0	0.0827259	0.356695
603097	2023	2	1.5	3.50437	Electrical machinery and equipment manufacturing		21.2992	0.0660363	2.83321	0.878967	0.389216	1.94591	0.545227	0.333333	320000	0	0.0903957	0.356695
603109	2022	1	1	3.59971	General equipment manufacturing		21.795	0.0679293	3.4012	0.762566	0.358249	2.19722	0.523284	0.125	500000	0	0.0598265	0.287657
603109	2023	1	1	3.56421	Electrical machinery and equipment manufacturing		21.9215	0.0660038	3.43399	0.911176	0.374756	2.19722	0.512971	0.125	500000	0	0.226512	0.287657
603150	2023	2	1.5	3.47649	Electrical machinery and equipment manufacturing		22.0065	0.0368119	3.21888	0.772595	0.458808	1.94591	0.455949	0	340000	0	0.0159595	0.356695
603191	2023	1	1	3.74186	Electrical machinery and equipment manufacturing		22.3074	0.0464933	2.70805	0.843419	0.411846	2.19722	0.344391	0.375	500000	0	0.076239	0.287657
603195	2021	1	1	3.66025	Electrical machinery and equipment manufacturing		23.4624	0.165244	2.63906	1.00429	0.266134	2.19722	0.637274	0.666667	330000	0	0.0109231	0.287657
603355	2017	2	1.5	3.79239	Electrical machinery and equipment manufacturing		22.3657	0.0683435	2.83321	0.928876	0.316861	2.07944	0.614104	0.166667	320000	0	0.0380853	0.318454
603355	2019	2	1.5	3.89079	Electrical machinery and equipment manufacturing		22.4054	0.0893051	2.94444	1.15384	0.340068	2.07944	0.62676	0.2	320000	0	0.0530488	0.318454
603355	2020	4	1.594	3.88941	Electrical machinery and equipment manufacturing		22.6872	0.0447465	2.99573	1.17215	0.416195	2.07944	0.604707	0.2	320000	0	0.204561	0.318454
603355	2021	4	1.417	3.92821	Electrical machinery and equipment manufacturing		22.9107	0.0548951	3.04452	1.25226	0.492256	2.07944	0.602665	0.166667	320000	0	0.0499979	0.318454
603355	2022	5	1.509	3.87573	Electrical machinery and equipment manufacturing		23.0799	0.0891212	3.09104	1.14712	0.494356	2.07944	0.602438	0.2	320000	0	0.0744253	0.318454
603355	2023	5	1.486	4.0295	Electrical machinery and equipment manufacturing		23.254	0.0853263	3.13549	0.979649	0.501197	2.07944	0.602788	0.166667	320000	0	0.0818229	0.318454
603366	2017	1	1	3.68422	Electrical machinery and equipment manufacturing		22.5672	0.00916304	3.04452	0.766621	0.336993	2.19722	0.499749	0.25	320000	0	0.110025	0.287657
603366	2018	1	1	3.70053	Electrical machinery and equipment manufacturing		22.4825	-0.0909231	3.09104	0.709915	0.378046	2.19722	0.496454	0.25	320000	0	0.152881	0.287657
603366	2019	1	1	3.67643	Electrical machinery and equipment manufacturing		22.5612	0.0140485	3.13549	0.794074	0.394812	2.19722	0.496114	0.222222	320000	0	0.104835	0.287657
603366	2020	1	1	3.76882	Electrical machinery and equipment manufacturing		22.5491	0.0275113	3.17805	0.75165	0.372709	2.19722	0.481245	0.222222	320000	0	0.186644	0.287657
603366	2021	5	1.7	3.72837	Electrical machinery and equipment manufacturing		22.56	0.0336216	3.21888	0.730304	0.345782	2.19722	0.468831	0.222222	320000	0	0.114163	0.287657
603366	2022	4	1.75	3.7648	Electrical machinery and equipment manufacturing		22.5938	0.0389553	3.2581	0.774861	0.343354	2.19722	0.469757	0.222222	320000	0	0.169706	0.287657
603366	2023	6	1.694	3.93794	Electrical machinery and equipment manufacturing		22.6794	0.0278467	3.29584	0.762836	0.35674	2.19722	0.487345	0.222222	320000	0	0.151116	0.287657
603398	2023	1	1	3.74003	Electrical machinery and equipment manufacturing		22.2439	0.00577017	3.04452	1.15656	0.608531	1.94591	0.432609	0.142857	360000	0	0.173645	0.356695
603486	2022	1	1	3.96626	Electrical machinery and equipment manufacturing		23.3117	0.120232	3.21888	1.53052	0.416636	2.19722	0.535629	0.4	320000	0	0.173872	0.287657
603488	2022	1	1	3.6855	Electrical machinery and equipment manufacturing		20.8989	0.0342171	3.09104	1.023	0.160892	1.94591	0.411877	0.2	320000	0	0.133294	0.356695
603515	2018	4	1.75	3.80577	Electrical machinery and equipment manufacturing		22.7157	0.115706	2.3979	0.868931	0.342523	2.19722	0.630726	0.4	310000	0	0.147201	0.287657
603515	2019	3	1.667	3.86773	Electrical machinery and equipment manufacturing		22.816	0.104243	2.48491	1.38544	0.322989	2.07944	0.621084	0.4	310000	0	0.119075	0.318454
603515	2020	5	1.618	3.79589	Electrical machinery and equipment manufacturing		22.8704	0.089324	2.56495	1.39804	0.32676	2.19722	0.632673	0.25	310000	0	0.109615	0.287657
603515	2021	4	1.417	3.84607	Electrical machinery and equipment manufacturing		22.929	0.0955666	2.63906	1.12559	0.305808	1.94591	0.62117	0	310000	0	0.0783574	0.356695
603515	2022	6	1.631	3.81614	Electrical machinery and equipment manufacturing		22.8861	0.0865052	2.70805	0.970829	0.260695	1.79176	0.619193	0	310000	0	0.0939363	0.405465
603515	2023	6	1.6	3.84474	Electrical machinery and equipment manufacturing		23.0135	0.0900019	2.77259	0.968135	0.281766	1.79176	0.62724	0	310000	0	0.0963208	0.405465
603530	2019	4	1.594	3.30146	Electrical machinery and equipment manufacturing		21.0301	0.0894956	3.17805	0.923006	0.189642	1.94591	0.642437	0.166667	320000	0	0.0510575	0.356695
603530	2020	2	0.875	3.29197	Electrical machinery and equipment manufacturing		21.0453	0.0904906	3.21888	0.94945	0.173814	1.94591	0.643323	0.166667	320000	0	0.0460911	0.356695
603530	2022	1	1	3.37546	Electrical machinery and equipment manufacturing		21.4697	0.0230215	3.29584	1.46365	0.219849	1.94591	0.607319	0.166667	320000	0	0.0435356	0.356695
603579	2021	3	1.667	3.84973	Electrical machinery and equipment manufacturing		21.9105	0.0672532	2.99573	1.05366	0.376332	2.19722	0.481972	0.4	310000	0	0.0232731	0.287657
603579	2023	1	1	3.8585	Electrical machinery and equipment manufacturing		21.9426	0.0583352	3.09104	0.820809	0.348624	2.19722	0.437161	0.2	310000	0	0.0570036	0.287657
603606	2015	5	1.47	3.73175	Electrical machinery and equipment manufacturing		21.2796	0.0284764	2.89037	1.16265	0.429787	2.19722	0.483567	0.333333	330000	0	0.0446005	0.287657
603606	2018	7	1.589	3.68916	Electrical machinery and equipment manufacturing		21.9508	0.049011	3.04452	1.02589	0.400038	2.19722	0.458302	0.428571	330000	0	0.0838152	0.287657
603606	2019	6	1.44	3.74876	Electrical machinery and equipment manufacturing		22.0952	0.108565	3.09104	1.1781	0.376105	2.19722	0.424881	0.375	330000	0	0.122571	0.287657
603606	2020	2	1.5	3.83803	Electrical machinery and equipment manufacturing		22.5302	0.135986	3.13549	1.42672	0.396157	2.19722	0.424064	0.3	330000	0	0.100509	0.287657
603606	2021	1	1	3.82252	Electrical machinery and equipment manufacturing		22.8496	0.132609	3.17805	1.72522	0.348719	2.07944	0.38664	0.3	330000	0	0.0218707	0.318454
603606	2022	6	1.685	3.82842	Electrical machinery and equipment manufacturing		22.9411	0.0877233	3.21888	1.86859	0.337926	2.19722	0.410303	0.4	330000	0	0.0210956	0.287657
603606	2023	6	1.707	3.79617	Electrical machinery and equipment manufacturing		23.0879	0.0898317	3.2581	1.42839	0.34272	2.19722	0.379274	0.272727	330000	0	0.0680844	0.287657
603659	2017	3	1.389	3.41104	Electrical machinery and equipment manufacturing		22.1909	0.0990483	2.19722	1.00268	0.344695	1.60944	0.542423	0.5	310000	0	0	0.336472
603703	2020	1	1	3.43163	Electrical machinery and equipment manufacturing		21.4907	0.00985377	2.89037	1.06306	0.366131	2.19722	0.374923	0	330000	0	0.172843	0.287657
603728	2022	1	1	3.80062	Electrical machinery and equipment manufacturing		22.0754	0.0624426	3.21888	1.58971	0.260199	2.07944	0.530347	0.666667	310000	0	0.153706	0.318454
603728	2023	1	1	3.85452	Electrical machinery and equipment manufacturing		22.0691	0.0362818	3.2581	2.04864	0.228541	2.19722	0.529486	0.2	310000	0	0.181095	0.287657
603861	2017	6	1.616	3.69317	Electrical machinery and equipment manufacturing		21.9567	0.0397186	3.3673	0.881207	0.334605	2.07944	0.555245	0.666667	440000	0	0.0837309	0.405465
603861	2019	5	1.7	3.89775	Electrical machinery and equipment manufacturing		22.6408	0.0223741	3.43399	0.76724	0.46377	2.07944	0.502812	0.6	440000	0	0.0664608	0.405465
603861	2020	6	1.694	3.96758	Electrical machinery and equipment manufacturing		22.7043	0.0118291	3.46574	0.741013	0.471389	2.19722	0.501916	0.666667	440000	0	0.0631623	0.367694
603861	2021	2	0.875	3.843	Electrical machinery and equipment manufacturing		22.818	0.00542997	3.49651	0.803167	0.489532	2.07944	0.507186	0.5	440000	0	0.0837509	0.405465
603861	2022	2	0.875	3.85209	Electrical machinery and equipment manufacturing		22.8646	0.00291052	3.52636	0.707155	0.498561	2.07944	0.507196	0.5	440000	0	0.0635538	0.405465
603861	2023	5	1.6	3.87141	Electrical machinery and equipment manufacturing		22.9129	0.0120667	3.55535	0.754489	0.50236	2.19722	0.507119	0.375	440000	0	0.15052	0.367694
603897	2020	9	1.604	3.64977	Electrical machinery and equipment manufacturing		22.097	0.043161	2.63906	0.738942	0.402925	1.94591	0.536593	0	330000	0	0.1513	0.356695
603897	2021	1	1	3.60868	Electrical machinery and equipment manufacturing		22.2123	0.0741335	2.70805	1.3108	0.327931	1.94591	0.49505	0	330000	0	0.0913251	0.356695
603897	2022	4	1.417	3.62618	Electrical machinery and equipment manufacturing		22.451	0.0239092	2.77259	0.83087	0.41355	1.94591	0.478761	0	330000	0	0.125926	0.356695
605066	2020	3	1.667	3.58803	Electrical machinery and equipment manufacturing		21.8754	0.0750999	3.09104	0.786825	0.372933	2.19722	0.391701	0.285714	330000	0	0.0564962	0.287657
605066	2021	6	1.616	3.75989	Electrical machinery and equipment manufacturing		21.9065	0.0328242	3.13549	0.92178	0.386165	2.19722	0.376353	0.285714	330000	0	0.0366655	0.287657
605066	2022	3	1.389	3.72141	Electrical machinery and equipment manufacturing		21.8401	0.0144402	3.17805	0.800877	0.351028	2.19722	0.366681	0.285714	330000	0	0.132469	0.287657
605066	2023	6	1.764	3.79282	Electrical machinery and equipment manufacturing		21.9643	0.0456667	3.21888	0.932303	0.385169	2.19722	0.362655	0.125	330000	0	0.109773	0.287657
605196	2021	2	0.875	3.38638	Electrical machinery and equipment manufacturing		22.2019	0.0264945	2.99573	0.747117	0.405449	2.19722	0.3594	0	130000	0	0.0794699	0.287657
605196	2022	1	1	3.37689	Electrical machinery and equipment manufacturing		22.4178	0.0459338	3.04452	0.754794	0.435105	2.19722	0.32865	0.2	130000	0	0.216279	0.287657
605196	2023	1	1	3.43687	Electrical machinery and equipment manufacturing		22.431	0.0639046	3.09104	0.754677	0.395586	2.19722	0.316883	0.166667	130000	0	0.111246	0.287657
605222	2021	1	1	3.50143	Electrical machinery and equipment manufacturing		22.948	0.0712618	3.3322	0.78146	0.468251	2.19722	0.536218	0.125	310000	0	0.112011	0.287657
605222	2022	1	1	3.51615	Electrical machinery and equipment manufacturing		23.2261	0.0298494	3.3673	0.765881	0.504964	2.19722	0.531756	0.125	310000	0	0.0898404	0.287657
605222	2023	1	1	3.67454	Electrical machinery and equipment manufacturing		23.3295	0.030818	3.4012	0.812707	0.508117	2.19722	0.529551	0.125	310000	0	0.269975	0.287657
605365	2023	1	1	3.80624	Electrical machinery and equipment manufacturing		22.5169	0.0508547	2.19722	0.74869	0.346465	2.19722	0.601133	0.166667	350000	0	0.14224	0.287657
605378	2022	1	1	3.64444	Electrical machinery and equipment manufacturing		21.1207	0.0642043	3.29584	0.8228	0.182583	2.19722	0.493151	0.166667	330000	0	0.218083	0.287657
688223	2022	8	1.804	3.25762	Electrical machinery and equipment manufacturing		25.3833	0.0274153	2.83321	0.769543	0.558099	1.94591	0.527768	0.375	360000	0	0.0982465	0.356695
688223	2023	9	1.792	3.35173	Electrical machinery and equipment manufacturing		25.607	0.0547888	2.89037	0.754253	0.553842	1.94591	0.521637	0.428571	360000	0	0.153074	0.356695
688330	2020	2	0.875	3.79696	Electrical machinery and equipment manufacturing		21.946	0.0895529	2.30259	0.852811	0.103751	1.94591	0.403303	0.5	310000	0	0.189911	0.356695
688330	2021	2	0.875	3.6796	Electrical machinery and equipment manufacturing		22.0882	0.100252	2.3979	1.07322	0.137569	1.94591	0.403303	0.5	310000	0	0.0759832	0.356695
688330	2022	2	0.875	3.69037	Electrical machinery and equipment manufacturing		22.1465	0.0739224	2.48491	0.871614	0.138817	1.94591	0.403303	0.5	310000	0	0.0623449	0.356695
688345	2021	2	1.5	3.57948	Electrical machinery and equipment manufacturing		21.5206	0.0550753	2.48491	0.9006	0.395204	1.60944	0.557471	0.75	440000	0	0.0772841	0.336472
688345	2022	2	0.875	3.49241	Electrical machinery and equipment manufacturing		21.6753	0.0420043	2.56495	0.865006	0.42482	1.60944	0.557471	0.6	440000	0	0.138412	0.336472
688345	2023	1	1	3.58522	Electrical machinery and equipment manufacturing		21.6982	-0.0128239	2.63906	0.784053	0.446854	1.60944	0.557471	0.666667	440000	0	0.126623	0.336472
688390	2020	1	1	3.61007	Electrical machinery and equipment manufacturing		21.6631	0.0963194	2.3979	1.31718	0.358318	2.07944	0.435151	0.5	320000	0	0.18761	0.318454
688390	2021	2	1.5	3.55172	Electrical machinery and equipment manufacturing		22.0356	0.0722879	2.48491	2.16491	0.437183	2.07944	0.398945	0.4	320000	0	0.111882	0.318454
688390	2022	2	1.5	3.5809	Electrical machinery and equipment manufacturing		22.4809	0.10411	2.56495	1.83109	0.474132	1.94591	0.381158	0.4	320000	0	0.147597	0.356695
688390	2023	2	1.5	3.68514	Electrical machinery and equipment manufacturing		22.6849	0.114944	2.63906	1.55695	0.45087	1.94591	0.38105	0.555556	320000	0	0.125246	0.356695
688408	2021	1	1	3.31094	Electrical machinery and equipment manufacturing		22.3648	0.00302028	2.56495	1.43527	0.423238	1.94591	0.411537	0.25	320000	0	0.102377	0.356695
688408	2022	3	1.667	3.57831	Electrical machinery and equipment manufacturing		22.4447	0.00812635	2.63906	1.1134	0.440243	1.94591	0.413474	0.5	320000	0	0.0533574	0.356695
688408	2023	5	1.748	3.56934	Electrical machinery and equipment manufacturing		22.8232	0.0414367	2.70805	1.04666	0.503985	1.94591	0.417401	0.461538	320000	0	0.203823	0.356695
688472	2023	15	1.821	3.53197	Electrical machinery and equipment manufacturing		24.9095	0.0429559	2.70805	0.716084	0.51488	2.19722	0.56206	0.75	320000	0	0.169378	0.287657
688517	2021	3	1.074	3.47552	Electrical machinery and equipment manufacturing		20.7783	0.0633926	2.83321	0.814102	0.281862	2.19722	0.484646	0.5	410000	0	0.0646429	0.287657
688517	2022	1	1	3.54419	Electrical machinery and equipment manufacturing		20.9134	0.0631546	2.89037	0.883042	0.329519	2.19722	0.480281	0.571429	410000	0	0.0515631	0.287657
688517	2023	2	0.875	3.65206	Electrical machinery and equipment manufacturing		20.9674	0.0613917	2.94444	0.980181	0.316712	2.19722	0.443593	0.75	410000	0	0.0422253	0.287657
688567	2020	2	1.5	3.53173	Electrical machinery and equipment manufacturing		23.4588	-0.021703	2.48491	0.851734	0.297453	2.3979	0.429309	0.7	360000	0	0.120936	0.310128
688567	2021	1	1	3.27167	Electrical machinery and equipment manufacturing		23.7648	-0.0465747	2.56495	1.08297	0.442784	2.3979	0.40488	0.571429	360000	0	0.044211	0.310128
688567	2022	1	1	3.47562	Electrical machinery and equipment manufacturing		24.193	-0.0292782	2.63906	0.889465	0.486104	2.30259	0.369687	0.727273	360000	0	0.0503378	0.336472
688567	2023	4	1.75	3.47466	Electrical machinery and equipment manufacturing		24.1293	-0.0639621	2.70805	0.839263	0.504108	2.3979	0.369537	0.692308	360000	0	0.0609511	0.310128
688599	2020	2	1.5	3.6094	Electrical machinery and equipment manufacturing		24.543	0.0266877	3.17805	0.743211	0.50418	2.07944	0.44962	0.692308	320000	0	0.258403	0.318454
688599	2021	2	1.5	3.69658	Electrical machinery and equipment manufacturing		24.8749	0.0286995	3.21888	1.20576	0.538911	1.94591	0.447938	0.692308	320000	0	0.195361	0.356695
688599	2022	9	1.858	3.71405	Electrical machinery and equipment manufacturing		25.2228	0.0397926	3.2581	1.00907	0.518773	2.07944	0.410046	0.769231	320000	0	0.124193	0.318454
688599	2023	14	1.916	3.77272	Electrical machinery and equipment manufacturing		25.5134	0.0486484	3.29584	0.793751	0.528422	1.94591	0.410536	0.727273	320000	0	0.20498	0.356695
688611	2021	3	1.074	3.84133	Electrical machinery and equipment manufacturing		20.634	0.104394	2.99573	1.03312	0.0810106	1.94591	0.477584	0.545455	330000	0	0.130066	0.356695
688611	2022	1	1	3.85489	Electrical machinery and equipment manufacturing		20.5928	0.062902	3.04452	0.890092	0.0690454	1.94591	0.477584	0.545455	330000	0	0.135074	0.356695
688611	2023	4	1.594	3.98705	Electrical machinery and equipment manufacturing		20.661	0.0490782	3.09104	0.89942	0.0975311	1.94591	0.477584	0.545455	330000	0	0.108394	0.356695
688663	2021	1	1	3.63753	Electrical machinery and equipment manufacturing		21.314	0.0623164	2.89037	0.989709	0.343802	2.19722	0.477375	0.75	370000	1	0.165324	0.287657
688663	2023	1	1	3.70498	Electrical machinery and equipment manufacturing		21.7367	0.0585765	2.99573	0.952014	0.426942	2.19722	0.422225	0.666667	370000	1	0.132305	0.287657
688676	2022	1	1	3.8817	Electrical machinery and equipment manufacturing		22.7338	0.0372348	3.2581	1.00908	0.47939	1.79176	0.534067	0.705882	460000	0	0.0184337	0.287657
688676	2023	3	1.389	3.98039	Electrical machinery and equipment manufacturing		22.8667	0.0571942	3.29584	0.968108	0.478389	1.79176	0.489084	0.722222	460000	0	0.16535	0.287657
688772	2021	1	1	3.71294	Electrical machinery and equipment manufacturing		23.5167	0.0562437	2.70805	0.821168	0.479053	2.19722	0.332997	0.714286	440000	0	0.0854856	0.287657
688772	2022	2	1.5	3.78167	Electrical machinery and equipment manufacturing		23.7093	0.00293354	2.77259	0.910286	0.508852	2.19722	0.331462	0.714286	440000	0	0.115837	0.287657
688772	2023	1	1	3.78078	Electrical machinery and equipment manufacturing		23.7917	0.00911618	2.83321	0.937399	0.509058	2.19722	0.33041	0.625	440000	0	0.147062	0.287657
688778	2023	2	1.5	3.43325	Computer, communication, and other electronic equipment manufacturing		23.3246	0.0385251	2.19722	0.78272	0.295883	2.19722	0.522989	0.6	350000	1	0.201205	0.287657
688779	2021	2	0.875	3.41935	Electrical machinery and equipment manufacturing		22.9638	0.0719016	2.99573	1.00861	0.266897	2.19722	0.437379	0.8	430000	1	0.0615705	0.287657
688779	2022	2	0.875	3.4442	Electrical machinery and equipment manufacturing		23.5944	0.0809866	3.04452	0.953926	0.431821	2.19722	0.428949	0.8	430000	1	0.120596	0.287657
688779	2023	1	1	3.45242	Computer, communication, and other electronic equipment manufacturing		23.3734	-0.0088311	3.09104	0.81066	0.382994	2.19722	0.428231	0.714286	430000	1	0.0734113	0.287657
831641	2022	1	1	3.72494	Electrical machinery and equipment manufacturing		20.4028	0.093016	2.83321	0.776847	0.383888	2.19722	0.50127	0.444444	320000	0	0.120664	0.287657
831641	2023	1	1	3.59937	Computer, communication, and other electronic equipment manufacturing		20.2505	0.0384355	2.89037	0.858959	0.324578	2.19722	0.470132	0.125	320000	0	0.0563529	0.287657
831768	2023	2	0.875	3.42321	Electrical machinery and equipment manufacturing		20.9249	-0.0328655	3.3673	0.707847	0.380647	2.19722	0.437999	0	440000	0	0.0674175	0.287657
835368	2022	1	1	3.38589	Electrical machinery and equipment manufacturing		22.8948	0.0473161	2.77259	0.919926	0.470982	1.79176	0.428937	0.333333	210000	0	0.203912	0.287657
837046	2022	2	0.875	3.33151	Electrical machinery and equipment manufacturing		19.807	0.0446571	2.70805	0.737312	0.326425	1.94591	0.506608	0	320000	0	0.180278	0.251303
837046	2023	2	0.875	3.3761	Electrical machinery and equipment manufacturing		19.8224	0.0432448	2.77259	0.904402	0.345474	1.60944	0.505865	0	320000	0	0.0365538	0.336472
000521	2021	2	1.5	4.11487	Electrical machinery and equipment manufacturing		23.4439	0.005717	3.4012	0.644968	0.513535	2.19722	0.288423	0.125	340000	1	0.14761	0.287657
000521	2023	3	1.667	3.95035	Electrical machinery and equipment manufacturing		23.6881	0.0390987	3.46574	0.670469	0.51914	2.19722	0.300417	0.142857	340000	1	0.148185	0.287657
600973	2013	2	1.5	3.68873	Electrical machinery and equipment manufacturing		22.6381	0.0146687	2.63906	0.76183	0.528544	2.07944	0.37599	0.125	320000	1	0.0546883	0.318454
600973	2014	2	1.5	3.8369	Electrical machinery and equipment manufacturing		22.8716	0.0149818	2.70805	0.818516	0.559994	2.07944	0.361939	0.125	320000	1	0.0255965	0.318454
600973	2015	4	1.417	3.80013	Electrical machinery and equipment manufacturing		22.9036	0.0186497	2.77259	0.90189	0.553804	2.07944	0.338867	0.111111	320000	1	0.157	0.318454
600973	2016	3	1.074	3.76402	Electrical machinery and equipment manufacturing		23.1335	0.0240118	2.83321	0.780922	0.497355	2.07944	0.407616	0.222222	320000	1	0.222049	0.318454
600973	2017	4	1.296	3.72972	Electrical machinery and equipment manufacturing		23.4122	0.00582526	2.89037	0.736929	0.531801	2.07944	0.413407	0.111111	320000	1	0.519675	0.318454
600973	2019	4	1.594	3.74502	Electrical machinery and equipment manufacturing		23.5553	0.0111318	2.99573	0.685678	0.537437	1.94591	0.395863	0.111111	320000	1	0.169274	0.356695
600973	2020	4	1.594	3.89069	Electrical machinery and equipment manufacturing		23.7128	0.0127686	3.04452	0.70498	0.54615	2.07944	0.400309	0.0909091	320000	1	0.210936	0.318454
600973	2022	5	1.352	3.94234	Electrical machinery and equipment manufacturing		23.7769	0.00303328	3.13549	0.728878	0.571562	2.3979	0.388145	0.111111	320000	1	0.130126	0.310128
600973	2023	6	1.44	3.84487	Electrical machinery and equipment manufacturing		23.8321	0.00203328	3.17805	0.72578	0.57544	2.3979	0.385998	0.111111	320000	1	0.236911	0.310128
002276	2016	2	0.875	3.96057	Electrical machinery and equipment manufacturing		22.3391	0.0406765	3.04452	1.43161	0.327211	2.19722	0.356785	0.2	330000	0	0.0849407	0.287657
002276	2017	3	1.074	3.93013	Electrical machinery and equipment manufacturing		22.6753	0.0153879	3.09104	0.968725	0.360434	2.19722	0.341751	0.142857	330000	0	0.103871	0.287657
002276	2018	1	1	3.92916	Electrical machinery and equipment manufacturing		22.7171	0.0155647	3.13549	0.770663	0.372098	2.19722	0.327364	0	330000	0	0.0637768	0.287657
002276	2021	1	1	3.96804	Electrical machinery and equipment manufacturing		23.1587	0.0236831	3.2581	0.88295	0.470755	2.19722	0.331289	0.142857	330000	1	0.173444	0.287657
300265	2011	1	1	3.67609	Electrical machinery and equipment manufacturing		20.7958	0.0378551	2.30259	0.777287	0.287946	1.94591	0.565945	0.2	320000	0	0.183402	0.356695
300265	2017	2	0.875	4.04447	Electrical machinery and equipment manufacturing		21.4704	0.0212962	2.77259	1.08596	0.426452	1.94591	0.527129	0	320000	0	0.268626	0.356695
300265	2018	1	1	3.94143	Electrical machinery and equipment manufacturing		21.5497	0.0179459	2.83321	1.00626	0.437968	1.94591	0.526939	0	320000	0	0.26972	0.356695
300265	2022	1	1	3.82459	Electrical machinery and equipment manufacturing		21.7623	0.0303532	3.04452	0.928754	0.401262	1.94591	0.45572	0.333333	320000	0	0.298343	0.356695
300265	2023	1	1	3.90588	Electrical machinery and equipment manufacturing		21.9127	0.0324383	3.09104	0.903631	0.260172	1.94591	0.395151	0.333333	320000	0	0.205805	0.356695
600379	2011	2	0.875	3.36931	Electrical machinery and equipment manufacturing		20.2091	0.00785218	2.70805	1.57841	0.329857	1.94591	0.379889	0	610000	1	0.100994	0.356695
600379	2017	1	1	3.72109	Electrical machinery and equipment manufacturing		20.3776	0.0496715	3.04452	1.61243	0.261642	1.94591	0.41648	0.166667	610000	1	0.224502	0.356695
600379	2020	1	1	3.75023	Electrical machinery and equipment manufacturing		20.586	0.0516048	3.17805	1.29918	0.298749	1.94591	0.409403	0	610000	1	0.100872	0.356695
600379	2021	2	0.875	3.9163	Electrical machinery and equipment manufacturing		20.8343	0.0456259	3.21888	1.82777	0.357484	1.94591	0.406497	0	610000	1	0.0203259	0.356695
600379	2022	12	1.742	3.8368	Electrical machinery and equipment manufacturing		21.1301	0.0389939	3.2581	1.43566	0.437564	1.79176	0.390035	0	610000	1	0	0.405465
600379	2023	4	1.26	3.77091	Electrical machinery and equipment manufacturing		21.1479	0.0462877	3.29584	1.30555	0.418352	1.94591	0.377068	0.142857	610000	1	0	0.356695
300048	2022	2	1.5	3.84422	Electrical machinery and equipment manufacturing		21.745	0.0117933	2.99573	1.1791	0.273306	1.94591	0.229418	0.4	110000	0	0.118464	0.356695
300048	2023	3	1.389	3.7506	Electrical machinery and equipment manufacturing		21.8757	-0.0726241	3.04452	1.17382	0.375606	1.94591	0.229592	0	110000	0	0.116153	0.356695
002560	2022	3	1.667	3.86608	Electrical machinery and equipment manufacturing		22.378	0.018634	3.04452	0.776848	0.416051	1.94591	0.293715	0.4	410000	0	0.29934	0.356695
600202	2012	3	1.389	3.44027	Electrical machinery and equipment manufacturing		21.7831	0.00726423	2.99573	0.855233	0.517884	2.19722	0.308938	0.5	230000	1	0.075054	0.287657
600202	2013	1	1	3.42258	Electrical machinery and equipment manufacturing		21.7252	-0.0328434	3.04452	0.883861	0.527068	2.07944	0.30806	0.571429	230000	1	0.0796599	0.318454
600202	2015	2	0.875	3.60682	Electrical machinery and equipment manufacturing		21.6407	0.00555757	3.13549	1.30208	0.503935	2.19722	0.328626	0.4	230000	1	0.147325	0.287657
600202	2019	1	1	3.38876	Electrical machinery and equipment manufacturing		21.423	0.0248066	3.29584	0.954234	0.511295	2.19722	0.327426	0.666667	230000	1	0.0943503	0.287657
000418	2012	1	1	3.44094	Electrical machinery and equipment manufacturing		22.8519	0.0440931	2.99573	0.728232	0.401595	2.19722	0.439831	0.285714	320000	0	0.0333142	0.287657
000418	2015	1	1	3.88089	Electrical machinery and equipment manufacturing		23.3855	0.0709271	3.13549	0.926022	0.458744	2.19722	0.474344	0	320000	0	0	0.287657
000418	2016	1	1	3.86375	Electrical machinery and equipment manufacturing		23.6617	0.0686853	3.17805	0.957509	0.489513	2.07944	0.483744	0	320000	0	0.215701	0.318454
000418	2018	1	1	3.94713	Electrical machinery and equipment manufacturing		23.8829	0.0865835	3.2581	0.982537	0.461377	2.19722	0.504508	0	320000	0	0.411442	0.287657
600577	2021	1	1	3.8156	Electrical machinery and equipment manufacturing		23.0388	0.061645	3.09104	1.09814	0.427147	2.07944	0.308563	0.285714	340000	0	0.037156	0.318454
600577	2022	1	1	3.78879	Electrical machinery and equipment manufacturing		23.108	0.0373764	3.13549	0.834983	0.409085	1.94591	0.269703	0.285714	340000	0	0.0556394	0.356695
002123	2011	9	1.889	3.46143	Electrical machinery and equipment manufacturing		21.9618	0.0861285	2.63906	1.2764	0.327481	2.19722	0.353085	0.166667	210000	0	0.0815447	0.287657
002123	2012	11	1.782	3.36677	Electrical machinery and equipment manufacturing		22.1617	0.0253699	2.70805	0.888062	0.367349	2.07944	0.321318	0.2	210000	0	0.0510967	0.318454
002123	2013	9	1.702	3.38425	Electrical machinery and equipment manufacturing		22.2082	0.0149008	2.77259	0.822298	0.3922	1.94591	0.282702	0.2	210000	0	0	0.356695
002123	2014	12	1.824	3.65911	Electrical machinery and equipment manufacturing		21.9805	-0.0807902	2.83321	1.00184	0.392613	1.94591	0.269333	0.25	210000	0	0.0621898	0.356695
002123	2015	14	1.788	3.88294	Electrical machinery and equipment manufacturing		22.7166	0.014392	2.89037	1.17564	0.291473	2.19722	0.331536	0.25	210000	0	0	0.287657
002471	2017	1	1	3.75643	Electrical machinery and equipment manufacturing		22.9384	0.0123596	3.09104	0.809196	0.52318	1.79176	0.328598	0.25	320000	0	0.192779	0.405465
002471	2018	1	1	3.86758	Electrical machinery and equipment manufacturing		22.8229	0.0127317	3.13549	0.749572	0.53068	1.94591	0.327295	0.25	320000	0	0	0.356695
002471	2020	1	1	3.7539	Electrical machinery and equipment manufacturing		22.4266	0.00136637	3.21888	0.859564	0.548327	2.19722	0.271649	0.25	320000	0	0.0238703	0.287657
002471	2022	4	1.234	3.71204	Electrical machinery and equipment manufacturing		22.4572	-0.00869245	3.29584	0.848483	0.560854	2.19722	0.188809	0.142857	320000	0	0.0494857	0.287657
002471	2023	1	1	3.83262	Electrical machinery and equipment manufacturing		22.4602	0.0428458	3.3322	0.863503	0.532215	2.19722	0.176747	0.142857	320000	0	0.0255616	0.287657
300317	2012	1	1	3.3831	Electrical machinery and equipment manufacturing		20.7452	0.00568824	2.99573	0.747277	0.366301	2.19722	0.492305	0.2	440000	0	0	0.287657
300317	2016	2	1.5	3.68946	Electrical machinery and equipment manufacturing		22.9325	0.0367462	3.17805	0.860057	0.402854	1.79176	0.489037	0.166667	440000	0	0.239544	0.287657
300317	2017	1	1	3.75925	Electrical machinery and equipment manufacturing		22.9232	0.0314877	3.21888	0.856012	0.371975	1.79176	0.487313	0.166667	440000	0	0.209004	0.287657
300317	2018	1	1	3.78674	Electrical machinery and equipment manufacturing		22.6503	-0.343027	3.2581	0.745015	0.445763	1.79176	0.486259	0.166667	440000	0	0.176633	0.287657
300317	2019	1	1	3.75815	Electrical machinery and equipment manufacturing		22.1853	-0.289297	3.29584	0.867418	0.441384	1.79176	0.485988	0.2	440000	0	0.159255	0.287657
002452	2016	4	1.234	3.75513	Electrical machinery and equipment manufacturing		21.7696	0.0417373	2.94444	1.03744	0.42788	2.19722	0.292137	0	430000	0	0.362253	0.287657
002452	2017	1	1	3.85426	Electrical machinery and equipment manufacturing		21.7838	0.0214185	2.99573	0.894831	0.41706	2.19722	0.294012	0	430000	0	0.333752	0.287657
002452	2018	3	1.667	3.82002	Electrical machinery and equipment manufacturing		21.6141	-0.106136	3.04452	0.793494	0.427038	2.19722	0.304144	0	430000	0	0.312845	0.287657
002452	2022	9	1.64	3.82047	Electrical machinery and equipment manufacturing		21.9035	0.0148322	3.21888	0.892724	0.302892	2.19722	0.241556	0	430000	0	0.197742	0.287657
002452	2023	3	1.667	3.84149	Electrical machinery and equipment manufacturing		21.8992	0.0513717	3.2581	0.936037	0.2641	2.19722	0.237187	0	430000	0	0.173343	0.287657
601311	2015	1	1	3.74653	Electrical machinery and equipment manufacturing		22.6033	0.0898233	3.09104	1.41536	0.254125	2.19722	0.434318	0.142857	420000	0	0	0.287657
601311	2021	3	1.667	3.60412	Electrical machinery and equipment manufacturing		23.2834	0.0634419	3.3322	0.99747	0.278606	2.19722	0.367922	0.25	420000	0	0.127493	0.287657
601311	2022	4	1.75	3.63278	Electrical machinery and equipment manufacturing		23.3261	0.0332104	3.3673	0.709589	0.280894	2.07944	0.346073	0.222222	420000	0	0.132542	0.318454
601311	2023	2	1.5	3.66913	Electrical machinery and equipment manufacturing		23.3635	0.0400403	3.4012	0.692395	0.28371	2.19722	0.329376	0.142857	420000	0	0.184523	0.287657
002733	2016	1	1	3.77962	Electrical machinery and equipment manufacturing		21.8869	0.0371061	3.13549	0.919714	0.263851	2.19722	0.464409	0.5	440000	0	0.14088	0.287657
002270	2022	7	1.549	3.79881	Electrical machinery and equipment manufacturing		22.2162	0.0785911	3.04452	0.985115	0.222954	2.19722	0.415201	0.25	370000	0	0.0336543	0.287657
002270	2023	7	1.557	3.84373	Electrical machinery and equipment manufacturing		22.2314	0.115003	3.09104	1.31968	0.227719	2.19722	0.432343	0.25	370000	0	0.0825551	0.287657
300617	2019	1	1	3.8009	Electrical machinery and equipment manufacturing		20.7726	0.0595397	2.77259	0.948392	0.191742	2.07944	0.513103	0.166667	320000	0	0.0715997	0.318454
300617	2020	1	1	3.86994	Electrical machinery and equipment manufacturing		20.89	0.107882	2.83321	1.46541	0.193389	1.94591	0.51613	0.2	320000	0	0.108499	0.356695
300617	2021	1	1	3.70538	Electrical machinery and equipment manufacturing		21.8609	0.0634912	2.89037	1.15695	0.157963	1.94591	0.444315	0.2	320000	0	0.0726272	0.356695
300617	2022	2	1.5	3.72577	Electrical machinery and equipment manufacturing		21.9567	0.0445646	2.94444	0.959904	0.231692	1.94591	0.43245	0.2	320000	0	0.0719439	0.356695
300617	2023	1	1	3.73549	Electrical machinery and equipment manufacturing		21.9627	0.056034	2.99573	0.867455	0.187115	1.94591	0.430756	0	320000	0	0.0611598	0.356695
002879	2017	2	0.875	3.35788	Electrical machinery and equipment manufacturing		21.2465	0.0692223	3.04452	1.08756	0.159155	2.07944	0.359546	0.5	430000	0	0.20564	0.318454
002879	2020	3	1.074	3.67785	Electrical machinery and equipment manufacturing		21.3986	0.0790398	3.17805	0.900503	0.197386	2.19722	0.382477	0.666667	430000	0	0.0890902	0.287657
002879	2021	5	1.7	3.61327	Electrical machinery and equipment manufacturing		21.4778	0.0639252	3.21888	1.08446	0.207926	2.19722	0.361761	0.6	430000	0	0.0237965	0.287657
002879	2022	1	1	3.45559	Electrical machinery and equipment manufacturing		21.5207	0.0133153	3.2581	0.835482	0.215658	2.19722	0.377292	0.6	430000	0	0	0.287657
002879	2023	3	1.16	3.47236	Electrical machinery and equipment manufacturing		21.5647	0.0306221	3.29584	0.872821	0.213012	2.19722	0.384106	0.5	430000	0	0.0348164	0.287657
300510	2017	2	0.875	3.78837	Electrical machinery and equipment manufacturing		21.8266	0.041837	2.48491	0.892943	0.203292	1.94591	0.480075	0	220000	0	0.165575	0.356695
300510	2016	2	0.875	3.39807	Electrical machinery and equipment manufacturing		20.5092	0.0724316	2.3979	1.30393	0.216172	1.94591	0.503431	0	220000	0	0.143033	0.356695
300833	2020	1	1	3.47192	Electrical machinery and equipment manufacturing		21.3342	0.0472428	2.77259	0.825406	0.0522359	1.94591	0.559614	0.5	440000	0	0.0207047	0.356695
300340	2014	1	1	3.31828	Computer, communication, and other electronic equipment manufacturing		20.7316	-0.0498985	2.70805	0.981314	0.127223	2.19722	0.309119	0.2	440000	0	0	0.287657
300919	2021	3	1.389	3.42933	Electrical machinery and equipment manufacturing		24.0626	0.0327283	2.19722	1.00167	0.484467	1.94591	0.520446	0	520000	0	0	0.356695
300919	2022	5	1.7	3.52598	Electrical machinery and equipment manufacturing		24.7099	0.0280819	2.19722	0.752932	0.483905	1.94591	0.472563	0	520000	0	0.124265	0.356695
601012	2021	1	1	3.6992	Electrical machinery and equipment manufacturing		25.3055	0.0887808	3.09104	1.8385	0.414162	2.19722	0.340863	0.333333	610000	0	0.0142635	0.287657
601012	2022	1	1	3.73946	Electrical machinery and equipment manufacturing		25.6617	0.100555	3.13549	1.34778	0.440775	2.19722	0.346954	0.333333	610000	0	0.0997409	0.287657
601012	2023	4	1.75	3.72583	Electrical machinery and equipment manufacturing		25.8229	0.0631389	3.17805	0.965881	0.450278	2.19722	0.290385	0	610000	0	0.144418	0.287657
301278	2022	1	1	3.47036	Electrical machinery and equipment manufacturing		21.1215	0.0765047	2.89037	1.10356	0.281854	1.60944	0.566253	0.333333	320000	0	0.0546435	0.405465
000586	2023	1	1	3.79864	Electrical machinery and equipment manufacturing		20.1757	0.0350778	3.58352	1.72598	0.34385	1.60944	0.354665	0.2	510000	0	0.0181757	0.336472
600416	2019	3	1.074	3.59275	General equipment manufacturing		23.5585	-0.0974544	3.04452	0.792232	0.594368	2.30259	0.371733	0	430000	1	0.155731	0.336472
600416	2021	1	1	3.65854	General equipment manufacturing		23.2682	0.00915746	3.13549	1.05949	0.49575	2.19722	0.410557	0.285714	430000	1	0.0744154	0.287657
600416	2022	7	1.6	3.70236	General equipment manufacturing		23.3656	0.0198708	3.17805	1.06975	0.410591	2.19722	0.360991	0.333333	430000	1	0.0159315	0.287657
600416	2023	4	1.437	3.68208	Electrical machinery and equipment manufacturing		23.393	0.0205581	3.21888	1.03156	0.404331	2.07944	0.356749	0.4	430000	1	0.030748	0.318454
600416	2011	1	1	3.51204	General equipment manufacturing		23.3319	0.0103728	2.56495	0.755254	0.598782	2.3979	0.342179	0.111111	430000	1	0.0696175	0.310128
000625	2011	12	1.817	3.39206	Railway, ship, aerospace and other transportation equipment manufacturing		24.3215	0.0250223	2.77259	0.716243	0.469391	2.70805	0.395636	0.428571	500000	1	0.246133	0.287657
000625	2012	5	1.618	3.42315	Automobile manufacturing		24.5545	0.0302213	2.83321	0.811128	0.510586	2.70805	0.41023	0.428571	500000	1	0.147108	0.287657
000625	2013	3	1.16	3.61604	Automobile manufacturing		24.7004	0.0629711	2.89037	0.958969	0.501203	2.70805	0.376578	0.384615	500000	1	0.0493928	0.287657
000625	2014	5	1.587	3.75134	Automobile manufacturing		24.9673	0.10245	2.94444	0.971513	0.491471	2.56495	0.35985	0.583333	500000	1	0.131538	0.325411
000625	2015	4	1.75	3.83112	Automobile manufacturing		25.2165	0.105236	2.99573	0.890297	0.48107	2.56495	0.37302	0.538462	500000	1	0.111536	0.325411
000625	2016	5	1.8	3.95304	Automobile manufacturing		25.3915	0.092109	3.04452	0.795865	0.465599	2.56495	0.38908	0.5	500000	1	0.0974005	0.379463
000625	2017	4	1.465	4.04417	Automobile manufacturing		25.3879	0.0657165	3.09104	0.72919	0.440035	2.56495	0.406524	0.571429	500000	1	0.154549	0.430808
000625	2018	7	1.764	4.06669	Automobile manufacturing		25.2611	0.00770761	3.13549	0.596861	0.409674	2.63906	0.406271	0.533333	500000	1	0	0.451967
000625	2019	8	1.765	3.93649	Automobile manufacturing		25.3043	-0.027513	3.17805	0.687946	0.438213	2.63906	0.414876	0.571429	500000	1	0.0657699	0.451967
000625	2020	10	1.778	4.0609	Automobile manufacturing		25.5184	0.0268332	3.21888	0.858557	0.443214	2.56495	0.399194	0.6	500000	1	0	0.451967
000625	2021	9	1.823	4.16276	Automobile manufacturing		25.6315	0.02627	3.2581	0.835069	0.462105	2.56495	0.379506	0.466667	500000	1	0.225115	0.427422
000625	2022	14	1.844	4.16949	Automobile manufacturing		25.7072	0.0516699	3.29584	0.822528	0.45043	2.56495	0.367533	0.357143	500000	1	0.215111	0.427422
000625	2023	13	1.839	4.01779	Automobile manufacturing		25.9712	0.0487568	3.3322	0.862235	0.474546	2.48491	0.364177	0.235294	500000	1	0.14889	0.405465
000768	2014	1	1	3.34851	Railway, ship, aerospace and other transportation equipment manufacturing		24.251	0.0109727	2.89037	1.08758	0.482792	2.63906	0.466304	0.222222	610000	1	0.102584	0.30535
000768	2015	2	1.5	3.44921	Railway, ship, aerospace and other transportation equipment manufacturing		24.3466	0.0122217	2.94444	1.20031	0.436824	2.56495	0.460669	0	610000	1	0.170772	0.325411
000768	2017	1	1	3.40895	Railway, ship, aerospace and other transportation equipment manufacturing		24.4304	0.0115768	3.04452	0.998662	0.449029	2.63906	0.460733	0.545455	610000	1	0.171752	0.30535
000768	2018	1	1	3.41376	Railway, ship, aerospace and other transportation equipment manufacturing		24.5923	0.0105484	3.09104	0.859551	0.467991	2.63906	0.463038	0.5	610000	1	0.0280366	0.30535
000768	2023	1	1	3.6539	Railway, ship, aerospace and other transportation equipment manufacturing		25.1167	0.0105835	3.29584	0.926233	0.564444	2.3979	0.463073	0.666667	610000	1	0.0250326	0.310128
000913	2014	1	1	3.72671	Railway, ship, aerospace and other transportation equipment manufacturing		22.0137	-0.0627719	2.77259	0.780206	0.352915	2.56495	0.456687	0.2	330000	1	0.0463905	0.325411
000913	2015	1	1	3.85242	Railway, ship, aerospace and other transportation equipment manufacturing		21.9553	-0.0461736	2.83321	1.07549	0.341892	2.56495	0.415087	0.2	330000	1	0	0.325411
000920	2012	2	1.5	3.38546	Railway, ship, aerospace and other transportation equipment manufacturing		21.414	0.0549221	2.63906	1.04106	0.338144	1.60944	0.385823	0.285714	520000	1	0.0394373	0.336472
000925	2015	1	1	3.64716	Special equipment manufacturing		22.1839	0.00399424	2.83321	1.02992	0.539886	2.3979	0.343273	0.25	330000	1	0.0270141	0.310128
000925	2016	1	1	3.80665	Special equipment manufacturing		22.1125	-0.0336841	2.89037	1.28127	0.540646	2.3979	0.343139	0.25	330000	1	0	0.310128
000925	2017	5	1.618	4.20071	Special equipment manufacturing		22.5176	0.0201371	2.94444	0.906573	0.470664	2.3979	0.232124	0.3	330000	1	0.135709	0.310128
000925	2018	3	1.389	4.17596	Special equipment manufacturing		22.5898	0.00407893	2.99573	0.742046	0.484199	2.3979	0.223746	0.444444	330000	1	0.0150741	0.310128
000925	2019	1	1	4.13249	Special equipment manufacturing		22.7148	0.0135389	3.04452	0.757797	0.506461	2.3979	0.218012	0.5	330000	0	0	0.310128
000925	2020	1	1	4.18008	Special equipment manufacturing		22.5391	0.000797345	3.09104	0.764493	0.463012	2.48491	0.20465	0.444444	330000	0	0.0574788	0.405465
000925	2021	1	1	4.08429	Special equipment manufacturing		22.7069	0.0269627	3.13549	0.835202	0.479978	2.30259	0.193672	0.4	330000	0	0	0.405465
000925	2022	2	1.5	3.98933	Special equipment manufacturing		22.712	0.0105928	3.17805	0.743685	0.460215	2.30259	0.152	0.25	330000	0	0.0386484	0.405465
000925	2023	2	1.5	3.96768	Railway, ship, aerospace and other transportation equipment manufacturing		22.74	0.00863358	3.21888	0.800411	0.462759	2.30259	0.145614	0.3	330000	0	0.0506149	0.405465
002283	2016	1	1	3.41443	Automobile manufacturing		22.3571	0.0383784	2.30259	1.09669	0.256522	2.19722	0.371999	0.142857	370000	0	0.036661	0.287657
002283	2019	1	1	3.73245	Automobile manufacturing		22.6428	0.0505904	2.56495	0.666402	0.284877	2.19722	0.292545	0.222222	370000	0	0.0898539	0.287657
002283	2020	2	1.5	3.84895	Automobile manufacturing		22.8192	0.0604954	2.63906	0.74839	0.321692	2.19722	0.291974	0.285714	370000	0	0.131365	0.287657
002367	2022	3	1.667	4.04111	General equipment manufacturing		22.6315	0.039875	3.2581	0.819236	0.419225	2.19722	0.42523	0	320000	0	0.196567	0.287657
002389	2021	2	1.5	3.77283	Computer, communication, and other electronic equipment manufacturing		22.9758	0.0250409	2.77259	1.35188	0.157798	2.19722	0.383803	0.6	330000	1	0.104676	0.287657
002602	2018	2	0.875	3.73687	Automobile manufacturing		23.5414	0.0558321	2.63906	1.13824	0.157755	2.19722	0.456221	0	330000	0	0.0532607	0.287657
002829	2019	1	1	3.84606	Computer, communication, and other electronic equipment manufacturing		21.1169	0.00970178	2.70805	1.06596	0.297775	1.94591	0.483556	0.333333	110000	0	0.0161216	0.356695
003009	2020	1	1	3.51899	Railway, ship, aerospace and other transportation equipment manufacturing		21.2756	0.0578373	2.94444	1.23914	0.254508	2.19722	0.500138	0.5	610000	1	0.118824	0.287657
003009	2021	1	1	3.42649	Railway, ship, aerospace and other transportation equipment manufacturing		21.3479	0.0634592	2.99573	1.17906	0.245492	1.94591	0.500138	0.5	610000	1	0.0306271	0.356695
003009	2022	1	1	3.47796	Railway, ship, aerospace and other transportation equipment manufacturing		21.814	0.0473382	3.04452	0.890945	0.395313	2.19722	0.500138	0.571429	610000	1	0.0371445	0.287657
003009	2023	2	1.5	3.60082	Railway, ship, aerospace and other transportation equipment manufacturing		21.8409	0.0309176	3.09104	1.33893	0.386378	2.19722	0.500135	0.5	610000	1	0.0172359	0.287657
003033	2021	1	1	3.53848	General equipment manufacturing		21.0477	0.0553791	3.13549	0.804854	0.275092	1.94591	0.538557	0.125	370000	0	0.170225	0.356695
003033	2022	2	1.5	3.53394	General equipment manufacturing		21.2794	0.0929736	3.17805	0.887703	0.319617	1.94591	0.550007	0.142857	370000	0	0.26385	0.356695
003033	2023	1	1	3.44617	Railway, ship, aerospace and other transportation equipment manufacturing		21.5334	0.0503107	3.21888	0.802634	0.394174	1.94591	0.545679	0.125	370000	0	0.218254	0.356695
300011	2015	5	1.352	3.59108	Railway, ship, aerospace and other transportation equipment manufacturing		21.8576	0.0810293	2.63906	1.58696	0.287671	2.30259	0.450271	0.375	110000	0	0.0712679	0.336472
300123	2011	1	1	3.42969	Railway, ship, aerospace and other transportation equipment manufacturing		20.9398	0.0348385	2.19722	0.852074	0.292742	2.19722	0.441733	0.571429	430000	0	0	0.287657
300123	2012	1	1	3.31389	Railway, ship, aerospace and other transportation equipment manufacturing		21.0507	0.0388481	2.30259	0.876204	0.321926	2.19722	0.433399	0.444444	430000	0	0	0.287657
300123	2016	1	1	3.50813	Railway, ship, aerospace and other transportation equipment manufacturing		21.5026	0.00701131	2.63906	1.2533	0.377738	1.79176	0.433417	0.454545	430000	0	0.0683326	0.405465
300589	2021	1	1	3.52212	Railway, ship, aerospace and other transportation equipment manufacturing		21.0937	0.0280336	2.94444	1.23145	0.380013	2.07944	0.438109	0.25	440000	0	0	0.318454
300719	2020	1	1	3.65874	Railway, ship, aerospace and other transportation equipment manufacturing		21.0903	0.0640489	2.99573	1.33373	0.240368	2.07944	0.457146	0.428571	110000	0	0.19487	0.318454
300719	2021	1	1	3.639	Railway, ship, aerospace and other transportation equipment manufacturing		20.9631	0.00816911	3.04452	1.2022	0.18361	2.07944	0.418629	0.428571	110000	0	0.0776099	0.318454
300906	2023	1	1	3.63801	Railway, ship, aerospace and other transportation equipment manufacturing		20.6839	0.06116	2.89037	1.12361	0.0918782	1.94591	0.465407	0.166667	360000	0	0.0597621	0.356695
300960	2022	6	1.694	3.38544	Railway, ship, aerospace and other transportation equipment manufacturing		20.6189	0.0321202	3.13549	0.835858	0.254969	2.19722	0.559596	1	440000	0	0.106711	0.287657
300960	2023	4	1.594	3.49515	Railway, ship, aerospace and other transportation equipment manufacturing		20.63	0.038592	3.17805	0.895356	0.262206	2.19722	0.559596	0.857143	440000	0	0.0636296	0.287657
301016	2021	1	1	3.22576	Railway, ship, aerospace and other transportation equipment manufacturing		20.794	0.111748	2.77259	0.922646	0.153388	2.19722	0.562507	0.5	320000	0	0.0225743	0.287657
600099	2019	2	0.875	3.42813	Railway, ship, aerospace and other transportation equipment manufacturing		20.2365	0.00939079	3.13549	1.27512	0.19222	2.07944	0.398264	0	320000	1	0.172843	0.318454
600099	2020	1	1	3.63117	Railway, ship, aerospace and other transportation equipment manufacturing		20.1885	0.0130971	3.17805	1.24566	0.161096	2.19722	0.402247	0.2	320000	1	0.0851336	0.287657
600099	2021	1	1	3.57895	Railway, ship, aerospace and other transportation equipment manufacturing		20.3489	0.0137394	3.21888	1.38197	0.250006	2.19722	0.379751	0.2	320000	1	0.0878307	0.287657
600099	2022	1	1	3.57404	Railway, ship, aerospace and other transportation equipment manufacturing		20.4623	0.012024	3.2581	1.3439	0.298542	2.19722	0.384794	0.2	320000	1	0.156354	0.287657
600099	2023	2	0.875	3.53717	Railway, ship, aerospace and other transportation equipment manufacturing		20.5577	0.015587	3.29584	1.39653	0.335399	2.19722	0.383481	0.25	320000	1	0.175042	0.287657
600150	2011	4	1.594	3.36598	Special equipment manufacturing		24.6303	0.0457776	2.63906	0.770203	0.475193	2.70805	0.557827	0	310000	1	0	0.287657
600150	2012	3	1.389	3.3555	Railway, ship, aerospace and other transportation equipment manufacturing		24.5381	0.000409714	2.70805	0.820678	0.448574	2.70805	0.544583	0	310000	1	0.0256293	0.287657
600150	2013	4	1.316	3.40615	Railway, ship, aerospace and other transportation equipment manufacturing		24.6556	-4.27745e-05	2.77259	0.817643	0.477375	2.70805	0.535407	0	310000	1	0	0.287657
600150	2014	4	1.417	3.31983	Railway, ship, aerospace and other transportation equipment manufacturing		24.6704	-0.000779833	2.83321	0.956511	0.483461	2.70805	0.494771	0	310000	1	0	0.287657
600150	2015	6	1.764	3.46338	Railway, ship, aerospace and other transportation equipment manufacturing		24.6616	-0.00456386	2.89037	0.938556	0.483165	2.56495	0.483571	0	310000	1	0.025222	0.325411
600150	2016	6	1.694	3.45162	Railway, ship, aerospace and other transportation equipment manufacturing		24.6838	-0.0592985	2.94444	0.877033	0.518071	2.70805	0.472294	0	310000	1	0	0.287657
600150	2017	8	1.804	3.6973	Railway, ship, aerospace and other transportation equipment manufacturing		24.6808	-0.0498315	2.99573	0.842712	0.5385	2.70805	0.469271	0	310000	1	0.0424422	0.287657
600150	2019	14	1.89	3.87691	Railway, ship, aerospace and other transportation equipment manufacturing		24.5154	0.0115776	3.09104	0.78897	0.421986	2.56495	0.47544	0.333333	310000	1	0.0853615	0.325411
600150	2020	15	1.922	3.76946	Railway, ship, aerospace and other transportation equipment manufacturing		25.7505	0.00167623	3.13549	0.719361	0.502968	2.63906	0.468049	0	310000	1	0.102637	0.30535
600150	2021	11	1.844	3.74675	Railway, ship, aerospace and other transportation equipment manufacturing		25.801	0.00144452	3.17805	0.786977	0.512183	2.56495	0.442387	0	310000	1	0.145606	0.287657
600150	2022	18	1.937	3.79689	Railway, ship, aerospace and other transportation equipment manufacturing		25.8136	0.00535663	3.21888	0.772584	0.524278	2.56495	0.442387	0	310000	1	0.025962	0.287657
600150	2023	33	1.959	3.82912	Railway, ship, aerospace and other transportation equipment manufacturing		25.9041	0.0164784	3.2581	0.894184	0.533525	2.48491	0.439374	0	310000	1	0.159939	0.287657
600316	2013	2	1.5	3.41789	Railway, ship, aerospace and other transportation equipment manufacturing		22.7295	0.0124623	2.70805	1.11029	0.306687	2.48491	0.420157	0.416667	360000	1	0.137769	0.287657
600316	2015	2	1.5	3.35321	Railway, ship, aerospace and other transportation equipment manufacturing		22.9868	0.00824324	2.83321	1.15981	0.370872	2.48491	0.431818	0.416667	360000	1	0.212965	0.287657
600316	2017	2	1.5	3.36477	Railway, ship, aerospace and other transportation equipment manufacturing		22.9796	0.00328399	2.94444	0.935254	0.394992	2.48491	0.425818	0.4	360000	1	0.191975	0.287657
600316	2018	2	0.875	3.36249	Railway, ship, aerospace and other transportation equipment manufacturing		22.9925	0.0153147	2.99573	0.80105	0.401875	2.48491	0.408154	0.4	360000	1	0.160085	0.287657
600316	2019	5	1.587	3.39535	Railway, ship, aerospace and other transportation equipment manufacturing		22.8558	0.00986171	3.04452	0.923114	0.343263	2.30259	0.407585	0.444444	360000	1	0.167559	0.287657
600316	2020	3	1.667	3.41423	Railway, ship, aerospace and other transportation equipment manufacturing		22.9925	0.0137415	3.09104	1.738	0.38497	2.19722	0.413383	0.4	360000	1	0.232343	0.287657
600316	2023	3	1.667	3.41298	Railway, ship, aerospace and other transportation equipment manufacturing		23.4717	0.00207884	3.21888	0.968115	0.507384	2.19722	0.404675	0.333333	360000	1	0.070336	0.287657
600391	2023	1	1	3.26223	Railway, ship, aerospace and other transportation equipment manufacturing		22.6879	0.0149132	3.21888	0.928197	0.497722	2.19722	0.325954	0.714286	510000	1	0.0819459	0.287657
600495	2016	1	1	3.54711	Railway, ship, aerospace and other transportation equipment manufacturing		22.0267	0.00729096	2.83321	1.2639	0.145743	2.07944	0.282609	0.25	140000	1	0.30664	0.318454
600495	2018	1	1	3.57452	Railway, ship, aerospace and other transportation equipment manufacturing		22.0829	0.00913082	2.94444	0.903258	0.176181	1.94591	0.283118	0.285714	140000	1	0.362203	0.356695
600495	2019	3	1.389	3.51441	Railway, ship, aerospace and other transportation equipment manufacturing		22.0913	0.015181	2.99573	0.908168	0.172079	1.79176	0.282631	0.285714	140000	1	0.335643	0.405465
600495	2020	2	1.5	3.57197	Railway, ship, aerospace and other transportation equipment manufacturing		22.0866	0.00516507	3.04452	0.893671	0.160317	1.94591	0.278817	0.4	140000	1	0.20347	0.356695
600495	2021	1	1	3.58275	Railway, ship, aerospace and other transportation equipment manufacturing		22.1132	0.00268792	3.09104	0.879786	0.177804	1.79176	0.281742	0.4	140000	1	0.186412	0.405465
600495	2022	2	0.875	3.51469	Railway, ship, aerospace and other transportation equipment manufacturing		22.0963	0.00266115	3.13549	0.818038	0.165042	1.79176	0.282057	0.333333	140000	1	0.355219	0.405465
600501	2014	1	1	3.35241	Automobile manufacturing		22.1369	0.0242451	2.77259	1.09079	0.49842	2.19722	0.433504	0.333333	320000	1	0.12608	0.287657
600501	2015	4	1.594	3.49968	Automobile manufacturing		22.28	0.007586	2.83321	1.31107	0.409493	2.19722	0.415358	0.4	320000	1	0.16174	0.287657
600501	2016	5	1.6	3.65769	Automobile manufacturing		22.2743	0.0083449	2.89037	1.12559	0.399437	2.19722	0.422306	0.2	320000	1	0.0582406	0.287657
600501	2017	4	1.75	3.71664	Automobile manufacturing		22.2752	0.0070505	2.94444	0.939289	0.397574	2.19722	0.428927	0.4	320000	1	0.0862107	0.287657
600501	2018	1	1	3.8377	Automobile manufacturing		22.23	-0.0325553	2.99573	0.725589	0.40491	2.19722	0.406234	0.333333	320000	1	0.043419	0.287657
600501	2019	4	1.594	3.76742	Automobile manufacturing		22.2793	0.0105892	3.04452	0.79508	0.419045	2.19722	0.406018	0.4	320000	1	0.0338786	0.287657
600501	2020	2	1.5	3.96675	Automobile manufacturing		22.3681	0.0124294	3.09104	0.871663	0.437189	2.19722	0.407931	0.4	320000	1	0.0643033	0.287657
600501	2021	16	1.928	3.95172	Automobile manufacturing		22.499	0.0131231	3.13549	0.953383	0.465471	2.19722	0.406427	0.4	320000	1	0.059238	0.287657
600501	2022	3	1.667	3.96597	Automobile manufacturing		22.564	0.0137733	3.17805	0.854401	0.473839	2.19722	0.404969	0.4	320000	1	0.0142392	0.287657
600501	2023	4	1.75	3.99577	Special equipment manufacturing		22.47	0.0144423	3.21888	0.947304	0.446961	1.94591	0.390184	0.4	320000	1	0	0.356695
600685	2015	1	1	3.66589	Railway, ship, aerospace and other transportation equipment manufacturing		24.615	0.00211829	3.13549	0.828351	0.581309	2.3979	0.614612	0	440000	1	0.132586	0.310128
600685	2017	2	0.875	3.68083	Railway, ship, aerospace and other transportation equipment manufacturing		24.511	0.00227649	3.21888	0.800602	0.547813	2.3979	0.592095	0	440000	1	0.0823284	0.310128
600685	2018	2	1.5	3.56885	Railway, ship, aerospace and other transportation equipment manufacturing		24.5835	-0.0535215	3.2581	0.687973	0.529217	2.3979	0.59268	0	440000	1	0.0958894	0.310128
600685	2019	1	1	3.74009	Railway, ship, aerospace and other transportation equipment manufacturing		24.6803	0.0175971	3.29584	0.722173	0.532241	2.3979	0.59179	0	440000	1	0.0545987	0.310128
600685	2023	3	1.389	3.89278	Railway, ship, aerospace and other transportation equipment manufacturing		24.6524	0.0014383	3.43399	0.783268	0.479031	2.30259	0.575253	0	440000	1	0.135231	0.336472
600760	2021	1	1	3.49835	Railway, ship, aerospace and other transportation equipment manufacturing		24.8629	0.0266636	3.3673	1.36798	0.590049	2.56495	0.550104	0.625	370000	1	0.0251617	0.26827
600818	2013	2	1.5	3.80771	Railway, ship, aerospace and other transportation equipment manufacturing		20.409	0.0377846	3.04452	1.80834	0.367698	1.60944	0.370508	0	310000	0	0.105919	0.336472
600818	2018	1	1	3.67001	Railway, ship, aerospace and other transportation equipment manufacturing		20.7546	-0.00444517	3.2581	1.44587	0.320012	1.79176	0.380096	0	310000	0	0.105472	0.287657
600818	2022	1	1	3.61761	Railway, ship, aerospace and other transportation equipment manufacturing		20.64	-0.0991355	3.4012	2.11643	0.313871	1.79176	0.268014	0	310000	0	0.20676	0.405465
600818	2023	1	1	3.67552	Railway, ship, aerospace and other transportation equipment manufacturing		20.6021	0.0221091	3.43399	1.58525	0.308678	1.60944	0.113144	0	310000	0	0.208174	0.451967
600862	2011	2	0.875	3.4155	General equipment manufacturing		22.1089	0.028566	3.17805	0.851733	0.517673	1.94591	0.326235	0.133333	320000	1	0.0308096	0.356695
600862	2016	3	1.074	3.49477	Railway, ship, aerospace and other transportation equipment manufacturing		22.8662	0.00796235	3.3673	1.06668	0.467701	2.19722	0.515126	0.2	320000	1	0.0720124	0.287657
600862	2017	4	1.316	3.40962	Railway, ship, aerospace and other transportation equipment manufacturing		22.6842	0.0117124	3.4012	1.02807	0.408648	2.19722	0.508425	0.5	320000	1	0.0860931	0.287657
600862	2018	6	1.471	3.52178	Railway, ship, aerospace and other transportation equipment manufacturing		22.7621	0.0459459	3.43399	0.923009	0.406341	2.19722	0.508425	0.6	320000	1	0.119719	0.287657
600862	2019	6	1.483	3.55474	Railway, ship, aerospace and other transportation equipment manufacturing		22.6013	0.082779	3.46574	1.31018	0.307262	2.19722	0.502065	0.75	320000	1	0.150939	0.287657
600862	2020	3	1.16	3.50877	Railway, ship, aerospace and other transportation equipment manufacturing		22.599	0.0637932	3.49651	2.04786	0.281882	2.19722	0.467557	0.5	320000	1	0.15049	0.287657
600862	2021	2	0.875	3.6479	Railway, ship, aerospace and other transportation equipment manufacturing		22.6581	0.0819576	3.52636	2.13899	0.258568	2.19722	0.432489	0.75	320000	1	0.0962795	0.287657
600879	2018	1	1	3.9533	Special equipment manufacturing		23.9757	0.0191047	3.49651	0.731023	0.417366	2.19722	0.260947	0.5	420000	1	0.300356	0.287657
600879	2019	7	1.755	3.85959	Special equipment manufacturing		24.0984	0.0170053	3.52636	0.74171	0.44185	2.19722	0.251864	0.666667	420000	1	0.241113	0.287657
600879	2020	5	1.7	3.88655	Special equipment manufacturing		24.1638	0.01683	3.55535	0.799222	0.45234	2.19722	0.260038	0.666667	420000	1	0.232228	0.287657
600879	2021	4	1.594	4.05541	Special equipment manufacturing		24.238	0.0175291	3.58352	0.809472	0.457403	2.19722	0.252445	0.666667	420000	1	0.163228	0.287657
600893	2017	1	1	3.87677	Railway, ship, aerospace and other transportation equipment manufacturing		24.6684	0.0179351	3.21888	0.921928	0.352413	2.30259	0.461232	0.416667	610000	1	0.0247415	0.336472
600893	2018	2	1.5	3.83459	Railway, ship, aerospace and other transportation equipment manufacturing		24.703	0.0200494	3.2581	0.831404	0.357124	2.3979	0.459183	0.363636	610000	1	0.0735085	0.310128
600893	2019	5	1.406	3.7519	Railway, ship, aerospace and other transportation equipment manufacturing		24.8682	0.0174166	3.29584	0.773699	0.351341	2.3979	0.452001	0.333333	610000	1	0.0329519	0.310128
600893	2020	13	1.908	3.80568	Railway, ship, aerospace and other transportation equipment manufacturing		24.8876	0.017958	3.3322	1.24801	0.348724	2.3979	0.427448	0.222222	610000	1	0.0197791	0.310128
600893	2021	12	1.882	3.98414	Railway, ship, aerospace and other transportation equipment manufacturing		25.2303	0.0134901	3.3673	1.17728	0.444318	2.3979	0.436905	0.222222	610000	1	0.0964836	0.310128
600893	2022	18	1.937	3.80408	Railway, ship, aerospace and other transportation equipment manufacturing		25.2227	0.0149157	3.4012	1.00633	0.432495	2.3979	0.436506	0.25	610000	1	0.0876089	0.310128
600893	2023	22	1.925	3.89541	Railway, ship, aerospace and other transportation equipment manufacturing		25.3264	0.0151066	3.43399	0.939572	0.445035	2.3979	0.430615	0.25	610000	1	0.0734005	0.310128
600960	2012	1	1	3.31288	Automobile manufacturing		21.4395	0.0206608	2.63906	0.82178	0.436581	1.94591	0.41459	0.166667	370000	1	0.13739	0.356695
600960	2013	1	1	3.36531	Automobile manufacturing		21.4626	0.0286183	2.70805	0.845282	0.424791	1.94591	0.422395	0.166667	370000	1	0.152095	0.356695
600960	2014	2	0.875	3.34527	Automobile manufacturing		21.8154	0.0323815	2.77259	0.847455	0.263317	1.94591	0.474032	0.166667	370000	1	0.215266	0.356695
600960	2015	1	1	3.629	Automobile manufacturing		21.8227	0.00506709	2.83321	1.05397	0.265837	2.3979	0.330152	0.166667	370000	1	0.15146	0.310128
600960	2016	2	1.5	3.56639	Automobile manufacturing		22.6248	0.021071	2.89037	0.845095	0.300548	2.3979	0.42818	0.2	370000	1	0	0.310128
600960	2017	1	1	3.59226	Automobile manufacturing		22.6374	0.0338049	2.94444	0.807471	0.266589	2.3979	0.428592	0.25	370000	1	0.159829	0.310128
600960	2018	2	1.5	3.62034	Automobile manufacturing		22.9727	0.0130141	2.99573	0.619628	0.370891	2.3979	0.409656	0.166667	370000	1	0.109711	0.310128
600960	2019	2	1.5	3.53075	Automobile manufacturing		22.9086	0.00822373	3.04452	0.600968	0.353807	2.3979	0.40508	0.166667	370000	1	0.055539	0.310128
600960	2020	1	1	3.65765	Automobile manufacturing		22.9423	0.00233711	3.09104	0.645638	0.35609	2.30259	0.404708	0.166667	370000	1	0.0518385	0.26827
600960	2021	1	1	3.72967	Automobile manufacturing		22.833	-0.0106273	3.13549	0.606657	0.308729	2.19722	0.404708	0.2	370000	1	0.153814	0.287657
600960	2022	1	1	3.69327	Automobile manufacturing		22.7234	-0.00935205	3.17805	0.596431	0.319934	2.19722	0.404708	0	370000	1	0.201482	0.287657
600960	2023	2	0.875	3.70025	Automobile manufacturing		22.7499	-0.025684	3.21888	0.648922	0.340895	2.19722	0.404708	0	370000	1	0.318202	0.287657
600967	2020	3	1.389	3.79783	Railway, ship, aerospace and other transportation equipment manufacturing		24.13	0.0215518	3.04452	0.857376	0.516358	2.48491	0.472272	0.444444	150000	1	0.104771	0.405465
600967	2023	1	1	3.73838	Railway, ship, aerospace and other transportation equipment manufacturing		23.8905	0.0348745	3.17805	0.746049	0.416582	2.19722	0.459077	0.444444	150000	1	0.122136	0.451967
601299	2014	1	1	3.46058	Railway, ship, aerospace and other transportation equipment manufacturing		25.7282	0.037439	1.94591	0.789158	0.507068	1.94591	0.563044	0.333333	110000	1	0.289309	0.451967
601890	2011	1	1	3.4299	Railway, ship, aerospace and other transportation equipment manufacturing		22.0508	0.0269529	2.48491	0.771189	0.207977	2.19722	0.352623	0.25	320000	0	0	0.287657
601890	2017	1	1	3.3	Railway, ship, aerospace and other transportation equipment manufacturing		22.0597	0.00717214	2.89037	1.03924	0.183137	2.19722	0.324495	0.25	320000	0	0.159319	0.287657
601890	2018	2	1.5	3.23373	Railway, ship, aerospace and other transportation equipment manufacturing		22.0519	-0.00633512	2.94444	0.742166	0.187382	2.19722	0.324495	0.25	320000	0	0.128436	0.287657
601890	2019	1	1	3.22499	Railway, ship, aerospace and other transportation equipment manufacturing		22.0833	0.0228451	2.99573	0.96163	0.188595	2.19722	0.319974	0.3	320000	0	0.120096	0.287657
601890	2021	1	1	3.24304	Railway, ship, aerospace and other transportation equipment manufacturing		22.1433	0.0288741	3.09104	1.21522	0.196178	2.19722	0.326098	0.25	320000	0	0.123195	0.287657
601890	2022	3	1.074	3.23062	Railway, ship, aerospace and other transportation equipment manufacturing		22.2526	0.0324015	3.13549	1.13426	0.241536	2.19722	0.325665	0.25	320000	0	0.0893717	0.287657
601890	2023	3	1.389	3.23097	Railway, ship, aerospace and other transportation equipment manufacturing		22.3131	0.0467013	3.17805	1.16338	0.233962	2.19722	0.321498	0.307692	320000	0	0.0888684	0.287657
603111	2015	1	1	3.8074	Railway, ship, aerospace and other transportation equipment manufacturing		21.6548	0.0739784	2.77259	1.23842	0.433674	2.19722	0.263471	0.272727	320000	0	0.131538	0.287657
603111	2016	2	1.5	3.93139	Railway, ship, aerospace and other transportation equipment manufacturing		21.7111	0.0909099	2.83321	1.33732	0.39464	2.19722	0.263576	0.272727	320000	0	0.131711	0.287657
603111	2017	3	1.667	4.11257	Railway, ship, aerospace and other transportation equipment manufacturing		22.7122	0.0387266	2.89037	0.953779	0.376538	2.19722	0.25119	0.3	320000	0	0.121681	0.287657
603111	2018	4	1.75	3.97068	Railway, ship, aerospace and other transportation equipment manufacturing		22.2807	-0.812491	2.94444	0.851126	0.489651	2.3979	0.208974	0.3	320000	0	0.132218	0.310128
603111	2019	2	1.5	3.79824	Railway, ship, aerospace and other transportation equipment manufacturing		22.2691	0.132914	2.99573	0.903672	0.363968	2.19722	0.208974	0.222222	320000	0	0.166705	0.287657
603111	2020	3	1.389	3.9608	Railway, ship, aerospace and other transportation equipment manufacturing		22.4123	0.0748628	3.04452	0.870599	0.361814	2.19722	0.203082	0.125	320000	0	0.169693	0.287657
603111	2021	1	1	3.91495	Railway, ship, aerospace and other transportation equipment manufacturing		22.4875	0.063188	3.09104	0.820502	0.345279	2.19722	0.205892	0.111111	320000	0	0.153862	0.287657
603111	2022	2	1.5	3.86953	Railway, ship, aerospace and other transportation equipment manufacturing		22.5137	0.0473446	3.13549	0.719606	0.320219	2.19722	0.205892	0.1	320000	0	0.141559	0.287657
603111	2023	2	1.5	3.8691	Railway, ship, aerospace and other transportation equipment manufacturing		22.5651	0.0566232	3.17805	0.770746	0.309582	2.19722	0.209372	0.1	320000	0	0.102913	0.287657
603500	2019	3	1.074	3.28536	Railway, ship, aerospace and other transportation equipment manufacturing		20.6825	0.0883437	3.13549	0.869811	0.0647688	2.19722	0.513663	0.125	330000	0	0.0655686	0.287657
603529	2021	18	1.79	3.55537	Railway, ship, aerospace and other transportation equipment manufacturing		23.3183	0.048639	3.13549	0.770684	0.487531	2.19722	0.582933	0	120000	0	0.0531531	0.287657
603680	2018	1	1	3.38883	Railway, ship, aerospace and other transportation equipment manufacturing		22.7489	0.0577628	2.77259	0.729408	0.40328	2.19722	0.625664	0.333333	320000	0	0.27098	0.287657
603680	2020	3	1.667	3.64344	Railway, ship, aerospace and other transportation equipment manufacturing		22.9298	0.0417106	2.89037	0.807338	0.407416	2.19722	0.625988	0.416667	320000	0	0.285541	0.287657
603680	2021	1	1	3.62727	Railway, ship, aerospace and other transportation equipment manufacturing		22.895	0.0374299	2.94444	0.824893	0.376665	2.19722	0.626466	0.363636	320000	0	0.158845	0.287657
603680	2022	2	1.5	3.61208	Railway, ship, aerospace and other transportation equipment manufacturing		22.8936	0.0194207	2.99573	0.775267	0.377202	2.19722	0.630109	0.363636	320000	0	0.227152	0.287657
603680	2023	1	1	3.71966	Railway, ship, aerospace and other transportation equipment manufacturing		22.9109	0.0280135	3.04452	0.819863	0.364185	2.19722	0.627622	0.181818	320000	0	0.24452	0.287657
603766	2017	2	1.5	3.76684	Railway, ship, aerospace and other transportation equipment manufacturing		23.1551	0.0891072	2.3979	0.97727	0.311084	2.07944	0.446709	0.125	500000	0	0.0330992	0.318454
603766	2018	2	1.5	3.76084	Railway, ship, aerospace and other transportation equipment manufacturing		23.2067	0.080098	2.48491	0.747184	0.344422	2.07944	0.457243	0.1	500000	0	0.0275613	0.318454
603766	2019	2	0.875	3.62812	Railway, ship, aerospace and other transportation equipment manufacturing		23.2983	0.0449055	2.56495	0.698106	0.355308	1.60944	0.454685	0.1	500000	0	0.103949	0.451967
603766	2020	4	1.437	3.70951	Railway, ship, aerospace and other transportation equipment manufacturing		23.2979	0.0346079	2.63906	0.679027	0.353756	2.19722	0.453153	0.0909091	500000	0	0.237882	0.287657
603766	2021	3	1.389	3.683	Railway, ship, aerospace and other transportation equipment manufacturing		23.3048	0.0274366	2.70805	0.819236	0.345514	2.07944	0.446655	0.1	500000	0	0.0384811	0.318454
603766	2022	3	1.389	3.86024	Railway, ship, aerospace and other transportation equipment manufacturing		23.2558	0.0379937	2.77259	0.76418	0.303237	1.94591	0.441178	0.111111	500000	0	0.0300549	0.356695
603766	2023	2	0.875	3.86211	Railway, ship, aerospace and other transportation equipment manufacturing		23.3581	0.0334485	2.83321	0.768025	0.333222	2.19722	0.467732	0.1	500000	0	0.0416091	0.287657
688015	2019	1	1	3.89488	Railway, ship, aerospace and other transportation equipment manufacturing		21.9904	0.0346428	2.3979	0.807439	0.525882	2.19722	0.39182	0.666667	110000	0	0.11721	0.287657
688015	2020	6	1.833	4.00023	Railway, ship, aerospace and other transportation equipment manufacturing		22.1932	0.053692	2.48491	0.959649	0.528689	2.19722	0.389536	0.714286	110000	0	0.108214	0.287657
688015	2021	5	1.7	3.92518	Railway, ship, aerospace and other transportation equipment manufacturing		22.3894	0.0545916	2.56495	0.8859	0.440213	2.19722	0.386011	0.8125	110000	0	0.0644899	0.287657
688015	2022	9	1.802	3.90992	Railway, ship, aerospace and other transportation equipment manufacturing		22.4493	0.0450178	2.63906	0.853521	0.435064	2.19722	0.385375	0.764706	110000	0	0.0786956	0.287657
688015	2023	7	1.806	3.94555	Railway, ship, aerospace and other transportation equipment manufacturing		22.4661	0.0220055	2.70805	0.769869	0.431745	2.19722	0.384274	0.769231	110000	0	0.0808491	0.287657
688187	2021	14	1.842	4.01602	Railway, ship, aerospace and other transportation equipment manufacturing		24.5109	0.0450529	2.83321	0.792979	0.219884	2.30259	0.604639	0.727273	430000	1	0.127825	0.405465
688187	2022	8	1.792	3.98971	Railway, ship, aerospace and other transportation equipment manufacturing		24.605	0.0520536	2.89037	0.755301	0.240902	2.3979	0.610915	0.681818	430000	1	0.110712	0.435347
688187	2023	9	1.827	3.91324	Railway, ship, aerospace and other transportation equipment manufacturing		24.7012	0.0573111	2.94444	0.716476	0.257554	2.07944	0.612881	0.652174	430000	1	0.136992	0.405465
688239	2022	1	1	3.34853	Railway, ship, aerospace and other transportation equipment manufacturing		21.8181	0.059549	2.83321	1.46566	0.459277	2.19722	0.313449	0.625	520000	0	0.155493	0.287657
688239	2023	2	1.5	3.44275	Railway, ship, aerospace and other transportation equipment manufacturing		21.9496	0.0526481	2.89037	1.13528	0.40586	1.94591	0.300695	0.555556	520000	0	0.150232	0.356695
688285	2021	8	1.753	3.34518	Railway, ship, aerospace and other transportation equipment manufacturing		21.8387	0.0467664	2.70805	0.763852	0.412536	2.19722	0.587205	0.625	610000	1	0.141556	0.287657
688285	2022	10	1.797	3.39683	Railway, ship, aerospace and other transportation equipment manufacturing		21.8786	0.0452642	2.77259	0.740388	0.402711	2.19722	0.57912	0.5	610000	1	0.102549	0.287657
688285	2023	6	1.764	3.41914	Railway, ship, aerospace and other transportation equipment manufacturing		21.8914	0.0189066	2.83321	0.757607	0.401087	2.19722	0.565931	0.529412	610000	1	0.141114	0.287657
688367	2022	1	1	3.87279	Railway, ship, aerospace and other transportation equipment manufacturing		20.5158	0.0609544	3.13549	1.00658	0.262077	2.19722	0.337724	0.545455	340000	0	0.0856525	0.287657
688367	2023	2	1.5	3.91251	Railway, ship, aerospace and other transportation equipment manufacturing		20.4705	0.0254208	3.17805	1.0826	0.229625	1.79176	0.329602	0.615385	340000	0	0.0737677	0.287657
688569	2022	6	1.44	3.60792	Railway, ship, aerospace and other transportation equipment manufacturing		21.9705	0.076545	2.83321	0.766738	0.16526	2.19722	0.559616	0.714286	110000	1	0.0916224	0.287657
601766	2011	7	1.857	3.36893	Railway, ship, aerospace and other transportation equipment manufacturing		25.2536	0.0498563	1.60944	0.788811	0.529029	2.19722	0.567211	0.142857	110000	1	0	0.441861
601766	2012	9	1.796	3.32068	Railway, ship, aerospace and other transportation equipment manufacturing		25.3793	0.0450844	1.79176	0.783769	0.485196	2.07944	0.562636	0.222222	110000	1	0.101783	0.451967
601766	2013	8	1.875	3.35724	Railway, ship, aerospace and other transportation equipment manufacturing		25.5201	0.0410367	1.94591	0.760414	0.481787	2.07944	0.560116	0.222222	110000	1	0	0.451967
601766	2014	7	1.729	3.57121	Railway, ship, aerospace and other transportation equipment manufacturing		25.7377	0.0431023	2.07944	0.780772	0.505498	1.94591	0.549933	0.25	110000	1	0.110585	0.356695
601766	2015	7	1.857	3.73252	Railway, ship, aerospace and other transportation equipment manufacturing		25.9664	0.0442369	2.19722	0.970324	0.492023	2.3979	0.559325	0.375	110000	1	0.336297	0.374662
601766	2016	6	1.694	3.75334	Railway, ship, aerospace and other transportation equipment manufacturing		26.0627	0.040293	2.30259	0.85633	0.491062	2.07944	0.562733	0.428571	110000	1	0.250366	0.451967
601766	2017	15	1.8	3.90916	Railway, ship, aerospace and other transportation equipment manufacturing		26.0998	0.0340938	2.3979	0.891088	0.48357	2.07944	0.56567	0.333333	110000	1	0.237177	0.405465
601766	2018	10	1.875	3.94106	Railway, ship, aerospace and other transportation equipment manufacturing		26.2497	0.0357118	2.48491	0.808198	0.458265	1.94591	0.535987	0.333333	110000	1	0.173444	0.356695
601766	2019	19	1.94	3.87012	Railway, ship, aerospace and other transportation equipment manufacturing		26.3951	0.0354051	2.56495	0.740001	0.461167	1.94591	0.534766	0.25	110000	1	0.0926245	0.356695
601766	2020	22	1.944	3.82733	Railway, ship, aerospace and other transportation equipment manufacturing		26.4299	0.0346224	2.63906	0.674887	0.450397	1.94591	0.535264	0.25	110000	1	0.134137	0.451967
601766	2021	22	1.916	3.84156	Railway, ship, aerospace and other transportation equipment manufacturing		26.4523	0.0286776	2.70805	0.685656	0.45293	1.94591	0.531526	0.125	110000	1	0.0638855	0.356695
601766	2022	15	1.864	3.937	Railway, ship, aerospace and other transportation equipment manufacturing		26.4438	0.031945	2.77259	0.649717	0.449828	1.94591	0.534872	0.125	110000	1	0.0634409	0.356695
601766	2023	16	1.851	3.88367	Railway, ship, aerospace and other transportation equipment manufacturing		26.4403	0.0304143	2.83321	0.651349	0.459608	1.79176	0.535768	0	110000	1	0.0776099	0.405465
000901	2011	3	1.074	4.01246	Instrumentation manufacturing		20.8735	0.0540208	2.56495	1.31843	0.226066	2.3979	0.334573	0.25	230000	1	0.232524	0.310128
000901	2012	1	1	4.04364	Railway, ship, aerospace and other transportation equipment manufacturing		21.0266	0.0318879	2.63906	1.09201	0.323531	2.3979	0.340456	0.166667	230000	1	0.250681	0.310128
000901	2013	1	1	4.06626	Railway, ship, aerospace and other transportation equipment manufacturing		21.2067	0.0311927	2.70805	1.32998	0.367077	2.3979	0.368662	0	230000	1	0.206421	0.310128
000901	2014	1	1	3.9697	Railway, ship, aerospace and other transportation equipment manufacturing		21.4782	0.0178978	2.77259	1.86409	0.274571	2.3979	0.362	0	230000	1	0.217407	0.310128
000901	2017	2	1.5	4.04494	Railway, ship, aerospace and other transportation equipment manufacturing		22.559	0.0285143	2.94444	1.03748	0.311084	2.07944	0.320109	0.5	230000	1	0.0543908	0.405465
000901	2021	1	1	4.18805	Automobile manufacturing		22.7479	0.00534851	3.13549	0.918993	0.349264	2.30259	0.312794	0.4	230000	1	0.246336	0.336472
603787	2021	18	1.79	3.68809	Railway, ship, aerospace and other transportation equipment manufacturing		21.7608	0.00350306	2.70805	1.05286	0.497286	2.19722	0.559828	0	320000	0	0.0973425	0.287657
300594	2021	1	1	3.7047	Railway, ship, aerospace and other transportation equipment manufacturing		21.0768	0.00384933	3.09104	0.882657	0.294927	2.19722	0.359672	0.75	370000	0	0	0.287657
300594	2023	1	1	3.59104	Railway, ship, aerospace and other transportation equipment manufacturing		21.3288	-0.00235481	3.17805	0.930672	0.402278	2.19722	0.339998	0.857143	370000	0	0.0810936	0.287657
688586	2020	1	1	3.36043	Railway, ship, aerospace and other transportation equipment manufacturing		21.8176	0.0628872	2.63906	1.02074	0.302945	2.19722	0.520267	0.7	340000	1	0.240153	0.287657
688563	2023	1	1	3.42052	Railway, ship, aerospace and other transportation equipment manufacturing		23.1659	0.0488751	3.17805	0.802267	0.121847	2.07944	0.544064	0.625	110000	1	0.0698963	0.318454
000420	2017	2	1.5	3.18222	Chemical Fiber Manufacturing		22.5446	0.0137273	3.21888	0.901278	0.438373	2.3979	0.29757	0.4	220000	1	0.0422539	0.310128
000420	2018	2	1.5	3.20676	Chemical Fiber Manufacturing		22.689	0.0195246	3.2581	0.74075	0.464458	2.3979	0.28638	0.2	220000	1	0.044531	0.310128
000420	2019	2	1.5	3.20699	Chemical Fiber Manufacturing		22.8608	0.0117196	3.29584	0.759428	0.497067	2.3979	0.392821	0.2	220000	1	0	0.310128
000420	2020	2	1.5	3.19064	Chemical Fiber Manufacturing		22.8852	-0.0270566	3.3322	0.727769	0.495792	2.3979	0.382791	0.2	220000	1	0.0755361	0.310128
000420	2022	6	1.764	3.19503	Chemical Fiber Manufacturing		23.076	-0.00825915	3.4012	0.936139	0.462552	2.3979	0.264925	0.2	220000	1	0.0177846	0.310128
000687	2017	7	1.709	3.62108	Computer, communication, and other electronic equipment manufacturing		22.1399	0.00911806	3.04452	1.13473	0.504588	2.07944	0.384503	0.142857	130000	0	0.0488617	0.405465
000687	2018	8	1.761	3.57856	Computer, communication, and other electronic equipment manufacturing		22.136	-0.120988	3.09104	1.121	0.56662	1.94591	0.388503	0.166667	130000	0	0.0618754	0.356695
000703	2019	1	1	3.81973	Chemical Fiber Manufacturing		25.1686	0.0460952	3.4012	0.741411	0.506217	1.94591	0.447369	0	450000	0	0.140771	0.356695
000703	2020	1	1	3.82524	Chemical Fiber Manufacturing		25.2479	0.0405142	3.43399	0.77205	0.513821	2.19722	0.459854	0	450000	0	0.135776	0.287657
000703	2021	3	1.16	3.8011	Chemical Fiber Manufacturing		25.3824	0.0368159	3.46574	0.719057	0.523494	2.19722	0.44785	0	450000	0	0.0526493	0.287657
000703	2022	7	1.857	3.76098	Chemical Fiber Manufacturing		25.4415	-0.00829043	3.49651	0.662088	0.535509	2.19722	0.439026	0	450000	0	0.0202293	0.287657
000703	2023	10	1.854	3.7526	Chemical Fiber Manufacturing		25.4059	0.00340624	3.52636	0.658848	0.533092	2.19722	0.44032	0	450000	0	0.163156	0.287657
000782	2012	1	1	3.34028	Chemical Fiber Manufacturing		21.467	0.01588	3.04452	0.766385	0.392684	1.94591	0.228087	0.166667	440000	0	0.0984078	0.356695
000936	2021	1	1	3.65453	Chemical Fiber Manufacturing		22.6288	0.0530841	3.3673	0.724275	0.212652	1.94591	0.36439	0	320000	0	0.266659	0.356695
000936	2022	1	1	3.6252	Chemical Fiber Manufacturing		22.5786	0.0326037	3.4012	0.648212	0.190252	1.94591	0.359198	0	320000	0	0.271686	0.356695
000936	2023	1	1	3.59491	Chemical Fiber Manufacturing		22.5884	0.0111499	3.43399	0.841192	0.188701	2.19722	0.355512	0	320000	1	0.260941	0.287657
000949	2016	1	1	3.29307	Chemical Fiber Manufacturing		22.4632	0.0199596	3.17805	0.95826	0.316903	2.19722	0.417835	0.571429	410000	1	0.0376409	0.287657
002064	2011	1	1	3.32032	Chemical Fiber Manufacturing		21.4853	0.0234252	2.56495	1.0233	0.211299	2.07944	0.425321	0	330000	0	0	0.318454
002064	2013	3	1.16	3.33478	Chemical Fiber Manufacturing		21.7448	0.0949915	2.70805	1.2742	0.28543	2.19722	0.388353	0	330000	0	0.0574211	0.287657
002064	2014	1	1	3.41022	Chemical Fiber Manufacturing		22.2123	0.0886022	2.77259	1.11372	0.255548	2.19722	0.365488	0.25	330000	0	0	0.287657
002064	2015	1	1	3.49466	Chemical Fiber Manufacturing		22.4069	0.0461117	2.83321	1.1822	0.32002	2.19722	0.356941	0.333333	330000	0	0	0.287657
002064	2016	1	1	3.45756	Chemical Fiber Manufacturing		22.4073	-0.058048	2.89037	1.11129	0.364798	2.19722	0.356941	0.25	330000	0	0	0.287657
002064	2017	2	1.5	3.41684	Chemical Fiber Manufacturing		22.4392	0.0670114	2.94444	1.02768	0.328373	2.19722	0.356941	0.333333	330000	0	0.217301	0.287657
002064	2018	1	1	3.55978	Chemical Fiber Manufacturing		22.5047	0.0722952	2.99573	0.917854	0.307408	2.19722	0.357894	0.285714	330000	0	0.178248	0.287657
002206	2021	1	1	3.48955	Chemical Fiber Manufacturing		22.6594	0.080293	3.04452	1.04934	0.425531	1.94591	0.323033	0.3	330000	0	0.204291	0.356695
002206	2022	5	1.8	3.48263	Chemical Fiber Manufacturing		22.7362	0.043682	3.09104	0.858428	0.424695	1.94591	0.347257	0.384615	330000	0	0.2622	0.356695
002206	2023	4	1.75	3.67007	Chemical Fiber Manufacturing		22.7028	0.0473616	3.13549	0.803464	0.398108	1.94591	0.329244	0.4	330000	0	0.239999	0.356695
002254	2011	2	1.5	3.38948	Chemical Fiber Manufacturing		21.5588	0.0600545	2.94444	1.14885	0.19828	2.19722	0.365693	0.6	370000	1	0.0384663	0.287657
002254	2012	2	1.5	3.30496	Chemical Fiber Manufacturing		21.5092	0.0202907	2.99573	1.04148	0.190633	2.19722	0.365302	0.75	370000	1	0	0.287657
002254	2014	3	1.667	3.38176	Chemical Fiber Manufacturing		21.6776	0.0626145	3.09104	1.24041	0.194996	2.19722	0.351107	0.6	370000	1	0	0.287657
002254	2015	3	1.667	3.31488	Chemical Fiber Manufacturing		21.6624	0.041776	3.13549	1.60339	0.162257	2.19722	0.348964	0.6	370000	1	0	0.287657
002254	2016	2	1.5	3.22672	Chemical Fiber Manufacturing		21.6782	0.0242812	3.17805	1.40447	0.155993	2.19722	0.339721	0.6	370000	1	0	0.287657
002254	2017	2	1.5	3.29476	Chemical Fiber Manufacturing		21.6861	0.0399502	3.21888	1.35544	0.151978	2.19722	0.351455	0.4	370000	1	0.0491741	0.287657
002254	2018	2	1.5	3.33999	Chemical Fiber Manufacturing		22.0569	0.0387381	3.2581	1.13054	0.301922	2.19722	0.337759	0.4	370000	1	0.0988295	0.287657
002254	2019	3	1.389	3.43364	Chemical Fiber Manufacturing		22.1831	0.0486368	3.29584	1.04741	0.313056	2.19722	0.349081	0.25	370000	1	0.233929	0.287657
002254	2020	2	0.875	3.51354	Chemical Fiber Manufacturing		22.5532	0.0450552	3.3322	0.957664	0.317254	2.3979	0.350234	0.2	370000	1	0.10662	0.310128
002254	2021	1	1	3.53775	Chemical Fiber Manufacturing		22.8191	0.12966	3.3673	0.985653	0.364355	2.3979	0.348986	0.428571	370000	1	0.0389812	0.310128
002254	2022	6	1.833	3.60256	Chemical Fiber Manufacturing		23.0292	0.047192	3.4012	0.964568	0.432577	2.3979	0.337644	0.428571	370000	1	0.0413795	0.310128
002254	2023	7	1.713	3.67896	Chemical Fiber Manufacturing		23.3348	0.0262164	3.43399	0.848057	0.341867	2.3979	0.317201	0.333333	370000	1	0.024115	0.310128
300876	2020	1	1	3.28245	Chemical Fiber Manufacturing		20.4811	0.0971395	2.19722	1.05837	0.0522359	1.60944	0.495915	0.142857	440000	0	0.193278	0.336472
300876	2022	2	1.5	3.2819	Chemical Fiber Manufacturing		20.9359	0.0393324	2.30259	0.912788	0.246998	1.60944	0.497576	0.142857	440000	0	0.105667	0.336472
301057	2023	1	1	3.50972	Chemical Fiber Manufacturing		20.6139	0.0556919	2.99573	0.951611	0.130724	1.60944	0.456239	0	330000	0	0.0304345	0.336472
600063	2011	2	1.5	3.3884	Chemical Fiber Manufacturing		22.4064	0.0236774	2.70805	0.774476	0.413962	2.19722	0.34664	0.5	340000	1	0	0.287657
600063	2013	2	1.5	3.33228	Chemical Fiber Manufacturing		22.5509	0.00443967	2.83321	0.736269	0.463478	2.19722	0.276065	0.5	340000	1	0.0310874	0.287657
600063	2015	3	1.389	3.28357	Chemical Fiber Manufacturing		22.7306	0.0145679	2.94444	1.06803	0.410143	2.07944	0.322274	0.2	340000	1	0.101466	0.318454
600063	2016	1	1	3.19128	Chemical Fiber Manufacturing		22.8881	0.0125693	2.99573	0.884419	0.458598	2.07944	0.327616	0.2	340000	1	0.134539	0.318454
600063	2018	3	1.389	3.41729	Chemical Fiber Manufacturing		22.9393	0.0140905	3.09104	0.685741	0.402758	2.19722	0.300806	0.181818	340000	1	0.138324	0.287657
600063	2019	3	1.667	3.47142	Chemical Fiber Manufacturing		22.9548	0.0405052	3.13549	0.814909	0.370483	2.19722	0.302134	0.181818	340000	1	0.149267	0.287657
600063	2020	2	1.5	3.55987	Chemical Fiber Manufacturing		23.0943	0.0555063	3.17805	0.754686	0.384377	2.19722	0.292935	0.333333	340000	1	0.0537836	0.287657
600063	2021	1	1	3.43463	Chemical Fiber Manufacturing		23.1789	0.0805823	3.21888	0.90319	0.374625	2.07944	0.299188	0.363636	340000	1	0.0489215	0.318454
600063	2023	2	1.5	3.56853	Chemical raw materials and chemical products manufacturing		23.3689	0.0235281	3.29584	0.730603	0.355383	2.19722	0.328137	0.428571	340000	1	0.105854	0.287657
600527	2019	1	1	3.22093	Chemical Fiber Manufacturing		21.6347	0.0325455	3.17805	0.796329	0.0572808	1.94591	0.298584	0	320000	0	0.158433	0.356695
600527	2021	1	1	3.59937	Chemical Fiber Manufacturing		21.6503	0.0397881	3.2581	0.993632	0.0547575	1.94591	0.305755	0	320000	0	0.144513	0.356695
600527	2022	1	1	3.57708	Chemical Fiber Manufacturing		21.6398	0.0328616	3.29584	0.914265	0.0596098	1.94591	0.330174	0	320000	0	0.187595	0.356695
600667	2020	1	1	3.72999	Computer, communication, and other electronic equipment manufacturing		23.7885	0.0433734	3.43399	0.918851	0.48268	2.3979	0.368736	0.25	320000	1	0.0337984	0.310128
600889	2023	7	1.65	3.39675	Chemical Fiber Manufacturing		21.1868	-0.154415	3.46574	1.01462	0.358342	1.94591	0.413161	0.222222	320000	1	0.122595	0.356695
601113	2013	2	0.875	3.33478	Chemical Fiber Manufacturing		21.8474	0.0255174	2.48491	0.757126	0.356038	2.19722	0.569717	0.375	330000	0	0.115635	0.287657
601113	2022	1	1	3.75257	Chemical Fiber Manufacturing		22.4464	0.0627277	3.04452	0.703792	0.258695	2.19722	0.335664	0	330000	0	0.193841	0.287657
601208	2015	1	1	3.84828	Chemical raw materials and chemical products manufacturing		21.9238	0.0202829	3.09104	1.11194	0.26501	1.94591	0.324337	0	510000	0	0	0.356695
601208	2017	1	1	3.84495	Chemical raw materials and chemical products manufacturing		21.8267	0.0342425	3.17805	0.924328	0.201351	1.94591	0.306283	0.25	510000	0	0.0275918	0.356695
601208	2018	1	1	3.85612	Chemical raw materials and chemical products manufacturing		21.8795	0.0102478	3.21888	0.685679	0.22761	1.94591	0.306283	0.4	510000	0	0.0775496	0.356695
601208	2019	1	1	3.8458	Chemical raw materials and chemical products manufacturing		21.8954	0.0220307	3.2581	0.80228	0.243622	1.94591	0.302879	0.2	510000	0	0.0634167	0.356695
601208	2021	1	1	3.86843	Chemical raw materials and chemical products manufacturing		22.5325	0.0547618	3.3322	1.35302	0.331879	1.94591	0.262566	0.285714	510000	0	0.0331559	0.356695
601208	2022	3	1.667	3.85797	Chemical raw materials and chemical products manufacturing		22.9265	0.0458033	3.3673	0.976127	0.417173	1.94591	0.261123	0.333333	510000	0	0.0515259	0.356695
601208	2023	4	1.75	3.92892	Chemical raw materials and chemical products manufacturing		23.0185	0.0304078	3.4012	0.976283	0.422209	1.94591	0.262167	0.333333	510000	0	0.0607998	0.356695
603225	2018	6	1.833	3.44585	Chemical Fiber Manufacturing		23.5664	0.0796281	2.94444	0.723764	0.418662	2.07944	0.541854	0.285714	330000	0	0.0538778	0.318454
603225	2019	6	1.833	3.63175	Chemical Fiber Manufacturing		23.8544	0.0574719	2.99573	0.707663	0.399334	2.07944	0.516604	0.333333	330000	0	0.080214	0.318454
603225	2020	9	1.651	3.70403	Chemical Fiber Manufacturing		24.0698	0.0210094	3.04452	0.812675	0.4549	2.07944	0.517605	0.3	330000	0	0.125132	0.318454
603225	2021	10	1.672	3.44069	Chemical Fiber Manufacturing		24.3478	0.0583565	3.09104	0.772392	0.446037	2.07944	0.477149	0.3	330000	0	0.124089	0.318454
603225	2022	14	1.75	3.80917	Chemical Fiber Manufacturing		24.4442	-0.00497698	3.13549	0.704469	0.482359	2.07944	0.481434	0.3	330000	0	0.097282	0.318454
603225	2023	10	1.685	3.8284	Chemical Fiber Manufacturing		24.533	0.0237768	3.17805	0.746225	0.487285	2.07944	0.47365	0.181818	330000	0	0.306611	0.318454
688065	2020	10	1.748	3.29018	Chemical Fiber Manufacturing		23.2194	0.0369945	3.04452	0.778944	0.0522359	2.19722	0.477262	0.833333	310000	0	0.214692	0.287657
688065	2021	10	1.656	3.25435	Chemical Fiber Manufacturing		23.5082	0.0391466	3.09104	1.26994	0.0891704	2.07944	0.464389	0.8	310000	0	0.0985145	0.318454
688065	2022	7	1.53	3.42567	Chemical Fiber Manufacturing		23.604	0.0337888	3.13549	0.926229	0.145354	2.07944	0.461852	0.777778	310000	0	0.107211	0.318454
688065	2023	8	1.625	3.40905	Chemical Fiber Manufacturing		23.6589	0.0214602	3.17805	0.96909	0.195228	1.94591	0.447465	0.7	310000	0	0.0929173	0.356695
688295	2023	1	1	3.59901	Chemical Fiber Manufacturing		22.9784	0.0328008	2.89037	0.857748	0.40007	2.19722	0.641855	0.2	320000	1	0.153005	0.287657
836077	2021	1	1	3.20284	Chemical Fiber Manufacturing		21.5639	0.127354	2.63906	1.41987	0.489439	1.94591	0.582032	0	220000	1	0.0543612	0.251303
836077	2022	2	0.875	3.19503	Chemical Fiber Manufacturing		21.9883	0.163553	2.70805	1.16802	0.457783	1.94591	0.569447	0	220000	1	0.0901999	0.251303
836077	2023	1	1	3.19329	Chemical Fiber Manufacturing		22.381	0.0431447	2.77259	0.973059	0.43005	1.79176	0.537899	0	220000	1	0.180932	0.287657
000782	2014	2	1.5	3.3124	Chemical Fiber Manufacturing		21.6568	-0.0979775	3.13549	1.03905	0.403354	2.19722	0.342121	0.2	440000	0	0	0.287657
000782	2016	3	1.667	3.19257	Chemical Fiber Manufacturing		21.6572	-0.0325885	3.21888	1.17663	0.421367	2.19722	0.332041	0.333333	440000	0	0.14646	0.287657
000782	2017	2	1.5	3.26622	Chemical Fiber Manufacturing		21.692	0.0138731	3.2581	1.07773	0.425428	2.19722	0.336189	0.285714	440000	0	0	0.287657
000782	2018	4	1.75	3.21106	Chemical Fiber Manufacturing		21.7857	0.0131197	3.29584	0.800483	0.397945	2.07944	0.331921	0.285714	440000	0	0.0838714	0.318454
000782	2019	2	1.5	3.21079	Chemical Fiber Manufacturing		21.7029	0.0040554	3.3322	0.751756	0.372145	2.07944	0.313477	0.25	440000	0	0.0976862	0.318454
000782	2020	2	1.5	3.27396	Chemical Fiber Manufacturing		21.7609	0.0128699	3.3673	0.738245	0.39861	2.19722	0.315946	0.25	440000	0	0.102339	0.287657
000782	2021	1	1	3.29139	Chemical Fiber Manufacturing		21.8718	0.0176838	3.4012	0.927064	0.42458	2.07944	0.292334	0.25	440000	0	0.0381047	0.318454
000782	2022	1	1	3.23228	Chemical Fiber Manufacturing		21.87	-0.0176936	3.43399	0.813326	0.437647	2.19722	0.286095	0.25	440000	0	0	0.287657
000782	2023	1	1	3.34386	Chemical Fiber Manufacturing		21.946	-0.0429141	3.46574	0.909363	0.488025	2.19722	0.26849	0.375	440000	0	0.065198	0.287657
600810	2012	2	0.875	3.30243	Chemical Fiber Manufacturing		22.9822	-0.0347193	2.99573	0.69691	0.562629	2.19722	0.468248	0.625	410000	1	0.127236	0.287657
600810	2013	1	1	3.33045	Chemical Fiber Manufacturing		22.6144	0.00344686	3.04452	0.728453	0.500418	2.19722	0.443871	0.666667	410000	1	0.11641	0.287657
600810	2014	2	0.875	3.23447	Chemical Fiber Manufacturing		22.792	0.0108188	3.09104	0.730652	0.514947	2.19722	0.44934	0.6	410000	1	0.117138	0.287657
600810	2017	1	1	3.20909	Chemical Fiber Manufacturing		23.019	0.013082	3.21888	0.699343	0.530259	2.19722	0.426165	0.333333	410000	1	0.0682393	0.287657
600810	2018	2	1.5	3.20626	Chemical Fiber Manufacturing		23.1179	0.0842456	3.2581	0.713323	0.491131	2.19722	0.434299	0.333333	410000	1	0.0510315	0.287657
600810	2019	2	1.5	3.30218	Chemical Fiber Manufacturing		23.3555	0.0357431	3.29584	0.703515	0.527434	2.19722	0.409027	0.333333	410000	1	0.0471415	0.287657
600810	2020	1	1	3.33505	Chemical Fiber Manufacturing		23.7229	0.0188611	3.3322	0.730491	0.544299	2.19722	0.51904	0.285714	410000	1	0.11587	0.287657
600810	2021	3	1.389	3.40485	Chemical Fiber Manufacturing		23.9774	0.0802285	3.3673	0.752866	0.517595	2.19722	0.47911	0.2	410000	1	0.114123	0.287657
600810	2022	1	1	3.43984	Chemical Fiber Manufacturing		24.0321	0.0159747	3.4012	0.664449	0.482831	2.19722	0.479674	0	410000	1	0.13831	0.287657
600810	2023	1	1	3.47874	Chemical Fiber Manufacturing		24.1714	0.00666945	3.43399	0.628667	0.487372	2.19722	0.51206	0	410000	1	0.117169	0.287657
601233	2023	1	1	3.86699	Chemical Fiber Manufacturing		25.3526	0.0079859	3.21888	0.696347	0.501205	2.3979	0.354185	0.5	330000	0	0.108033	0.310128
000422	2011	3	1.389	3.33781	Chemical raw materials and chemical products manufacturing		24.0109	0.0461998	2.99573	0.738989	0.551809	2.3979	0.225708	0	420000	1	0.214186	0.310128
000422	2012	1	1	3.4064	Chemical raw materials and chemical products manufacturing		24.1127	0.0485179	3.04452	0.723517	0.550918	2.3979	0.254193	0	420000	1	0.0940542	0.310128
000422	2015	3	1.389	3.39164	Chemical raw materials and chemical products manufacturing		24.4116	0.00135588	3.17805	0.690732	0.586779	2.3979	0.256718	0	420000	1	0.0957669	0.310128
000422	2021	1	1	3.40142	Chemical raw materials and chemical products manufacturing		23.7614	0.0949893	3.4012	1.0031	0.593223	2.07944	0.2849	0.5	420000	1	0.073671	0.318454
000422	2022	6	1.694	3.26704	Chemical raw materials and chemical products manufacturing		23.7022	0.129964	3.43399	0.843868	0.503066	2.56495	0.267966	0.3	420000	1	0.0244302	0.427422
000422	2023	3	1.667	3.29702	Chemical raw materials and chemical products manufacturing		23.7883	0.0368923	3.46574	0.739724	0.467573	2.48491	0.307474	0.3	420000	1	0.0494172	0.405465
000523	2022	1	1	3.58523	Chemical raw materials and chemical products manufacturing		21.5731	-0.0310632	3.66356	1.36248	0.460606	1.79176	0.404619	0.4	440000	1	0.227044	0.287657
000523	2023	1	1	3.6764	Chemical raw materials and chemical products manufacturing		21.8913	0.0304145	3.68888	1.09216	0.415565	1.94591	0.43452	0	440000	1	0.0607277	0.356695
000525	2013	1	1	3.37419	Chemical raw materials and chemical products manufacturing		23.0573	0.0353911	3.13549	0.795943	0.503772	2.19722	0.487044	0.4	320000	0	0.133077	0.287657
000525	2014	1	1	3.28288	Chemical raw materials and chemical products manufacturing		23.0971	0.0370574	3.17805	0.867139	0.488999	2.19722	0.490288	0.4	320000	0	0.172643	0.287657
000525	2016	1	1	3.45836	Chemical raw materials and chemical products manufacturing		23.0798	0.0119604	3.2581	0.886331	0.432235	2.19722	0.534706	0.333333	320000	0	0.247738	0.287657
000525	2017	1	1	3.53806	Chemical raw materials and chemical products manufacturing		23.2286	0.0560771	3.29584	0.892359	0.437329	2.19722	0.51331	0.333333	320000	0	0.227217	0.287657
000525	2018	2	1.5	3.65167	Chemical raw materials and chemical products manufacturing		23.3196	0.0464069	3.3322	0.797294	0.497163	2.19722	0.51331	0.285714	320000	0	0.407139	0.287657
000525	2019	1	1	3.74153	Chemical raw materials and chemical products manufacturing		23.3452	-0.0247793	3.3673	0.732229	0.513076	2.19722	0.463767	0.333333	320000	0	0.427753	0.287657
000525	2020	1	1	3.70286	Chemical raw materials and chemical products manufacturing		23.1693	-0.0130002	3.4012	0.667327	0.497169	2.19722	0.445543	0.5	320000	0	0.364472	0.287657
000635	2012	1	1	3.33757	Chemical raw materials and chemical products manufacturing		22.0114	0.00833961	2.83321	0.686948	0.231763	2.19722	0.475521	0	640000	1	0.189386	0.287657
000662	2013	1	1	3.56254	Chemical raw materials and chemical products manufacturing		20.6027	-0.0728058	3.04452	1.146	0.284832	2.19722	0.233224	0	450000	0	0	0.287657
000683	2019	1	1	3.62379	Chemical raw materials and chemical products manufacturing		23.8811	0.0364439	3.13549	0.628399	0.394099	2.48491	0.339666	0.142857	150000	0	0.139339	0.287657
000698	2011	3	1.16	3.38826	Chemical raw materials and chemical products manufacturing		22.6456	0.0303697	2.94444	0.723721	0.424555	2.19722	0.304001	0.111111	210000	1	0	0.287657
000707	2011	2	0.875	3.33766	Chemical raw materials and chemical products manufacturing		22.806	0.0430682	2.94444	0.780496	0.555325	2.19722	0.236058	0	420000	1	0	0.287657
000731	2017	1	1	3.24244	Chemical raw materials and chemical products manufacturing		22.1988	0.0332279	3.17805	0.899508	0.321476	1.94591	0.185804	0.285714	510000	1	0.15066	0.356695
000731	2018	1	1	3.28429	Chemical raw materials and chemical products manufacturing		22.1462	0.0523206	3.21888	0.701847	0.263775	1.79176	0.210459	0.375	510000	1	0.260077	0.405465
000731	2021	1	1	3.3404	Chemical raw materials and chemical products manufacturing		22.2076	0.139179	3.3322	0.940267	0.167707	1.79176	0.186328	0.333333	510000	1	0.0339745	0.405465
000731	2022	1	1	3.36837	Chemical raw materials and chemical products manufacturing		22.3669	0.132861	3.3673	0.726353	0.156832	1.94591	0.187059	0.428571	510000	1	0.0524284	0.356695
000731	2023	3	1.667	3.43553	Chemical raw materials and chemical products manufacturing		22.4662	0.0692125	3.4012	0.671125	0.19343	1.94591	0.18884	0.333333	510000	1	0.0846985	0.356695
000755	2011	1	1	3.33835	Chemical raw materials and chemical products manufacturing		22.7006	0.000516618	2.77259	0.757085	0.516803	2.56495	0.335162	0.333333	140000	1	0	0.26827
000791	2011	2	0.875	3.3384	Chemical raw materials and chemical products manufacturing		20.4329	-0.0156945	2.70805	1.04156	0.438311	1.94591	0.350272	0.166667	620000	1	0.263291	0.356695
000822	2011	2	0.875	3.33796	Chemical raw materials and chemical products manufacturing		22.6397	0.0533509	2.63906	0.762613	0.348466	2.19722	0.354084	0	370000	1	0.187463	0.287657
000822	2013	2	0.875	3.37053	Chemical raw materials and chemical products manufacturing		22.4159	-0.186873	2.77259	0.772519	0.48036	1.94591	0.348338	0	370000	1	0.374896	0.356695
000822	2015	1	1	3.32522	Chemical raw materials and chemical products manufacturing		22.0354	0.0323633	2.89037	1.15561	0.329439	2.19722	0.363309	0	370000	1	0.256996	0.287657
000822	2017	3	1.074	3.21999	Chemical raw materials and chemical products manufacturing		22.1839	0.142114	2.99573	1.17247	0.299976	2.07944	0.370444	0	370000	1	0.164393	0.318454
000822	2018	2	0.875	3.30775	Chemical raw materials and chemical products manufacturing		22.2451	0.120562	3.04452	0.796498	0.239059	2.19722	0.366846	0	370000	1	0.204207	0.287657
000822	2019	3	1.074	3.22646	Chemical raw materials and chemical products manufacturing		22.2315	0.0355589	3.09104	0.804416	0.233322	2.19722	0.36243	0	370000	1	0.15421	0.287657
000822	2020	2	0.875	3.26133	Chemical raw materials and chemical products manufacturing		22.1833	-0.0602382	3.13549	0.753024	0.262577	1.79176	0.361998	0.2	370000	1	0.152876	0.405465
000822	2021	3	1.389	3.2301	Chemical raw materials and chemical products manufacturing		22.4408	0.10317	3.17805	0.910298	0.313581	2.19722	0.371344	0.2	370000	1	0.37298	0.287657
000822	2022	5	1.618	3.2194	Chemical raw materials and chemical products manufacturing		22.6547	0.149005	3.21888	0.886045	0.337827	2.19722	0.362081	0.166667	370000	1	0.12092	0.287657
000822	2023	3	1.389	3.2612	Chemical raw materials and chemical products manufacturing		22.8091	0.121917	3.2581	0.75113	0.306741	2.19722	0.349933	0.166667	370000	1	0.206229	0.287657
000830	2012	1	1	3.33799	Chemical raw materials and chemical products manufacturing		23.4911	0.0210361	2.70805	0.710438	0.510992	1.94591	0.350998	0.142857	370000	1	0.0404259	0.451967
000830	2023	1	1	3.56769	Chemical raw materials and chemical products manufacturing		24.2866	0.0229694	3.2581	0.716687	0.417084	1.79176	0.424178	0.181818	370000	1	0.0982833	0.451967
000912	2016	1	1	3.32013	Chemical raw materials and chemical products manufacturing		22.7599	-0.0869025	2.89037	1.0966	0.634951	1.60944	0.442079	0	510000	1	0.0615579	0.336472
000912	2019	1	1	3.42226	Chemical raw materials and chemical products manufacturing		22.6375	0.0405676	3.04452	0.864161	0.228155	2.19722	0.392459	0.333333	510000	1	0.18179	0.287657
000912	2020	2	1.5	3.27423	Chemical raw materials and chemical products manufacturing		22.784	0.0474975	3.09104	0.744369	0.270248	2.07944	0.392459	0.333333	510000	1	0.156569	0.318454
000912	2021	1	1	3.53469	Chemical raw materials and chemical products manufacturing		22.9941	0.0456049	3.13549	0.878136	0.331618	2.07944	0.392459	0.2	510000	1	0.168826	0.318454
000912	2022	3	1.667	3.46371	Chemical raw materials and chemical products manufacturing		23.0668	0.0345778	3.17805	0.747149	0.335823	2.07944	0.381603	0.2	510000	1	0.152863	0.318454
000912	2023	4	1.417	3.57982	Chemical raw materials and chemical products manufacturing		23.0641	0.0139902	3.21888	0.734159	0.32462	2.07944	0.381228	0.2	510000	1	0.143531	0.318454
000930	2011	1	1	3.38909	Food manufacturing		22.5916	0.0542851	2.63906	0.894292	0.435872	2.19722	0.258386	0.272727	340000	1	0	0.287657
000930	2012	2	0.875	3.30847	Chemical raw materials and chemical products manufacturing		22.6488	0.0289484	2.70805	0.800222	0.439898	2.07944	0.213538	0.285714	340000	1	0.3555	0.318454
000930	2013	1	1	3.36915	Chemical raw materials and chemical products manufacturing		22.6029	0.00767469	2.77259	0.768433	0.423836	2.19722	0.219918	0.230769	340000	1	0.142217	0.287657
000930	2014	2	0.875	3.27631	Chemical raw materials and chemical products manufacturing		22.6496	0.00459173	2.83321	0.9796	0.436855	2.19722	0.224182	0.25	340000	1	0.0467593	0.287657
000930	2015	2	0.875	3.39239	Chemical raw materials and chemical products manufacturing		22.4546	-0.203161	2.89037	1.44574	0.543122	2.19722	0.194445	0.153846	340000	1	0.089706	0.287657
000930	2016	5	1.352	3.23417	Chemical raw materials and chemical products manufacturing		22.4161	0.0242197	2.94444	1.40389	0.522443	2.19722	0.200352	0.0909091	340000	1	0.09401	0.287657
000930	2017	6	1.562	3.21953	Chemical raw materials and chemical products manufacturing		22.5076	0.0410641	2.99573	1.3816	0.513236	2.19722	0.206116	0	340000	1	0.15104	0.287657
000930	2018	12	1.758	3.23131	Chemical raw materials and chemical products manufacturing		23.7333	0.025182	3.04452	0.736242	0.421696	2.19722	0.467405	0	340000	1	0.270794	0.287657
000930	2019	7	1.713	3.22604	Chemical raw materials and chemical products manufacturing		23.5657	0.0320549	3.09104	0.718347	0.340262	2.19722	0.467339	0	340000	1	0.23367	0.287657
000930	2020	11	1.738	3.22164	Chemical raw materials and chemical products manufacturing		23.7429	0.0302061	3.13549	0.753228	0.387087	2.07944	0.45275	0	340000	1	0.306956	0.318454
000930	2022	9	1.768	3.42707	Chemical raw materials and chemical products manufacturing		23.6192	0.0569609	3.21888	0.774304	0.269086	2.07944	0.451873	0	340000	1	0.223026	0.318454
000930	2023	8	1.651	3.30524	Chemical raw materials and chemical products manufacturing		23.5301	-0.0379309	3.2581	0.738065	0.296027	1.79176	0.457284	0	340000	1	0.123113	0.405465
001207	2021	1	1	3.35593	Chemical raw materials and chemical products manufacturing		21.3665	0.0829309	3.04452	0.854053	0.265125	1.79176	0.493856	0.2	370000	0	0.309606	0.405465
001207	2022	2	1.5	3.25344	Chemical raw materials and chemical products manufacturing		21.3886	0.0563534	3.09104	0.790472	0.264911	1.79176	0.488076	0.2	370000	0	0.380198	0.405465
001207	2023	2	1.5	3.29078	Chemical raw materials and chemical products manufacturing		21.5792	0.0698899	3.13549	0.802266	0.226194	1.79176	0.451897	0.2	370000	0	0.302588	0.405465
001217	2021	1	1	3.23174	Chemical raw materials and chemical products manufacturing		21.5565	0.166046	3.09104	0.911287	0.152509	2.19722	0.526498	0.555556	340000	0	0.192727	0.287657
001255	2022	1	1	3.26051	Chemical raw materials and chemical products manufacturing		20.7232	0.0692128	2.77259	0.906095	0.199559	2.19722	0.513572	0.75	330000	0	0.0765736	0.287657
001255	2023	1	1	3.24581	Chemical raw materials and chemical products manufacturing		20.6525	0.0352092	2.83321	0.94555	0.165357	2.19722	0.513572	0.75	330000	0	0.0301046	0.287657
001328	2023	3	1.545	3.63637	Chemical raw materials and chemical products manufacturing		21.3486	0.0728845	3.13549	0.901808	0.221588	2.19722	0.559616	0	500000	1	0.00967126	0.287657
002002	2021	1	1	3.73811	Chemical raw materials and chemical products manufacturing		23.6067	0.0467669	3.04452	0.914796	0.363948	2.07944	0.201034	0.25	320000	0	0.045073	0.318454
002002	2022	1	1	3.78861	Chemical raw materials and chemical products manufacturing		23.6564	0.0152238	3.09104	0.687694	0.37197	2.19722	0.173826	0.25	320000	0	0.0228086	0.287657
002010	2011	1	1	3.4085	Chemical raw materials and chemical products manufacturing		21.5898	0.0647612	2.3979	0.900155	0.265547	2.19722	0.393614	0	330000	0	0	0.287657
002010	2012	1	1	3.34572	Chemical raw materials and chemical products manufacturing		21.8193	0.0548537	2.48491	0.955972	0.31485	2.19722	0.403779	0	330000	0	0.0657916	0.287657
002010	2013	1	1	3.37437	Chemical raw materials and chemical products manufacturing		22.0136	0.0617663	2.56495	0.973846	0.359496	2.19722	0.413426	0	330000	0	0	0.287657
002010	2014	2	1.5	3.53322	Chemical raw materials and chemical products manufacturing		22.1995	0.0636959	2.63906	0.890914	0.4092	2.19722	0.408889	0	330000	0	0	0.287657
002010	2015	1	1	3.82697	Chemical raw materials and chemical products manufacturing		23.3962	0.0418146	2.70805	0.945332	0.206722	2.19722	0.544481	0	330000	0	0.0891061	0.287657
002010	2016	1	1	3.94598	Chemical raw materials and chemical products manufacturing		23.563	0.0436541	2.77259	0.861334	0.271019	2.19722	0.544481	0	330000	0	0	0.287657
002019	2015	1	1	3.31264	Pharmaceutical manufacturing		22.2377	0.076599	2.77259	1.22334	0.312219	1.94591	0.50666	0.166667	330000	0	0.226185	0.356695
002019	2016	1	1	3.22377	Pharmaceutical manufacturing		22.6668	0.0933615	2.83321	1.07886	0.365658	2.19722	0.432783	0.25	330000	0	0.0975813	0.287657
002053	2011	2	1.5	3.32175	Chemical raw materials and chemical products manufacturing		21.7449	0.0011079	2.30259	0.802791	0.479248	2.19722	0.416377	0	530000	1	0	0.287657
002054	2012	1	1	3.44175	Chemical raw materials and chemical products manufacturing		21.4718	0.0665708	2.3979	0.760305	0.190875	2.19722	0.42979	0.375	440000	0	0.0748853	0.287657
002057	2020	2	1.5	3.48952	Chemical raw materials and chemical products manufacturing		21.7589	0.060276	2.94444	1.05728	0.350862	2.19722	0.348972	0.25	340000	1	0.0351901	0.287657
002057	2021	1	1	3.68594	Chemical raw materials and chemical products manufacturing		22.3117	0.0488326	2.99573	1.02261	0.320917	2.19722	0.310116	0.285714	340000	1	0.124836	0.287657
002057	2022	2	1.5	3.72353	Chemical raw materials and chemical products manufacturing		22.3286	0.082697	3.04452	1.06935	0.284154	2.07944	0.297828	0.285714	340000	1	0.115485	0.318454
002057	2023	2	1.5	3.79151	Chemical raw materials and chemical products manufacturing		22.395	0.058641	3.09104	0.909403	0.295928	2.07944	0.299819	0.285714	340000	1	0	0.318454
002061	2012	1	1	3.40964	Chemical raw materials and chemical products manufacturing		21.4849	0.0274993	2.70805	0.827576	0.541829	2.3979	0.347546	0.285714	330000	1	0.0635673	0.310128
002061	2013	1	1	3.36966	Chemical raw materials and chemical products manufacturing		21.7208	0.0106561	2.77259	0.785042	0.433739	2.3979	0.40608	0.285714	330000	1	0.0308001	0.310128
002061	2015	1	1	3.37368	Chemical raw materials and chemical products manufacturing		21.6491	-0.0754137	2.89037	1.15857	0.501461	2.30259	0.287492	0.2	330000	1	0.0917794	0.336472
002092	2013	1	1	3.54061	Chemical raw materials and chemical products manufacturing		23.9423	0.00462048	2.56495	0.671655	0.50325	2.56495	0.347007	0	650000	1	0.139575	0.325411
002092	2014	2	1.5	3.56831	Chemical raw materials and chemical products manufacturing		24.18	0.0105738	2.63906	0.700884	0.517393	2.56495	0.305992	0	650000	1	0.0930904	0.325411
002092	2015	1	1	3.57297	Chemical raw materials and chemical products manufacturing		24.3349	0.00505062	2.70805	0.69639	0.516925	2.48491	0.321392	0.2	650000	1	0.0709769	0.34833
002092	2016	2	1.5	3.76725	Chemical raw materials and chemical products manufacturing		24.5663	0.0406513	2.77259	0.737786	0.496245	2.48491	0.35	0.222222	650000	1	0.100765	0.34833
002092	2017	5	1.8	3.66685	Chemical raw materials and chemical products manufacturing		24.7419	0.0431527	2.83321	0.770355	0.504281	2.56495	0.371091	0.25	650000	1	0.0665139	0.325411
002092	2018	4	1.75	3.80576	Chemical raw materials and chemical products manufacturing		24.7945	0.0427585	2.89037	0.655124	0.508722	2.56495	0.336104	0.25	650000	1	0	0.325411
002092	2019	8	1.875	3.71688	Chemical raw materials and chemical products manufacturing		24.8195	0.00317917	2.94444	0.632136	0.494187	2.48491	0.327209	0.142857	650000	1	0.0545913	0.34833
002092	2020	8	1.875	3.71612	Chemical raw materials and chemical products manufacturing		24.881	-0.000724791	2.99573	0.627278	0.510429	2.56495	0.335086	0.222222	650000	1	0.270034	0.325411
002092	2021	10	1.9	3.82271	Chemical raw materials and chemical products manufacturing		25.0153	0.0412594	3.04452	0.654044	0.452273	2.56495	0.300053	0.222222	650000	1	0.335804	0.325411
002092	2022	9	1.889	3.78059	Chemical raw materials and chemical products manufacturing		25.1111	0.0143015	3.09104	0.608721	0.463562	2.19722	0.283145	0.142857	650000	1	0.303903	0.287657
002092	2023	10	1.863	3.73128	Chemical raw materials and chemical products manufacturing		25.0073	-0.0449133	3.13549	0.595239	0.466621	2.07944	0.300609	0	650000	1	0.247809	0.318454
002094	2014	1	1	3.34836	Chemical raw materials and chemical products manufacturing		20.9283	0.0392905	2.89037	1.46602	0.395097	1.94591	0.38397	0	370000	0	0	0.356695
002125	2012	1	1	3.34124	Chemical raw materials and chemical products manufacturing		20.9467	-0.0371468	2.56495	0.907538	0.531806	2.07944	0.426754	0	430000	1	0.277675	0.318454
002136	2012	1	1	3.33868	Chemical raw materials and chemical products manufacturing		20.6477	0.0233591	2.07944	1.17415	0.272161	2.19722	0.360795	0.4	340000	1	0.0971323	0.287657
002165	2012	1	1	3.34676	Chemical raw materials and chemical products manufacturing		21.2895	0.0468368	2.94444	1.16124	0.360118	2.19722	0.334371	0.142857	320000	0	0.174409	0.287657
002165	2018	1	1	3.53741	Chemical raw materials and chemical products manufacturing		22.0141	0.00848808	3.21888	0.759471	0.46077	2.19722	0.331959	0.111111	320000	0	0.0995296	0.287657
002165	2019	1	1	3.53365	Chemical raw materials and chemical products manufacturing		22.063	0.0232511	3.2581	0.816082	0.462326	2.19722	0.337053	0.111111	320000	0	0.0782434	0.287657
002165	2020	1	1	3.53363	Chemical raw materials and chemical products manufacturing		22.1896	0.0269907	3.29584	0.873182	0.479231	2.19722	0.31344	0.125	320000	0	0.0684261	0.287657
002165	2021	2	1.5	3.53777	Chemical raw materials and chemical products manufacturing		22.4175	0.00504082	3.3322	0.862611	0.474578	2.19722	0.276679	0.125	320000	0	0.0826331	0.287657
002165	2022	5	1.549	3.5298	Chemical raw materials and chemical products manufacturing		22.4467	-0.0149416	3.3673	0.773133	0.492875	2.19722	0.258859	0.142857	320000	0	0.0819039	0.287657
002165	2023	4	1.594	3.52787	Chemical raw materials and chemical products manufacturing		22.3082	0.00781378	3.4012	0.795547	0.457713	2.19722	0.232851	0.25	320000	0	0.146128	0.287657
002167	2011	1	1	3.33825	Chemical raw materials and chemical products manufacturing		21.5247	0.0389049	2.83321	1.20137	0.272672	1.94591	0.359714	0	440000	0	0	0.356695
002211	2012	1	1	3.34319	Chemical raw materials and chemical products manufacturing		21.7072	0.00169446	2.3979	0.739945	0.30494	2.19722	0.44585	0.333333	320000	0	0.180736	0.287657
002211	2020	1	1	3.59978	Chemical raw materials and chemical products manufacturing		20.4588	-0.411964	2.94444	1.398	0.399273	1.60944	0.353074	0	310000	0	0.196788	0.336472
002215	2012	1	1	3.42234	Chemical raw materials and chemical products manufacturing		21.425	0.0633106	2.07944	0.92247	0.273818	1.94591	0.449514	0.5	440000	0	0.035427	0.356695
002215	2015	1	1	3.66052	Chemical raw materials and chemical products manufacturing		21.8472	0.0730595	2.3979	1.76242	0.354334	1.94591	0.418591	0.5	440000	0	0.102654	0.356695
002215	2016	1	1	3.77771	Chemical raw materials and chemical products manufacturing		21.8702	-0.0918911	2.48491	1.39086	0.369305	1.94591	0.408096	0.5	440000	0	0	0.356695
002215	2017	3	1.667	3.79376	Chemical raw materials and chemical products manufacturing		22.2367	0.0681632	2.56495	1.01363	0.409174	1.94591	0.422957	0.6	440000	0	0	0.356695
002215	2018	5	1.7	3.58947	Chemical raw materials and chemical products manufacturing		22.4321	0.0601909	2.63906	0.914563	0.40953	1.60944	0.412742	0.5	440000	0	0.12553	0.336472
002215	2019	3	1.667	3.6527	Chemical raw materials and chemical products manufacturing		22.4956	0.0417685	2.70805	0.887219	0.412555	1.60944	0.400625	0.5	440000	0	0	0.336472
002215	2020	3	1.389	3.72371	Chemical raw materials and chemical products manufacturing		22.5103	0.0288327	2.77259	0.845146	0.407887	1.60944	0.351596	0.5	440000	0	0	0.336472
002215	2021	3	1.389	3.62959	Chemical raw materials and chemical products manufacturing		22.7791	0.037338	2.83321	0.809966	0.429675	1.60944	0.329326	0.4	440000	0	0.0120309	0.336472
002215	2022	2	1.5	3.62764	Chemical raw materials and chemical products manufacturing		23.005	0.0328616	2.89037	0.731575	0.446704	1.60944	0.316135	0.4	440000	0	0	0.336472
002215	2023	2	0.875	3.65476	Chemical raw materials and chemical products manufacturing		23.1091	0.0186484	2.94444	0.829734	0.47658	1.60944	0.321325	0.4	440000	0	0	0.336472
002217	2013	1	1	3.68728	Chemical raw materials and chemical products manufacturing		21.0837	-0.0485156	2.3979	0.90106	0.35182	2.19722	0.268324	0.166667	370000	0	0	0.287657
002217	2020	1	1	4.06858	Computer, communication, and other electronic equipment manufacturing		24.1368	-0.106998	2.89037	0.730827	0.50452	2.3979	0.355778	0.142857	350000	1	0.0318803	0.310128
002217	2021	1	1	3.99542	Computer, communication, and other electronic equipment manufacturing		24.1012	0.00375666	2.94444	0.699456	0.495673	2.3979	0.351479	0.125	350000	1	0.0507917	0.310128
002226	2017	1	1	3.80046	Chemical raw materials and chemical products manufacturing		22.3578	0.0231709	2.56495	0.843505	0.18776	2.07944	0.408451	0.428571	340000	0	0.0845097	0.318454
002226	2018	1	1	3.82188	Chemical raw materials and chemical products manufacturing		23.2116	0.0225146	2.63906	0.696889	0.393603	2.19722	0.449722	0.4	340000	0	0.11587	0.287657
002226	2019	1	1	3.84709	Chemical raw materials and chemical products manufacturing		23.2252	0.0417544	2.70805	0.697914	0.372731	2.19722	0.449722	0.4	340000	0	0.040634	0.287657
002226	2022	1	1	3.7974	Chemical raw materials and chemical products manufacturing		23.4912	0.0382235	2.89037	0.758801	0.326854	2.07944	0.431618	0.375	340000	1	0.233478	0.318454
002226	2023	1	1	3.77266	Chemical raw materials and chemical products manufacturing		23.5416	0.0579661	2.94444	0.728282	0.344265	2.07944	0.431618	0.333333	340000	1	0.192222	0.318454
002250	2011	4	1.465	3.40716	Chemical raw materials and chemical products manufacturing		21.7393	0.102244	2.3979	1.15847	0.29466	1.94591	0.424381	0.375	330000	0	0.0746244	0.356695
002250	2012	3	1.074	3.33947	Chemical raw materials and chemical products manufacturing		22.0711	0.0911791	2.48491	1.19329	0.368502	1.94591	0.423803	0.375	330000	0	0.10784	0.356695
002250	2013	6	1.468	3.36792	Chemical raw materials and chemical products manufacturing		22.2499	0.0940317	2.56495	1.14786	0.345096	1.94591	0.394749	0.5	330000	0	0.060006	0.356695
002250	2014	6	1.455	3.34895	Chemical raw materials and chemical products manufacturing		22.4806	0.0920263	2.63906	1.09002	0.335354	1.94591	0.374688	0.5	330000	0	0.0817448	0.356695
002250	2015	1	1	3.43956	Chemical raw materials and chemical products manufacturing		22.571	0.0967505	2.70805	1.17173	0.293404	1.79176	0.337004	0.5	330000	0	0.30764	0.405465
002250	2016	6	1.473	3.33579	Chemical raw materials and chemical products manufacturing		22.5152	0.043878	2.77259	1.09829	0.237277	1.94591	0.337483	0.5	330000	0	0.182865	0.356695
002250	2017	6	1.537	3.4344	Chemical raw materials and chemical products manufacturing		22.8811	0.0236996	2.83321	0.856325	0.298918	1.94591	0.314211	0.666667	330000	0	0.207639	0.356695
002250	2018	3	1.389	3.40491	Chemical raw materials and chemical products manufacturing		22.8779	0.00543652	2.89037	0.847084	0.289774	1.94591	0.319986	0.4	330000	0	0.115449	0.356695
002250	2019	5	1.352	3.42214	Chemical raw materials and chemical products manufacturing		22.9862	0.0201862	2.94444	1.097	0.321177	1.94591	0.320872	0.4	330000	0	0.0912209	0.356695
002250	2020	7	1.524	3.5043	Chemical raw materials and chemical products manufacturing		23.0659	0.012753	2.99573	1.26315	0.348536	1.94591	0.31837	0.166667	330000	0	0.145252	0.356695
002250	2021	6	1.458	3.46708	Chemical raw materials and chemical products manufacturing		23.2603	0.0252282	3.04452	1.03249	0.40503	1.94591	0.290873	0.2	330000	0	0.117024	0.356695
002250	2022	6	1.472	3.51057	Chemical raw materials and chemical products manufacturing		23.4319	0.0478844	3.09104	0.904399	0.418106	1.94591	0.323865	0.2	330000	0	0.0928214	0.356695
002250	2023	4	1.437	3.57431	Chemical raw materials and chemical products manufacturing		23.3557	-0.0313723	3.13549	0.68684	0.414776	1.94591	0.285386	0.2	330000	0	0.167897	0.356695
002258	2011	1	1	3.40612	Chemical raw materials and chemical products manufacturing		20.9734	0.0672008	1.60944	0.965703	0.110066	2.19722	0.515719	0.4	510000	1	0.0721814	0.287657
002258	2016	2	1.5	3.23786	Chemical raw materials and chemical products manufacturing		21.86	0.0692671	2.30259	1.21007	0.233677	2.19722	0.479338	0.285714	510000	1	0	0.287657
002258	2017	1	1	3.22132	Chemical raw materials and chemical products manufacturing		22.2306	0.0927292	2.3979	1.18244	0.324074	2.19722	0.454149	0.285714	510000	1	0	0.287657
002258	2018	1	1	3.23398	Chemical raw materials and chemical products manufacturing		22.6062	0.094505	2.48491	0.910758	0.364117	2.19722	0.429954	0.333333	510000	1	0	0.287657
002258	2019	2	1.5	3.22863	Chemical raw materials and chemical products manufacturing		22.7496	0.0496983	2.56495	0.89326	0.38408	2.19722	0.446422	0.4	510000	1	0	0.287657
002258	2020	1	1	3.22433	Chemical raw materials and chemical products manufacturing		22.859	0.076248	2.63906	1.00616	0.367107	2.19722	0.448324	0.4	510000	1	0.177858	0.287657
002258	2021	1	1	3.233	Chemical raw materials and chemical products manufacturing		23.0488	0.107622	2.70805	1.15105	0.358207	2.19722	0.408809	0.3	510000	1	0.168086	0.287657
002258	2022	1	1	3.22157	Chemical raw materials and chemical products manufacturing		23.2779	0.146163	2.77259	0.901805	0.298959	2.19722	0.387876	0.333333	510000	1	0.151221	0.287657
002258	2023	1	1	3.22559	Chemical raw materials and chemical products manufacturing		23.4198	0.0504464	2.83321	0.720817	0.343651	2.19722	0.370796	0.333333	510000	1	0.0285693	0.287657
002326	2011	1	1	3.33906	Chemical raw materials and chemical products manufacturing		21.2325	0.0375455	2.56495	0.911445	0.341231	2.07944	0.524455	0.25	330000	0	0	0.318454
002326	2012	1	1	3.40964	Chemical raw materials and chemical products manufacturing		21.2904	0.0357642	2.63906	0.944777	0.339005	1.94591	0.508549	0.166667	330000	0	0.0525607	0.356695
002326	2014	2	1.5	3.35109	Chemical raw materials and chemical products manufacturing		21.6468	0.0324289	2.77259	1.02396	0.27246	2.19722	0.424687	0.125	330000	0	0.111661	0.287657
002326	2015	2	1.5	3.32595	Chemical raw materials and chemical products manufacturing		21.9579	0.0408572	2.83321	1.58621	0.367299	2.19722	0.41976	0.125	330000	0	0.119665	0.287657
002326	2017	4	1.594	3.30068	Chemical raw materials and chemical products manufacturing		22.4921	0.0314142	2.94444	1.0037	0.421262	2.19722	0.412542	0.4	330000	0	0.051651	0.287657
002326	2018	3	1.389	3.23714	Chemical raw materials and chemical products manufacturing		22.6176	0.0628099	2.99573	0.812611	0.421556	2.19722	0.391772	0.5	330000	0	0.146326	0.287657
002326	2019	2	0.875	3.2657	Chemical raw materials and chemical products manufacturing		22.6499	0.0372449	3.04452	0.951313	0.412428	2.19722	0.348573	0.555556	330000	0	0.152902	0.287657
002326	2020	3	1.389	3.40192	Chemical raw materials and chemical products manufacturing		22.7704	0.00998102	3.09104	0.959559	0.439236	2.19722	0.301657	0.555556	330000	0	0.207536	0.287657
002326	2021	2	0.875	3.43746	Chemical raw materials and chemical products manufacturing		22.9979	0.0335923	3.13549	1.65905	0.479923	2.19722	0.331351	0.555556	330000	0	0.157634	0.287657
002326	2022	5	1.587	3.45818	Chemical raw materials and chemical products manufacturing		23.1529	0.0564677	3.17805	1.09891	0.512887	2.19722	0.288968	0.555556	330000	0	0.207306	0.287657
002326	2023	1	1	3.45851	Chemical raw materials and chemical products manufacturing		23.1573	-0.065545	3.21888	0.939436	0.532813	2.19722	0.270592	0.375	330000	0	0.213551	0.287657
002341	2014	1	1	3.72681	Chemical raw materials and chemical products manufacturing		21.9399	0.0264137	2.56495	1.05996	0.417712	1.94591	0.367437	0	440000	0	0.0635807	0.356695
002341	2015	1	1	3.74104	Chemical raw materials and chemical products manufacturing		22.014	-0.0336514	2.63906	1.06425	0.461139	1.94591	0.33172	0	440000	0	0.0236585	0.356695
002341	2017	1	1	3.63559	Chemical raw materials and chemical products manufacturing		22.5691	0.0112344	2.77259	1.10249	0.405101	1.94591	0.360246	0.111111	440000	0	0.0188365	0.356695
002341	2019	1	1	3.77	Chemical raw materials and chemical products manufacturing		22.9812	-0.000114259	2.89037	0.755903	0.397317	2.19722	0.333784	0.142857	440000	0	0.132931	0.287657
002341	2020	1	1	3.728	Chemical raw materials and chemical products manufacturing		22.7708	-0.184128	2.94444	0.715691	0.427288	2.19722	0.312338	0.1	440000	0	0.0944692	0.287657
002341	2021	1	1	3.74554	Chemical raw materials and chemical products manufacturing		22.5596	-0.227519	2.99573	0.92579	0.481849	2.19722	0.291242	0	440000	0	0.100598	0.287657
002360	2011	1	1	3.40659	Chemical raw materials and chemical products manufacturing		20.3401	0.0833694	1.79176	0.946213	0.0875194	2.3979	0.364342	0	140000	0	0.105218	0.310128
002386	2011	1	1	3.33779	Chemical raw materials and chemical products manufacturing		23.2043	0.00268661	2.89037	0.69433	0.498414	2.3979	0.507848	0.2	510000	1	0.0744946	0.310128
002386	2013	1	1	3.58786	Chemical raw materials and chemical products manufacturing		23.3636	0.00385406	2.99573	0.660776	0.523832	2.3979	0.507848	0.222222	510000	1	0.141418	0.310128
002386	2014	2	1.5	3.44083	Chemical raw materials and chemical products manufacturing		23.4378	0.00257382	3.04452	0.697046	0.536335	2.3979	0.459118	0.222222	510000	1	0.13258	0.310128
002386	2015	1	1	3.53537	Chemical raw materials and chemical products manufacturing		23.3237	-0.000679911	3.09104	0.728019	0.516148	2.3979	0.365586	0.2	510000	1	0.108175	0.310128
002386	2016	2	1.5	3.48327	Chemical raw materials and chemical products manufacturing		23.3785	0.00216273	3.13549	0.749966	0.525116	2.3979	0.338151	0.222222	510000	1	0.0663373	0.310128
002386	2019	4	1.75	3.61993	Chemical raw materials and chemical products manufacturing		23.346	0.00169432	3.2581	0.674764	0.489743	2.3979	0.345802	0.222222	510000	1	0.0823002	0.310128
002386	2020	4	1.75	3.81393	Chemical raw materials and chemical products manufacturing		23.4146	0.00722777	3.29584	0.671421	0.497221	2.3979	0.335598	0.222222	510000	1	0.488897	0.310128
002386	2021	3	1.667	3.75868	Chemical raw materials and chemical products manufacturing		23.4896	0.040003	3.3322	0.814041	0.489768	2.30259	0.254083	0.272727	510000	1	0.227135	0.336472
002386	2022	6	1.641	3.72798	Chemical raw materials and chemical products manufacturing		23.4599	0.0329321	3.3673	0.712619	0.466708	2.3979	0.249762	0.272727	510000	1	0.375762	0.310128
002386	2023	4	1.594	3.72528	Chemical raw materials and chemical products manufacturing		23.6296	0.000588579	3.4012	0.656653	0.43967	2.30259	0.288462	0.0909091	510000	1	0.245239	0.287657
002407	2013	1	1	3.43267	Chemical raw materials and chemical products manufacturing		21.7213	0.00603317	2.70805	0.890247	0.334146	2.19722	0.2819	0.142857	410000	0	0.0733197	0.287657
002407	2014	1	1	3.34723	Chemical raw materials and chemical products manufacturing		21.8751	0.00242998	2.77259	0.939497	0.389861	2.19722	0.239939	0.25	410000	0	0.0651696	0.287657
002407	2018	1	1	3.60642	Chemical raw materials and chemical products manufacturing		22.8223	0.0160131	2.99573	0.853902	0.410416	2.19722	0.186076	0.375	410000	0	0.0187342	0.287657
002407	2023	3	1.667	3.80191	Chemical raw materials and chemical products manufacturing		23.8498	0.0277232	3.21888	0.800234	0.394613	2.19722	0.151298	0.181818	410000	0	0.0679494	0.287657
002408	2018	1	1	3.25137	Chemical raw materials and chemical products manufacturing		23.167	0.0707964	2.48491	0.87529	0.302529	2.19722	0.473351	0.428571	370000	0	0	0.287657
002408	2019	1	1	3.31778	Chemical raw materials and chemical products manufacturing		23.3716	0.0437227	2.56495	0.837627	0.350644	2.19722	0.495225	0.285714	370000	0	0	0.287657
002409	2011	1	1	3.40828	Chemical raw materials and chemical products manufacturing		20.9836	0.0545024	2.70805	0.826402	0.121321	1.94591	0.545447	0.5	320000	0	0	0.356695
002409	2012	2	1.5	3.34636	Chemical raw materials and chemical products manufacturing		20.9933	0.0615192	2.77259	0.820919	0.0853401	1.94591	0.539715	0.5	320000	0	0.0909925	0.356695
002409	2013	2	0.875	3.43836	Chemical raw materials and chemical products manufacturing		21.0514	0.0551238	2.83321	0.923756	0.0963298	1.94591	0.532212	0.4	320000	0	0.0544945	0.356695
002409	2014	1	1	3.35291	Chemical raw materials and chemical products manufacturing		21.2475	0.0350619	2.89037	0.954443	0.217651	1.94591	0.532276	0.4	320000	0	0.0878142	0.356695
002409	2015	2	0.875	3.39493	Chemical raw materials and chemical products manufacturing		21.2597	0.0514523	2.94444	1.13065	0.191157	1.94591	0.530791	0.4	320000	0	0.182255	0.356695
002409	2019	2	0.875	3.32096	Chemical raw materials and chemical products manufacturing		22.3467	0.0597947	3.13549	0.955783	0.0982931	2.19722	0.477522	0.4	320000	0	0.120795	0.287657
002409	2022	1	1	3.55457	Chemical raw materials and chemical products manufacturing		23.0838	0.0501654	3.2581	1.09873	0.208933	2.07944	0.413426	0.5	320000	0	0.0247507	0.318454
002409	2023	1	1	3.61038	Chemical raw materials and chemical products manufacturing		23.2581	0.0464775	3.29584	1.08094	0.272297	2.19722	0.406032	0.5	320000	0	0.0305951	0.367694
002411	2012	1	1	3.63376	Chemical raw materials and chemical products manufacturing		20.9049	0.0510174	2.3979	0.977448	0.250684	2.19722	0.327663	0.285714	320000	0	0	0.287657
002411	2014	1	1	3.62441	Chemical raw materials and chemical products manufacturing		21.169	0.0190581	2.56495	1.18707	0.35795	2.19722	0.258566	0.222222	320000	0	0.041929	0.287657
002411	2018	1	1	3.83608	Pharmaceutical manufacturing		23.7491	0.0204547	2.83321	0.792463	0.428539	2.07944	0.556437	0.125	610000	0	0.0313407	0.318454
002411	2019	1	1	3.80152	Pharmaceutical manufacturing		23.8479	0.0165043	2.89037	0.939325	0.436321	2.07944	0.493231	0.125	610000	0	0	0.318454
002411	2020	1	1	3.85024	Pharmaceutical manufacturing		23.6786	-0.0574735	2.94444	0.667755	0.428545	2.07944	0.481555	0.1	610000	0	0	0.318454
002440	2016	1	1	3.51992	Chemical raw materials and chemical products manufacturing		22.7824	0.08189	2.56495	0.945078	0.157906	2.19722	0.394361	0.166667	330000	0	0.204374	0.287657
002440	2020	2	1.5	3.55322	Chemical raw materials and chemical products manufacturing		23.1529	0.0644482	2.83321	0.742082	0.163301	2.19722	0.380874	0.125	330000	0	0.409914	0.287657
002440	2021	2	0.875	3.48481	Chemical raw materials and chemical products manufacturing		23.1596	0.0677008	2.89037	0.744417	0.149359	2.19722	0.387878	0.125	330000	0	0.293142	0.287657
002440	2022	4	1.75	3.48399	Chemical raw materials and chemical products manufacturing		23.2609	0.0486294	2.94444	0.642119	0.200287	2.19722	0.363519	0.125	330000	0	0.446791	0.287657
002440	2023	4	1.75	3.47179	Chemical raw materials and chemical products manufacturing		23.1889	0.0056078	2.99573	0.594981	0.165035	2.19722	0.362176	0.111111	330000	0	0.298095	0.287657
002442	2020	1	1	3.30204	Chemical raw materials and chemical products manufacturing		21.6464	0.030308	2.56495	0.84147	0.390491	2.19722	0.369649	0.428571	130000	0	0.104008	0.287657
002469	2020	1	1	3.39812	Chemical raw materials and chemical products manufacturing		21.8235	0.116657	3.29584	0.839525	0.185899	1.94591	0.244946	0.25	370000	0	0.211796	0.356695
002470	2014	1	1	3.70627	Chemical raw materials and chemical products manufacturing		23.1222	0.0768925	2.83321	1.08727	0.311293	2.19722	0.510807	0.454545	370000	0	0.0918709	0.367694
002470	2015	6	1.582	3.6666	Chemical raw materials and chemical products manufacturing		23.1733	0.0791186	2.89037	1.32989	0.272003	2.19722	0.500134	0.4	370000	0	0.10798	0.367694
002470	2016	5	1.549	3.65461	Chemical raw materials and chemical products manufacturing		23.3462	-0.0146521	2.94444	1.10735	0.325772	2.19722	0.496344	0.4	370000	0	0	0.367694
002470	2017	9	1.668	3.72747	Chemical raw materials and chemical products manufacturing		23.6148	0.0184372	2.99573	0.929591	0.364393	2.07944	0.49394	0.363636	370000	0	0	0.318454
002470	2018	6	1.526	3.77226	Chemical raw materials and chemical products manufacturing		23.807	0.0197548	3.04452	0.866252	0.409071	2.19722	0.483545	0.363636	370000	0	0.0936137	0.367694
002470	2019	11	1.681	3.80021	Chemical raw materials and chemical products manufacturing		23.7643	-0.0441633	3.09104	0.669839	0.424576	2.19722	0.451377	0.363636	370000	0	0.107573	0.367694
002497	2011	1	1	3.33771	Chemical raw materials and chemical products manufacturing		21.4371	0.0937969	2.3979	0.818535	0.0710873	2.19722	0.279472	0.25	510000	0	0.2057	0.287657
002497	2012	1	1	3.33719	Chemical raw materials and chemical products manufacturing		21.6533	0.0849728	2.48491	0.806053	0.168648	2.19722	0.279472	0.222222	510000	0	0.0635942	0.287657
002497	2013	1	1	3.53394	Chemical raw materials and chemical products manufacturing		21.7522	0.0841028	2.56495	0.922739	0.180352	2.19722	0.277956	0.125	510000	0	0.0522039	0.287657
002497	2014	1	1	3.44114	Chemical raw materials and chemical products manufacturing		21.7917	0.0820571	2.63906	1.065	0.172214	2.19722	0.252568	0.111111	510000	0	0.0975194	0.287657
002497	2015	1	1	3.51914	Chemical raw materials and chemical products manufacturing		21.7857	0.0432228	2.70805	1.27788	0.159153	2.19722	0.224511	0.230769	510000	0	0.135986	0.287657
002497	2016	1	1	3.69205	Chemical raw materials and chemical products manufacturing		21.8989	0.0445833	2.77259	1.10981	0.183045	2.19722	0.222746	0.25	510000	0	0.0942316	0.287657
002497	2017	1	1	3.74538	Chemical raw materials and chemical products manufacturing		22.1917	0.0599381	2.83321	1.37321	0.298821	2.19722	0.205361	0.25	510000	0	0.041209	0.287657
002497	2018	2	0.875	3.69901	Chemical raw materials and chemical products manufacturing		22.2794	0.0471487	2.89037	0.966747	0.314197	2.19722	0.201164	0.272727	510000	0	0.0201295	0.287657
002497	2019	1	1	3.68842	Chemical raw materials and chemical products manufacturing		22.3754	0.0145978	2.94444	1.00273	0.332817	2.19722	0.201409	0.25	510000	0	0.0500104	0.287657
002497	2020	1	1	3.68047	Chemical raw materials and chemical products manufacturing		22.663	0.0483347	2.99573	1.42935	0.196926	2.19722	0.192552	0.25	510000	0	0.242975	0.287657
002497	2021	1	1	3.7326	Chemical raw materials and chemical products manufacturing		22.9285	0.102952	3.04452	1.53305	0.230081	2.19722	0.18556	0.272727	510000	0	0.0123169	0.287657
002497	2022	1	1	3.73831	Chemical raw materials and chemical products manufacturing		23.4074	0.200769	3.09104	1.08102	0.204188	2.19722	0.17479	0.230769	510000	0	0.0217376	0.287657
002538	2019	1	1	3.77859	Chemical raw materials and chemical products manufacturing		22.4419	0.0439376	3.13549	0.648846	0.260803	2.19722	0.354363	0	340000	0	0.0841256	0.287657
002538	2021	1	1	3.85657	Chemical raw materials and chemical products manufacturing		22.7371	0.0593914	3.21888	0.911624	0.283275	2.19722	0.313959	0.125	340000	0	0.0994525	0.287657
002538	2022	1	1	3.91308	Chemical raw materials and chemical products manufacturing		22.6611	0.0736337	3.2581	0.792878	0.207034	2.19722	0.308926	0.2	340000	0	0.100206	0.287657
002539	2011	1	1	3.34282	Chemical raw materials and chemical products manufacturing		22.2143	0.0540848	2.83321	0.724976	0.388329	2.19722	0.545179	0.125	510000	0	0	0.287657
002539	2023	1	1	3.66322	Chemical raw materials and chemical products manufacturing		23.7436	0.0417103	3.3673	0.721625	0.465595	1.94591	0.328561	0.166667	510000	0	0.0703258	0.356695
002588	2012	2	1.5	3.62462	Chemical raw materials and chemical products manufacturing		22.1251	0.0693417	2.70805	0.804661	0.359785	1.60944	0.420429	0	370000	0	0.143347	0.336472
002588	2013	1	1	3.80292	Chemical raw materials and chemical products manufacturing		22.1804	0.0884762	2.77259	0.880246	0.320356	1.60944	0.420429	0	370000	0	0	0.336472
002588	2019	1	1	3.72414	Chemical raw materials and chemical products manufacturing		22.6097	0.0156236	3.09104	0.69307	0.273039	1.60944	0.412001	0	370000	0	0.212379	0.336472
002588	2021	2	0.875	3.68958	Chemical raw materials and chemical products manufacturing		22.7993	0.0505593	3.17805	0.763528	0.299105	1.60944	0.409298	0	370000	0	0.132586	0.336472
002588	2022	2	1.5	3.71584	Chemical raw materials and chemical products manufacturing		23.0593	0.0429834	3.21888	0.72255	0.349189	1.60944	0.409298	0.222222	370000	0	0.119378	0.336472
002588	2023	2	1.5	3.72414	Chemical raw materials and chemical products manufacturing		23.2713	0.0549834	3.2581	0.702398	0.367114	1.60944	0.409298	0.25	370000	0	0.146415	0.336472
002591	2012	1	1	3.31111	Chemical raw materials and chemical products manufacturing		20.5148	0.0308599	2.94444	0.756216	0.108055	2.19722	0.518794	0.166667	360000	0	0.076764	0.367694
002591	2021	3	1.667	3.71798	Chemical raw materials and chemical products manufacturing		20.8214	0.0157475	3.3322	0.957944	0.253726	1.94591	0.362131	0.166667	360000	0	0.0120194	0.356695
002591	2023	2	1.5	3.63942	Chemical raw materials and chemical products manufacturing		20.7388	-0.0415928	3.4012	1.12074	0.287027	1.94591	0.317825	0.2	360000	0	0.108816	0.356695
002597	2017	1	1	3.22001	Chemical raw materials and chemical products manufacturing		22.4591	0.168944	2.48491	1.37458	0.330837	2.19722	0.387866	0.142857	340000	0	0.0921887	0.287657
002597	2018	1	1	3.30818	Chemical raw materials and chemical products manufacturing		22.4628	0.148486	2.56495	1.05203	0.271287	2.19722	0.412395	0.142857	340000	0	0.0860561	0.287657
002597	2019	1	1	3.25241	Chemical raw materials and chemical products manufacturing		22.5396	0.123504	2.63906	1.20042	0.239894	2.19722	0.415503	0.2	340000	0	0.0777241	0.287657
002597	2020	1	1	3.22242	Food manufacturing		22.6689	0.0977373	2.70805	1.35751	0.257042	2.19722	0.422099	0.2	340000	0	0.17082	0.287657
002597	2021	1	1	3.28522	Food manufacturing		22.9034	0.124838	2.77259	1.52357	0.292539	2.19722	0.424806	0.2	340000	0	0.283315	0.287657
002597	2023	1	1	3.22813	Food manufacturing		22.9967	0.0699994	2.89037	0.934872	0.234845	2.19722	0.395601	0.222222	340000	0	0.212234	0.287657
002601	2018	1	1	3.32006	Chemical raw materials and chemical products manufacturing		23.7641	0.105162	3.04452	0.790772	0.333744	2.48491	0.471706	0.333333	410000	0	0.270387	0.287657
002601	2019	1	1	3.39772	Chemical raw materials and chemical products manufacturing		23.9792	0.09567	3.09104	0.904184	0.376776	2.48491	0.443721	0.25	410000	0	0.306835	0.287657
002601	2020	2	1.5	3.61395	Chemical raw materials and chemical products manufacturing		24.2721	0.0648036	3.13549	1.09717	0.434715	2.48491	0.385473	0.166667	410000	0	0.167105	0.287657
002601	2021	3	1.389	3.5964	Chemical raw materials and chemical products manufacturing		24.5373	0.0993589	3.17805	0.981111	0.43269	2.48491	0.402463	0.142857	410000	0	0	0.287657
002601	2022	3	1.389	3.62098	Chemical raw materials and chemical products manufacturing		24.804	0.0580404	3.21888	0.814227	0.474296	2.48491	0.384139	0.333333	410000	0	0.0204339	0.287657
002601	2023	5	1.618	3.73219	Chemical raw materials and chemical products manufacturing		24.8793	0.0496125	3.2581	0.807264	0.47491	2.19722	0.37382	0.5	410000	0	0.0973124	0.287657
002632	2022	1	1	3.59763	Chemical raw materials and chemical products manufacturing		21.7533	0.106205	2.77259	0.937076	0.151752	2.07944	0.431228	0	330000	0	0.200246	0.318454
002632	2023	2	0.875	3.63718	Chemical raw materials and chemical products manufacturing		21.6844	0.0580221	2.83321	1.22512	0.14006	2.19722	0.431228	0.166667	330000	0	0.0950608	0.287657
002637	2012	2	1.5	3.41376	Chemical raw materials and chemical products manufacturing		21.2153	0.00546108	2.56495	0.798257	0.318916	1.94591	0.290606	0.666667	330000	0	0.053204	0.356695
002637	2013	1	1	3.37437	Chemical raw materials and chemical products manufacturing		21.1994	0.0363405	2.63906	0.932842	0.287182	1.94591	0.289488	0.75	330000	0	0.0317185	0.356695
002637	2014	2	1.5	3.35659	Chemical raw materials and chemical products manufacturing		21.2923	0.0324064	2.70805	0.954876	0.316062	1.94591	0.268875	0.75	330000	0	0.0779008	0.356695
002637	2015	2	1.5	3.32885	Chemical raw materials and chemical products manufacturing		21.4959	0.00829677	2.77259	1.12989	0.362455	1.94591	0.287973	0.75	330000	0	0.134322	0.356695
002637	2016	2	1.5	3.24411	Chemical raw materials and chemical products manufacturing		22.3039	0.0389938	2.83321	0.864168	0.387353	1.94591	0.352137	0.714286	330000	0	0	0.356695
002637	2017	2	1.5	3.23167	Chemical raw materials and chemical products manufacturing		22.5748	0.0244743	2.89037	0.777838	0.452145	1.94591	0.344041	0.714286	330000	0	0.15458	0.356695
002637	2018	3	1.667	3.24507	Chemical raw materials and chemical products manufacturing		22.6708	0.0293042	2.94444	0.699756	0.464039	2.19722	0.346413	0.666667	330000	0	0.105153	0.287657
002637	2019	3	1.667	3.27121	Chemical raw materials and chemical products manufacturing		22.6223	0.0566732	2.99573	0.772323	0.418172	2.19722	0.342976	0.666667	330000	0	0.0289917	0.287657
002637	2020	4	1.417	3.33985	Chemical raw materials and chemical products manufacturing		22.6999	0.048458	3.04452	0.807618	0.423838	2.07944	0.307553	0.625	330000	0	0.0275158	0.318454
002637	2021	7	1.65	3.39152	Chemical raw materials and chemical products manufacturing		22.8538	0.0912678	3.09104	0.896342	0.392712	2.19722	0.34807	0.571429	330000	0	0.0728578	0.287657
002637	2022	4	1.358	3.33339	Chemical raw materials and chemical products manufacturing		22.7603	-0.0174775	3.13549	0.801876	0.418835	2.19722	0.350874	0.714286	330000	0	0.301898	0.287657
002637	2023	5	1.509	3.35359	Chemical raw materials and chemical products manufacturing		22.7847	0.00578093	3.17805	0.7596	0.419631	2.19722	0.365645	0.666667	330000	0	0.131287	0.287657
002669	2021	1	1	3.41659	Chemical raw materials and chemical products manufacturing		22.0392	0.00573408	3.52636	0.911808	0.326031	2.19722	0.277054	0.125	310000	1	0.0862138	0.287657
002741	2015	1	1	3.60847	Chemical raw materials and chemical products manufacturing		20.6182	0.0623867	3.49651	1.62816	0.174445	2.19722	0.479077	0.4	440000	0	0	0.287657
002741	2017	1	1	3.53547	Chemical raw materials and chemical products manufacturing		21.1795	0.056441	3.55535	1.1445	0.256014	2.19722	0.462019	0.2	440000	0	0.101869	0.287657
002741	2018	2	1.5	3.54113	Chemical raw materials and chemical products manufacturing		21.6283	0.0517004	3.58352	1.13727	0.395193	2.19722	0.462019	0.25	440000	0	0.0595414	0.287657
002741	2019	2	1.5	3.50695	Chemical raw materials and chemical products manufacturing		21.6764	0.00345245	3.61092	1.02233	0.416116	2.19722	0.462014	0.25	440000	0	0.0856835	0.287657
002741	2020	7	1.806	3.6034	Chemical raw materials and chemical products manufacturing		21.7315	0.0127988	3.61092	1.11588	0.424577	2.19722	0.429989	0.25	440000	0	0.0392053	0.287657
002741	2021	5	1.478	3.52981	Chemical raw materials and chemical products manufacturing		21.8324	0.0203052	3.63759	1.35868	0.390705	2.19722	0.412873	0.25	440000	0	0.0231171	0.287657
002741	2022	5	1.518	3.5309	Chemical raw materials and chemical products manufacturing		22.0393	0.0301363	3.66356	1.1723	0.422077	2.19722	0.395552	0.25	440000	0	0.194884	0.287657
002741	2023	4	1.594	3.52512	Computer, communication, and other electronic equipment manufacturing		21.8995	-0.142621	3.68888	1.18838	0.46005	2.19722	0.394606	0.333333	440000	0	0.0523748	0.287657
002810	2016	1	1	3.28635	Chemical raw materials and chemical products manufacturing		20.6258	0.0502771	3.21888	1.13517	0.262309	1.94591	0.372103	0.285714	370000	0	0.207697	0.356695
002827	2023	1	1	3.57188	Chemical raw materials and chemical products manufacturing		21.6893	0.0454512	2.83321	1.21085	0.468058	2.19722	0.491652	0	540000	1	0.0248614	0.287657
002915	2017	1	1	3.30056	Chemical raw materials and chemical products manufacturing		20.3455	0.0663837	2.89037	1.18544	0.291124	2.19722	0.47132	0.5	330000	0	0	0.287657
002915	2018	1	1	3.31281	Chemical raw materials and chemical products manufacturing		20.378	0.0498066	2.94444	1.05065	0.286499	2.19722	0.47132	0.5	330000	0	0	0.287657
002915	2022	2	1.5	3.386	Chemical raw materials and chemical products manufacturing		21.8243	0.0604864	3.13549	1.18914	0.29984	2.3979	0.376106	0.4	330000	0	0.023525	0.310128
002915	2023	5	1.702	3.50468	Chemical raw materials and chemical products manufacturing		21.8836	-0.0554602	3.17805	1.15486	0.378655	2.3979	0.360614	0.4	330000	0	0.0423209	0.310128
002917	2023	1	1	3.95609	Chemical raw materials and chemical products manufacturing		21.8763	0.033167	3.4012	0.874793	0.368529	2.07944	0.413482	0.2	440000	0	0.0469643	0.318454
002971	2022	1	1	3.25855	Chemical raw materials and chemical products manufacturing		21.8016	0.0252475	2.99573	0.865934	0.4634	2.19722	0.438981	0	420000	0	0.0295268	0.287657
002971	2023	1	1	3.331	Chemical raw materials and chemical products manufacturing		22.128	0.0203529	3.04452	0.955076	0.519157	2.19722	0.38954	0	420000	0	0.131243	0.287657
003017	2022	1	1	3.29497	Chemical raw materials and chemical products manufacturing		21.134	0.0521496	2.99573	0.840475	0.297711	2.19722	0.223341	0.285714	330000	0	0.179113	0.287657
003017	2023	1	1	3.37733	Chemical raw materials and chemical products manufacturing		21.1594	0.0318201	3.04452	0.930097	0.298729	2.19722	0.208976	0.25	330000	0	0.128326	0.287657
300019	2015	2	1.5	3.86271	Chemical raw materials and chemical products manufacturing		20.6166	0.0947052	2.89037	1.62764	0.233727	2.19722	0.447479	0.5	510000	0	0.0616148	0.287657
300019	2016	2	1.5	3.82139	Chemical raw materials and chemical products manufacturing		20.6431	0.0938694	2.94444	1.54334	0.190051	2.07944	0.423434	0.5	510000	0	0.0263242	0.318454
300019	2017	3	1.667	3.69799	Chemical raw materials and chemical products manufacturing		20.7008	0.0514149	2.99573	1.42357	0.210698	2.19722	0.440872	0.4	510000	0	0.123214	0.287657
300019	2018	1	1	3.67523	Chemical raw materials and chemical products manufacturing		20.7403	0.0620764	3.04452	1.09186	0.225781	2.19722	0.43532	0.4	510000	0	0.195309	0.287657
300019	2019	1	1	3.79335	Chemical raw materials and chemical products manufacturing		20.8602	0.108648	3.09104	1.32532	0.200111	2.19722	0.436997	0.5	510000	0	0.225397	0.287657
300019	2020	1	1	3.82191	Chemical raw materials and chemical products manufacturing		21.3123	0.105758	3.13549	1.41747	0.349243	2.19722	0.428111	0.571429	510000	0	0.185623	0.287657
300019	2021	1	1	3.82282	Chemical raw materials and chemical products manufacturing		21.8096	0.0864784	3.17805	1.30023	0.260471	2.19722	0.36378	0.571429	510000	0	0.0443827	0.287657
300019	2022	2	1.5	3.71935	Chemical raw materials and chemical products manufacturing		21.7597	0.0850704	3.21888	1.16078	0.191254	2.19722	0.363944	0.571429	510000	0	0.0986507	0.287657
300019	2023	2	1.5	3.81885	Chemical raw materials and chemical products manufacturing		21.8928	0.0933631	3.2581	1.13017	0.217367	2.19722	0.363964	0.444444	510000	0	0.0870796	0.287657
300037	2013	1	1	3.383	Chemical raw materials and chemical products manufacturing		21.0928	0.0831521	2.48491	1.00393	0.126552	2.19722	0.40795	0.571429	440000	0	0.026905	0.287657
300037	2015	1	1	3.61718	Chemical raw materials and chemical products manufacturing		21.5606	0.0560122	2.63906	1.44506	0.129796	2.19722	0.369366	0.555556	440000	0	0	0.287657
300037	2017	1	1	3.59449	Chemical raw materials and chemical products manufacturing		22.0314	0.0746063	2.77259	1.05653	0.289474	2.19722	0.341129	0.444444	440000	0	0.14853	0.287657
300037	2018	1	1	3.68532	Chemical raw materials and chemical products manufacturing		22.2071	0.0720345	2.83321	1.07155	0.303195	2.19722	0.340371	0.555556	440000	0	0.171385	0.287657
300037	2019	2	1.5	3.65101	Chemical raw materials and chemical products manufacturing		22.3224	0.0644399	2.89037	1.2204	0.280593	2.19722	0.333483	0.555556	440000	0	0.163913	0.287657
300037	2020	2	1.5	3.70641	Chemical raw materials and chemical products manufacturing		22.7242	0.0684287	2.94444	1.71414	0.267149	2.19722	0.311151	0.555556	440000	0	0.236871	0.287657
300037	2021	1	1	3.80236	Chemical raw materials and chemical products manufacturing		23.1361	0.115291	2.99573	1.51369	0.317442	2.19722	0.347984	0.5	440000	0	0.108708	0.287657
300037	2022	1	1	3.76752	Chemical raw materials and chemical products manufacturing		23.4573	0.111897	3.04452	1.1326	0.359023	2.19722	0.311584	0.5	440000	0	0.1197	0.287657
300037	2023	3	1.667	3.78523	Computer, communication, and other electronic equipment manufacturing		23.5925	0.0557613	3.09104	1.11853	0.373953	2.19722	0.307507	0.444444	440000	0	0.137693	0.287657
300055	2023	1	1	3.67477	Chemical raw materials and chemical products manufacturing		22.6981	-0.0261451	3.2581	0.67692	0.215383	1.94591	0.347495	0.4	110000	0	0.0248029	0.356695
300063	2011	1	1	3.40568	Chemical raw materials and chemical products manufacturing		20.354	0.0279818	2.3979	0.771471	0.071118	2.19722	0.541788	0.4	440000	0	0.0218827	0.287657
300067	2013	2	1.5	3.37394	Chemical raw materials and chemical products manufacturing		20.6069	0.0529764	1.79176	0.938041	0.0960257	2.19722	0.480897	0.571429	310000	0	0	0.287657
300067	2014	3	1.667	3.28226	Chemical raw materials and chemical products manufacturing		20.7498	0.0973797	1.94591	1.16917	0.120428	1.94591	0.46402	0.4	310000	0	0	0.356695
300067	2015	2	1.5	3.39809	Chemical raw materials and chemical products manufacturing		21.0399	0.0437403	2.07944	1.42007	0.25649	1.79176	0.457289	0.4	310000	0	0.120301	0.405465
300067	2016	4	1.437	3.2419	Chemical raw materials and chemical products manufacturing		21.0903	0.0544443	2.19722	1.28841	0.231811	1.79176	0.442517	0.5	310000	0	0	0.405465
300067	2017	4	1.234	3.301	Chemical raw materials and chemical products manufacturing		21.2994	0.0459386	2.30259	1.07357	0.111718	1.94591	0.438309	0.4	310000	0	0.101693	0.356695
300067	2019	8	1.611	3.55879	Chemical raw materials and chemical products manufacturing		21.4316	0.0765303	2.48491	1.02464	0.146983	1.94591	0.394441	0.4	310000	0	0.03635	0.356695
300067	2020	6	1.44	3.58606	Chemical raw materials and chemical products manufacturing		21.5693	0.0490332	2.56495	0.997756	0.220983	1.94591	0.374231	0.333333	310000	0	0.0701222	0.356695
300067	2021	3	1.389	3.53072	Chemical raw materials and chemical products manufacturing		21.719	0.0384302	2.63906	0.963262	0.138537	1.94591	0.356416	0.333333	310000	0	0.0122927	0.356695
300067	2022	1	1	3.55532	Chemical raw materials and chemical products manufacturing		21.8036	0.0121421	2.70805	0.788888	0.182	1.94591	0.340785	0.333333	310000	0	0.0759584	0.356695
300072	2011	3	1.667	3.41214	Chemical raw materials and chemical products manufacturing		21.3663	0.0487643	2.70805	0.897886	0.336346	2.3979	0.409681	0.4	110000	0	0.027649	0.310128
300072	2012	3	1.667	3.34598	Chemical raw materials and chemical products manufacturing		21.6142	0.0712772	2.77259	0.996119	0.368199	2.3979	0.426916	0.5	110000	0	0.0144637	0.310128
300072	2014	3	1.389	3.35562	Chemical raw materials and chemical products manufacturing		22.3873	0.0749788	2.89037	1.31982	0.472493	2.3979	0.417709	0.5	110000	0	0	0.310128
300072	2015	1	1	3.32974	Chemical raw materials and chemical products manufacturing		23.0487	0.0765895	2.94444	1.28564	0.421715	2.3979	0.422262	0.555556	110000	0	0	0.310128
300072	2016	3	1.667	3.24304	Chemical raw materials and chemical products manufacturing		23.6416	0.0846247	2.99573	1.37982	0.499142	2.3979	0.409193	0.444444	110000	0	0	0.310128
300072	2017	4	1.75	3.45086	Chemical raw materials and chemical products manufacturing		23.9595	0.0992393	3.04452	1.27613	0.46147	2.3979	0.406639	0.666667	110000	0	0	0.310128
300072	2018	3	1.667	3.29808	Chemical raw materials and chemical products manufacturing		23.9586	0.0228833	3.09104	0.887826	0.447416	2.3979	0.414361	0.666667	110000	1	0.0328707	0.310128
300072	2019	7	1.806	3.32204	Chemical raw materials and chemical products manufacturing		23.7846	0.00560951	3.13549	0.764991	0.384522	2.3979	0.411208	0.666667	110000	1	0.0638107	0.310128
300072	2021	3	1.389	3.40402	Chemical raw materials and chemical products manufacturing		23.4159	0.00386924	3.21888	0.97666	0.336231	2.3979	0.355837	0.6	110000	1	0.0553162	0.310128
300109	2011	1	1	3.40659	Chemical raw materials and chemical products manufacturing		19.781	0.0619819	2.19722	1.18251	0.0949152	1.94591	0.389788	0.142857	410000	0	0	0.356695
300109	2019	1	1	3.64709	Chemical raw materials and chemical products manufacturing		22.1576	0.0295231	2.83321	0.784074	0.241077	1.79176	0.347715	0.125	410000	0	0.0135909	0.405465
300109	2021	1	1	3.78031	Chemical raw materials and chemical products manufacturing		22.107	0.0680341	2.94444	1.04095	0.13786	2.19722	0.262017	0.125	410000	0	0	0.287657
300121	2018	1	1	3.263	Chemical raw materials and chemical products manufacturing		21.4656	0.161111	2.94444	0.984996	0.172151	1.79176	0.453768	0.25	370000	0	0.0256293	0.405465
300121	2019	2	1.5	3.25814	Chemical raw materials and chemical products manufacturing		21.4809	0.0828854	2.99573	0.902249	0.195594	1.94591	0.406134	0.333333	370000	0	0	0.356695
300121	2022	1	1	3.39266	Chemical raw materials and chemical products manufacturing		21.9877	0.135871	3.13549	0.859211	0.194881	1.94591	0.344428	0.285714	370000	0	0.0584392	0.356695
300121	2023	1	1	3.48477	Chemical raw materials and chemical products manufacturing		22.2088	0.0666192	3.17805	0.73838	0.241986	1.94591	0.33319	0.142857	370000	0	0.0681463	0.356695
300132	2016	1	1	3.32889	Chemical raw materials and chemical products manufacturing		20.3883	0.0447454	2.77259	1.71265	0.106954	2.19722	0.345973	0.2	350000	0	0.282998	0.287657
300132	2017	1	1	3.30355	Chemical raw materials and chemical products manufacturing		20.6734	0.0949334	2.83321	1.37472	0.210899	1.79176	0.365154	0.2	350000	0	0.281851	0.405465
300132	2018	1	1	3.2385	Chemical raw materials and chemical products manufacturing		21.1049	0.185709	2.89037	1.35714	0.216916	2.19722	0.349787	0	350000	0	0.158631	0.287657
300135	2014	1	1	3.35157	Chemical raw materials and chemical products manufacturing		21.5843	0.0263237	2.56495	1.02875	0.408293	2.19722	0.384588	0	320000	0	0	0.287657
300135	2015	1	1	3.32556	Chemical raw materials and chemical products manufacturing		21.7506	0.00837666	2.63906	1.36664	0.459645	2.07944	0.307802	0	320000	0	0.133997	0.318454
300135	2016	1	1	3.23773	Chemical raw materials and chemical products manufacturing		21.7888	0.0086853	2.70805	1.14713	0.464274	2.19722	0.312118	0	320000	0	0.22435	0.287657
300135	2018	1	1	3.2543	Chemical raw materials and chemical products manufacturing		21.8075	0.0136343	2.83321	0.879973	0.458609	2.19722	0.310329	0.2	320000	0	0.148053	0.287657
300200	2021	1	1	3.4551	Chemical raw materials and chemical products manufacturing		21.4876	0.0715032	3.13549	1.09348	0.14248	1.94591	0.34018	0.166667	110000	0	0	0.356695
300200	2022	1	1	3.51083	Chemical raw materials and chemical products manufacturing		21.5637	0.057769	3.17805	0.886173	0.138854	1.94591	0.340203	0.166667	110000	0	0.00998311	0.356695
300233	2015	1	1	3.35277	Pharmaceutical manufacturing		21.4146	0.0813584	2.48491	1.63083	0.29536	2.19722	0.418222	0.333333	370000	0	0.178344	0.287657
300233	2016	1	1	3.44393	Pharmaceutical manufacturing		21.5373	0.0669404	2.56495	1.35339	0.28781	2.19722	0.410258	0.333333	370000	0	0.239073	0.287657
300233	2023	1	1	3.57823	Pharmaceutical manufacturing		22.5009	0.032153	2.99573	0.887112	0.308135	2.19722	0.26317	0	370000	0	0.216657	0.287657
300236	2016	1	1	3.83428	Chemical raw materials and chemical products manufacturing		21.1086	0.0356329	2.56495	1.77208	0.13615	2.19722	0.434702	0.4	310000	0	0.11332	0.287657
300236	2021	1	1	3.82102	Chemical raw materials and chemical products manufacturing		22.617	0.0154324	2.89037	1.15127	0.222641	2.07944	0.336811	0.2	310000	0	0.0470564	0.318454
300236	2023	1	1	3.85099	Chemical raw materials and chemical products manufacturing		22.444	0.0295555	2.99573	1.12576	0.21795	2.19722	0.334118	0.25	310000	0	0.058754	0.287657
300261	2021	3	1.667	3.5238	Chemical raw materials and chemical products manufacturing		22.0599	0.0500929	2.77259	1.82117	0.335701	2.19722	0.363198	0.2	320000	0	0	0.287657
300261	2023	1	1	3.49698	Chemical raw materials and chemical products manufacturing		22.1452	-0.0176106	2.89037	1.13677	0.346653	2.19722	0.335038	0.25	320000	0	0.139916	0.287657
300398	2021	1	1	3.80137	Chemical raw materials and chemical products manufacturing		22.4913	0.0661805	2.99573	1.26701	0.368641	2.19722	0.339659	0.428571	310000	0	0	0.287657
300398	2022	1	1	3.83798	Chemical raw materials and chemical products manufacturing		22.5648	0.0679782	3.04452	1.03955	0.332502	2.19722	0.294779	0.428571	310000	0	0.0311035	0.287657
300398	2023	1	1	3.81432	Chemical raw materials and chemical products manufacturing		22.5928	0.0207244	3.09104	0.982636	0.330024	2.19722	0.291368	0.285714	310000	0	0.0702177	0.287657
300437	2020	1	1	3.44345	Chemical raw materials and chemical products manufacturing		22.2021	-0.0936742	3.2581	0.741986	0.506924	2.19722	0.422025	0.2	410000	0	0	0.287657
300446	2022	1	1	3.2196	Chemical raw materials and chemical products manufacturing		20.5193	0.00660486	2.89037	1.28291	0.149914	2.19722	0.306938	0.4	130000	1	0.0141146	0.287657
300446	2023	1	1	3.51537	Chemical raw materials and chemical products manufacturing		22.9954	0.0527471	2.94444	0.762502	0.409251	2.19722	0.434305	0.333333	130000	1	0.0863119	0.287657
300481	2023	2	1.32	3.65877	Chemical raw materials and chemical products manufacturing		21.7606	0.0800217	3.09104	1.08454	0.125041	1.94591	0.339018	0.375	410000	0	0.110278	0.356695
300487	2017	2	0.875	3.3017	Chemical raw materials and chemical products manufacturing		20.7814	0.0840069	2.83321	1.11061	0.20591	2.19722	0.477622	0.428571	610000	0	0.0653614	0.287657
300487	2018	1	1	3.31189	Chemical raw materials and chemical products manufacturing		21.3425	0.0735141	2.89037	1.14989	0.391117	2.19722	0.469829	0.428571	610000	0	0	0.287657
300487	2019	1	1	3.30816	Chemical raw materials and chemical products manufacturing		21.5357	0.104439	2.94444	1.24719	0.358972	2.19722	0.460315	0.6	610000	0	0.128402	0.287657
300487	2020	1	1	3.44407	Chemical raw materials and chemical products manufacturing		21.6606	0.0737984	2.99573	1.31884	0.296218	2.19722	0.472835	0.666667	610000	0	0.0671318	0.287657
300487	2022	1	1	3.42014	Chemical raw materials and chemical products manufacturing		22.2412	0.110798	3.09104	1.54924	0.336673	2.19722	0.459459	0.571429	610000	0	0.0194919	0.287657
300487	2023	2	0.875	3.41198	Chemical raw materials and chemical products manufacturing		22.4629	0.119285	3.13549	1.49696	0.331594	2.19722	0.49708	0.571429	610000	0	0.0213638	0.287657
300505	2022	2	0.875	3.26488	Chemical raw materials and chemical products manufacturing		21.8406	0.111957	2.89037	1.02015	0.323661	1.94591	0.3307	0.2	530000	0	0.257829	0.356695
300505	2023	4	1.594	3.31405	Chemical raw materials and chemical products manufacturing		21.9913	-0.0280982	2.94444	0.860715	0.271908	1.94591	0.284125	0	530000	0	0.093807	0.356695
300522	2022	1	1	3.50543	Chemical raw materials and chemical products manufacturing		20.7367	0.0284852	3.09104	1.16308	0.189314	1.60944	0.440713	0.333333	320000	0	0.0490294	0.336472
300522	2023	2	1.5	3.70134	Chemical raw materials and chemical products manufacturing		20.8105	0.0159064	3.13549	1.4343	0.225161	1.60944	0.406644	0.333333	320000	0	0.00852229	0.336472
300530	2023	4	1.234	3.36555	Electrical machinery and equipment manufacturing		21.2376	-0.134945	3.09104	1.50595	0.616273	2.07944	0.56281	0.2	430000	1	0.0752801	0.318454
300568	2019	1	1	3.32495	Chemical raw materials and chemical products manufacturing		22.3965	0.0240936	2.83321	0.92837	0.428855	1.94591	0.316388	0	440000	0	0.153275	0.356695
300568	2020	1	1	3.42527	Chemical raw materials and chemical products manufacturing		22.4675	0.0175809	2.89037	1.249	0.396251	1.94591	0.240067	0	440000	0	0.0863199	0.356695
300568	2021	1	1	3.46973	Chemical raw materials and chemical products manufacturing		22.7536	0.0367566	2.94444	1.5533	0.35393	1.94591	0.261321	0	440000	0	0	0.356695
300568	2022	5	1.8	3.50609	Chemical raw materials and chemical products manufacturing		23.3407	0.0531254	2.99573	1.12648	0.317399	1.94591	0.224562	0	440000	0	0.116716	0.356695
300568	2023	1	1	3.53324	Chemical raw materials and chemical products manufacturing		23.6106	0.0325478	3.04452	0.93288	0.368146	1.94591	0.213584	0	440000	0	0.0227403	0.356695
300576	2017	1	1	3.31	Chemical raw materials and chemical products manufacturing		20.0413	0.0703374	3.09104	1.12601	0.177315	2.19722	0.489036	0.5	440000	0	0	0.287657
300576	2018	1	1	3.331	Chemical raw materials and chemical products manufacturing		20.1001	0.0756459	3.13549	1.01716	0.168756	2.19722	0.489036	0.5	440000	0	0	0.287657
300576	2019	1	1	3.36857	Chemical raw materials and chemical products manufacturing		20.3794	0.051988	3.17805	1.35906	0.297452	2.19722	0.489036	0.5	440000	0	0	0.287657
300576	2020	1	1	3.40757	Chemical raw materials and chemical products manufacturing		20.7346	0.054668	3.21888	1.67633	0.401405	2.19722	0.47164	0.571429	440000	0	0	0.287657
300576	2021	1	1	3.36689	Chemical raw materials and chemical products manufacturing		20.884	0.0335164	3.2581	1.62459	0.393289	2.19722	0.455945	0.571429	440000	0	0	0.287657
300576	2022	2	1.5	3.38349	Chemical raw materials and chemical products manufacturing		20.8989	0.0421662	3.29584	1.33698	0.300146	2.19722	0.418687	0.571429	440000	0	0	0.287657
300576	2023	3	1.667	3.4398	Computer, communication, and other electronic equipment manufacturing		21.2197	0.0501204	3.3322	1.60006	0.213866	2.19722	0.393283	0.571429	440000	0	0	0.287657
300596	2017	2	0.875	3.22425	Chemical raw materials and chemical products manufacturing		21.1226	0.0825722	2.70805	0.878493	0.323555	2.19722	0.434025	0.333333	120000	0	0.198128	0.287657
300596	2018	3	1.074	3.31209	Chemical raw materials and chemical products manufacturing		21.4251	0.0927503	2.77259	1.25599	0.37511	2.19722	0.455293	0.428571	120000	0	0.253091	0.287657
300596	2019	4	1.296	3.22966	Chemical raw materials and chemical products manufacturing		21.8707	0.080072	2.83321	1.11834	0.325545	2.3979	0.389953	0.333333	120000	0	0.215951	0.310128
300596	2020	5	1.393	3.24126	Chemical raw materials and chemical products manufacturing		22.0617	0.0731816	2.89037	1.21464	0.356461	2.3979	0.372976	0.428571	120000	0	0.221706	0.310128
300596	2021	8	1.765	3.53425	Chemical raw materials and chemical products manufacturing		22.442	0.0736311	2.94444	1.1195	0.424734	2.3979	0.370786	0.428571	120000	0	0.109907	0.310128
300596	2022	5	1.549	3.41375	Chemical raw materials and chemical products manufacturing		22.7492	0.0670478	2.99573	1.10934	0.393375	2.3979	0.333595	0.2	120000	0	0.0956345	0.310128
300596	2023	7	1.704	3.5121	Chemical raw materials and chemical products manufacturing		22.829	0.0426068	3.04452	0.826415	0.391312	2.3979	0.32756	0.166667	120000	0	0.0944165	0.310128
300637	2019	1	1	3.28297	Chemical raw materials and chemical products manufacturing		20.8175	0.0879841	2.89037	1.11732	0.258753	1.94591	0.440401	0.428571	330000	0	0.0764119	0.356695
300684	2018	1	1	3.57543	Chemical raw materials and chemical products manufacturing		20.6225	0.145082	3.09104	1.3334	0.220554	2.19722	0.512702	0.4	110000	0	0.134702	0.287657
300684	2019	2	0.875	3.54005	Chemical raw materials and chemical products manufacturing		20.7599	0.112362	3.13549	1.45302	0.209245	2.19722	0.495494	0.4	110000	0	0.122364	0.287657
300684	2020	2	0.875	3.58619	Chemical raw materials and chemical products manufacturing		21.4087	0.0895876	3.17805	1.08804	0.130699	2.19722	0.447185	0.5	110000	0	0.116444	0.287657
300684	2021	2	0.875	3.79828	Chemical raw materials and chemical products manufacturing		21.398	0.0645331	3.21888	1.19585	0.141769	2.19722	0.419329	0.5	110000	0	0.20057	0.287657
300684	2022	1	1	3.76552	Chemical raw materials and chemical products manufacturing		21.5522	0.0805747	3.2581	0.980961	0.216678	2.19722	0.412551	0.333333	110000	0	0.197172	0.287657
300684	2023	1	1	3.79577	Computer, communication, and other electronic equipment manufacturing		21.5396	0.0313009	3.29584	1.16928	0.15045	2.19722	0.3841	0.4	110000	0	0.16684	0.287657
300725	2018	1	1	3.2424	Chemical raw materials and chemical products manufacturing		20.4504	0.162715	2.56495	1.83378	0.192343	1.94591	0.392171	0.777778	320000	0	0	0.356695
300725	2019	1	1	3.31931	Chemical raw materials and chemical products manufacturing		20.752	0.137818	2.63906	2.07378	0.246943	1.94591	0.367299	0.777778	320000	0	0	0.356695
300725	2020	1	1	3.42638	Chemical raw materials and chemical products manufacturing		21.6092	0.0732054	2.70805	2.08673	0.197838	1.94591	0.31734	0.777778	320000	0	0.157668	0.356695
300725	2022	1	1	3.49298	Chemical raw materials and chemical products manufacturing		22.3048	0.0648749	2.83321	1.46506	0.373911	1.94591	0.298813	0.666667	320000	0	0.210146	0.356695
300727	2022	1	1	3.45615	Chemical raw materials and chemical products manufacturing		21.0906	0.0605543	3.13549	1.22322	0.357283	1.94591	0.504003	0.714286	330000	0	0.0436274	0.356695
300727	2023	1	1	3.50329	Chemical raw materials and chemical products manufacturing		21.1965	0.0499475	3.17805	1.26525	0.366176	1.94591	0.486454	0.5	330000	0	0.116966	0.356695
300801	2019	1	1	3.42893	Chemical raw materials and chemical products manufacturing		21.3883	0.0845754	2.63906	0.857926	0.102907	1.60944	0.528273	0	370000	0	0.168872	0.336472
300801	2020	1	1	3.5907	Chemical raw materials and chemical products manufacturing		21.4767	0.0879092	2.70805	0.904794	0.113614	1.60944	0.528273	0	370000	0	0.170455	0.336472
300848	2021	2	1.5	3.52198	Chemical raw materials and chemical products manufacturing		21.2468	0.0683029	2.56495	0.957726	0.356904	1.94591	0.527376	0.5	370000	0	0.0905801	0.356695
300848	2022	1	1	3.35595	Chemical raw materials and chemical products manufacturing		21.373	0.0562593	2.63906	1.0081	0.317521	1.94591	0.524066	0.5	370000	0	0.126848	0.356695
300848	2023	2	0.875	3.38647	Chemical raw materials and chemical products manufacturing		21.9337	0.0259219	2.70805	1.01942	0.439971	1.94591	0.534207	0.5	370000	0	0.0794519	0.356695
300910	2020	1	1	3.22191	Chemical raw materials and chemical products manufacturing		21.5576	0.0763973	3.21888	1.01766	0.0937539	2.19722	0.498771	0.333333	410000	0	0	0.287657
300910	2021	5	1.7	3.22992	Chemical raw materials and chemical products manufacturing		21.6226	0.0786232	3.2581	1.34211	0.115147	2.19722	0.509497	0.571429	410000	0	0.0118247	0.287657
300910	2022	1	1	3.29602	Chemical raw materials and chemical products manufacturing		21.946	0.159656	3.29584	1.57179	0.173547	2.19722	0.489279	0.5	410000	0	0.142517	0.287657
300955	2023	1	1	3.29842	Chemical raw materials and chemical products manufacturing		21.2498	0.0234462	2.94444	0.8435	0.345505	1.94591	0.503897	0.2	350000	0	0.0268184	0.356695
300957	2021	5	1.6	3.32734	Chemical raw materials and chemical products manufacturing		22.4833	0.138593	2.48491	1.33037	0.163731	2.19722	0.615109	0.6	530000	0	0.0111186	0.287657
300957	2022	7	1.631	3.3413	Chemical raw materials and chemical products manufacturing		22.6282	0.145261	2.56495	1.85645	0.153788	2.19722	0.555507	0.6	530000	0	0.0101917	0.287657
300957	2023	11	1.639	3.40673	Chemical raw materials and chemical products manufacturing		22.7391	0.0963413	2.63906	1.27057	0.18118	2.19722	0.546606	0.666667	530000	0	0.026532	0.287657
301037	2022	1	1	3.22814	Chemical raw materials and chemical products manufacturing		21.6468	0.00227575	3.09104	0.735654	0.512758	1.94591	0.55464	0	310000	0	0.204354	0.356695
301059	2021	1	1	3.35	Chemical raw materials and chemical products manufacturing		20.2863	0.0754073	2.94444	1.00184	0.158114	1.60944	0.553872	0	440000	0	0.0346215	0.336472
301059	2022	2	0.875	3.35572	Chemical raw materials and chemical products manufacturing		20.3548	0.0911589	2.99573	0.989267	0.160597	1.60944	0.553872	0.2	440000	0	0.0881006	0.336472
301059	2023	2	1.5	3.27039	Chemical raw materials and chemical products manufacturing		20.3638	0.0489122	3.04452	1.06925	0.167081	1.79176	0.574932	0.2	440000	0	0.0455798	0.287657
301065	2022	1	1	3.22235	Chemical raw materials and chemical products manufacturing		21.0558	0.0417775	2.48491	0.82687	0.100564	1.94591	0.423969	0.111111	330000	0	0	0.356695
301069	2022	2	1.5	3.25448	Chemical raw materials and chemical products manufacturing		21.2352	0.131564	2.89037	1.39552	0.138383	2.19722	0.491462	0.25	370000	0	0.0679425	0.287657
301190	2021	3	1.667	3.23018	Chemical raw materials and chemical products manufacturing		21.521	0.0621427	2.30259	0.908775	0.105054	2.19722	0.448643	0.166667	360000	0	0.0224174	0.287657
301190	2022	3	1.667	3.29646	Chemical raw materials and chemical products manufacturing		21.5331	0.0437126	2.3979	0.818615	0.0866935	2.19722	0.448643	0.2	360000	0	0	0.287657
301190	2023	2	0.875	3.21688	Chemical raw materials and chemical products manufacturing		21.6199	0.00855205	2.48491	0.822645	0.160773	2.19722	0.448643	0	360000	0	0.043166	0.287657
301209	2022	1	1	3.22038	Chemical raw materials and chemical products manufacturing		20.4799	0.0786521	2.77259	0.861635	0.137818	1.60944	0.559616	0.333333	370000	0	0.168978	0.336472
301209	2023	1	1	3.21569	Chemical raw materials and chemical products manufacturing		20.5132	0.0408899	2.83321	0.914104	0.14087	1.60944	0.558008	0	370000	0	0.124677	0.336472
301216	2022	1	1	3.30821	Chemical raw materials and chemical products manufacturing		23.1729	0.0793668	2.70805	0.732722	0.416848	1.94591	0.430327	0.4	330000	0	0.249543	0.356695
301216	2023	2	1.5	3.33534	Chemical raw materials and chemical products manufacturing		23.2696	0.0336186	2.77259	0.726589	0.43999	1.94591	0.421306	0.2	330000	0	0.25773	0.356695
301238	2022	1	1	3.3699	Chemical raw materials and chemical products manufacturing		23.0461	0.0810088	2.07944	0.786523	0.271871	2.19722	0.566089	0	320000	1	0.0807215	0.287657
301349	2022	2	0.875	3.39541	Chemical raw materials and chemical products manufacturing		21.8324	0.0479732	3.13549	0.862156	0.0730136	1.60944	0.518758	0	210000	0	0.0398976	0.336472
301349	2023	1	1	3.31934	Chemical raw materials and chemical products manufacturing		21.8725	0.013689	3.17805	0.817928	0.114882	1.60944	0.506587	0	210000	0	0.0922029	0.336472
301371	2023	1	1	3.25506	Chemical raw materials and chemical products manufacturing		22.4964	0.119767	2.19722	0.767648	0.04776	1.60944	0.638375	0.333333	230000	0	0.0104135	0.336472
301373	2023	1	1	3.21592	Chemical raw materials and chemical products manufacturing		21.2473	0.0714032	2.83321	0.810943	0.106842	1.94591	0.508924	0	440000	0	0.0270543	0.356695
301393	2023	1	1	3.22407	Chemical raw materials and chemical products manufacturing		21.5505	0.0423675	3.04452	0.877291	0.0475616	2.19722	0.495001	0.5	320000	0	0	0.287657
301395	2023	1	1	3.29409	Chemical raw materials and chemical products manufacturing		21.3951	0.0280991	2.56495	0.755831	0.142625	2.19722	0.408863	0.25	440000	0	0.0950511	0.287657
301487	2023	1	1	3.34903	Chemical raw materials and chemical products manufacturing		22.0438	0.0150075	2.70805	0.935982	0.383358	2.19722	0.424813	0	120000	0	0.0329736	0.287657
301518	2023	1	1	3.43416	Chemical raw materials and chemical products manufacturing		21.2707	0.0650364	2.63906	0.811646	0.151461	2.19722	0.528286	0	320000	0	0.024648	0.287657
600075	2011	2	1.5	3.33811	Chemical raw materials and chemical products manufacturing		22.2209	0.0226082	2.70805	0.852066	0.397489	2.19722	0.374563	0.125	650000	1	0.153617	0.287657
600075	2012	5	1.8	3.34306	Chemical raw materials and chemical products manufacturing		22.2236	-0.0174044	2.77259	0.772354	0.411723	2.19722	0.365246	0.125	650000	1	0.096806	0.287657
600075	2013	6	1.685	3.36961	Chemical raw materials and chemical products manufacturing		22.2279	-0.0496382	2.83321	0.782011	0.445001	2.19722	0.369689	0.125	650000	1	0.0808685	0.287657
600075	2015	12	1.778	3.54517	Chemical raw materials and chemical products manufacturing		21.9792	0.00879244	2.94444	1.01297	0.347748	2.19722	0.366085	0.142857	650000	1	0.0189042	0.287657
600075	2016	12	1.792	3.68923	Chemical raw materials and chemical products manufacturing		22.8665	0.0505357	2.99573	0.842392	0.403106	2.19722	0.452603	0.142857	650000	1	0.0173887	0.287657
600075	2017	9	1.823	3.74839	Chemical raw materials and chemical products manufacturing		22.9089	0.0585727	3.04452	0.819067	0.381298	2.07944	0.452603	0.142857	650000	1	0.0331046	0.318454
600075	2018	10	1.847	3.70278	Chemical raw materials and chemical products manufacturing		22.8817	0.0520633	3.09104	0.653363	0.337262	2.19722	0.452603	0.166667	650000	1	0.067502	0.287657
600075	2019	15	1.875	3.73276	Chemical raw materials and chemical products manufacturing		22.8112	-0.000951035	3.13549	0.682898	0.314586	2.19722	0.450236	0.2	650000	1	0.162086	0.287657
600075	2020	21	1.913	3.80131	Chemical raw materials and chemical products manufacturing		23.4161	0.0587411	3.17805	0.703888	0.39782	1.94591	0.49982	0.428571	650000	1	0.0767163	0.356695
600075	2021	20	1.913	3.82092	Chemical raw materials and chemical products manufacturing		23.5095	0.0940462	3.21888	0.781571	0.328576	2.19722	0.412848	0.428571	650000	1	0.0937344	0.287657
600075	2022	23	1.919	3.91447	Chemical raw materials and chemical products manufacturing		23.7216	0.0392324	3.2581	0.663291	0.375054	2.19722	0.416125	0.571429	650000	1	0.0893251	0.287657
600075	2023	20	1.911	3.73462	Chemical raw materials and chemical products manufacturing		23.7709	-0.041757	3.29584	0.647433	0.445002	2.07944	0.415891	0.5	650000	1	0.0560191	0.318454
600096	2011	1	1	3.4055	Chemical raw materials and chemical products manufacturing		24.0217	0.00877504	2.70805	0.722976	0.524679	2.19722	0.435769	0.142857	530000	1	0	0.287657
600096	2012	1	1	3.33737	Chemical raw materials and chemical products manufacturing		24.0225	-0.0204391	2.77259	0.730463	0.556321	2.19722	0.435115	0.333333	530000	1	0.0306773	0.287657
600096	2013	1	1	3.36835	Chemical raw materials and chemical products manufacturing		24.9079	0.00740186	2.83321	0.694034	0.616523	2.19722	0.512912	0	530000	1	0.0902814	0.287657
600096	2014	1	1	3.2778	Chemical raw materials and chemical products manufacturing		24.9502	-0.041067	2.89037	0.716024	0.642378	2.19722	0.512912	0	530000	1	0.219456	0.287657
600096	2016	3	1.667	3.39424	Chemical raw materials and chemical products manufacturing		24.9387	-0.053638	2.99573	0.73878	0.634951	2.3979	0.509784	0	530000	1	0.0132382	0.310128
600096	2017	3	1.667	3.42721	Chemical raw materials and chemical products manufacturing		24.8752	0.0040711	3.04452	0.722317	0.635578	2.3979	0.514325	0	530000	1	0.0212593	0.310128
600096	2019	1	1	3.49019	Chemical raw materials and chemical products manufacturing		24.8175	0.00295564	3.13549	0.701168	0.632712	2.3979	0.481628	0	530000	1	0.0369227	0.310128
600096	2020	1	1	3.57444	Chemical raw materials and chemical products manufacturing		24.6933	0.00742196	3.17805	0.694119	0.60909	2.3979	0.453203	0	530000	1	0.0139414	0.310128
600096	2021	4	1.594	3.61968	Chemical raw materials and chemical products manufacturing		24.6962	0.0761848	3.21888	0.877261	0.566984	2.3979	0.367067	0	530000	1	0.0370779	0.310128
600096	2022	5	1.618	3.66653	Chemical raw materials and chemical products manufacturing		24.6978	0.124322	3.2581	0.848845	0.491799	2.3979	0.358042	0	530000	1	0.0556441	0.310128
600096	2023	3	1.667	3.6788	Chemical raw materials and chemical products manufacturing		24.6854	0.0993875	3.29584	0.751169	0.458258	2.3979	0.356002	0	530000	1	0.216282	0.310128
600135	2011	1	1	3.4062	Chemical raw materials and chemical products manufacturing		20.758	-0.0514096	2.63906	1.42186	0.088556	2.19722	0.340705	0.333333	130000	1	0	0.287657
600135	2012	1	1	3.38411	Chemical raw materials and chemical products manufacturing		20.7964	0.0288583	2.70805	1.12655	0.0936443	2.19722	0.317634	0.333333	130000	1	0.0841539	0.287657
600135	2014	1	1	3.34797	Chemical raw materials and chemical products manufacturing		20.8951	0.0258786	2.83321	1.45544	0.142268	2.19722	0.334568	0.333333	130000	1	0.156324	0.287657
600135	2016	2	1.5	3.35972	Chemical raw materials and chemical products manufacturing		21.445	0.0218053	2.94444	1.29761	0.178099	2.19722	0.338393	0.333333	130000	1	0.133309	0.367694
600135	2017	1	1	3.47582	Chemical raw materials and chemical products manufacturing		21.583	0.0256961	2.99573	1.09249	0.246417	2.19722	0.318725	0.333333	130000	1	0.0655328	0.287657
600135	2022	1	1	3.59344	Chemical raw materials and chemical products manufacturing		21.9758	0.011624	3.21888	0.886043	0.207121	2.19722	0.424046	0.2	130000	1	0.0797744	0.287657
600135	2023	1	1	3.63325	Chemical raw materials and chemical products manufacturing		22	-0.0125202	3.2581	0.933663	0.261048	2.19722	0.399454	0.142857	130000	1	0.0992174	0.287657
600160	2013	1	1	3.40295	Chemical raw materials and chemical products manufacturing		22.9847	0.0257922	2.77259	0.802654	0.199386	2.48491	0.4815	0	330000	1	0.0283653	0.34833
600160	2014	1	1	3.27477	Chemical raw materials and chemical products manufacturing		22.9157	0.0181297	2.83321	0.918299	0.171322	2.3979	0.482534	0	330000	1	0.0488736	0.310128
600160	2015	2	1.5	3.59516	Chemical raw materials and chemical products manufacturing		22.9417	0.017721	2.89037	1.76317	0.18865	2.48491	0.509652	0	330000	1	0.0933638	0.287657
600160	2016	1	1	3.51402	Chemical raw materials and chemical products manufacturing		23.1965	0.0129087	2.94444	1.05104	0.113217	2.48491	0.515439	0	330000	1	0.0791317	0.287657
600160	2017	1	1	3.57715	Chemical raw materials and chemical products manufacturing		23.2843	0.0703824	2.99573	1.05254	0.148088	2.48491	0.491832	0	330000	1	0.100043	0.287657
600160	2018	1	1	3.61153	Chemical raw materials and chemical products manufacturing		23.4489	0.133644	3.04452	0.848938	0.144973	2.48491	0.485074	0	330000	1	0.0850233	0.287657
600160	2019	1	1	3.61363	Chemical raw materials and chemical products manufacturing		23.4567	0.0579585	3.09104	0.891957	0.131858	2.48491	0.482321	0	330000	1	0.128893	0.287657
600160	2020	3	1.16	3.72891	Chemical raw materials and chemical products manufacturing		23.4764	0.0065083	3.13549	0.945907	0.165365	2.3979	0.504093	0	330000	1	0.0959739	0.310128
600160	2021	1	1	3.79448	Chemical raw materials and chemical products manufacturing		23.6078	0.0585024	3.17805	1.15875	0.21365	2.48491	0.490162	0	330000	1	0.105682	0.287657
600160	2022	4	1.358	3.85917	Chemical raw materials and chemical products manufacturing		23.8424	0.100665	3.21888	1.14836	0.264207	2.48491	0.481556	0	330000	1	0.0974586	0.287657
600160	2023	3	1.16	3.78925	Chemical raw materials and chemical products manufacturing		23.8753	0.04059	3.2581	1.16424	0.262101	2.48491	0.463565	0	330000	1	0.0767287	0.287657
600226	2011	1	1	3.40415	Pharmaceutical manufacturing		21.5609	0.0431267	2.56495	0.996347	0.329565	2.19722	0.374884	0.142857	330000	0	0.251951	0.287657
600226	2012	1	1	3.33559	Chemical raw materials and chemical products manufacturing		21.5186	0.0132521	2.63906	0.896873	0.302635	2.19722	0.353867	0	330000	0	0	0.287657
600227	2022	1	1	3.636	Pharmaceutical manufacturing		22.2529	-0.0838888	3.21888	0.867622	0.332008	2.19722	0.338085	0	520000	0	0.0410609	0.287657
600229	2012	1	1	3.34125	Chemical raw materials and chemical products manufacturing		21.7314	-0.111075	2.94444	0.884706	0.452119	2.3979	0.31263	0.125	370000	1	0.0355151	0.310128
600249	2012	1	1	3.33913	Chemical raw materials and chemical products manufacturing		21.9005	0.0105638	2.94444	0.684227	0.294945	1.60944	0.24974	0.125	450000	1	0.0490415	0.451967
600249	2013	1	1	3.36666	Chemical raw materials and chemical products manufacturing		21.9001	0.00282545	2.99573	0.770452	0.331913	2.19722	0.253801	0.142857	450000	1	0.031233	0.287657
600249	2015	1	1	3.56364	Chemical raw materials and chemical products manufacturing		22.1016	-0.0599194	3.09104	0.955573	0.368751	2.19722	0.34806	0.142857	450000	1	0.15396	0.287657
600249	2016	2	1.5	3.37526	Chemical raw materials and chemical products manufacturing		21.9101	-0.00203948	3.13549	1.0131	0.326376	2.19722	0.346598	0	450000	1	0.112326	0.287657
600273	2015	2	1.5	3.49467	Chemical raw materials and chemical products manufacturing		22.4943	0.108767	2.89037	0.916878	0.346498	2.19722	0.452686	0.4	330000	0	0.176591	0.287657
600273	2016	1	1	3.53791	Chemical raw materials and chemical products manufacturing		22.6413	0.103593	2.94444	0.939664	0.347347	2.19722	0.419287	0.4	330000	0	0.147542	0.287657
600273	2018	1	1	3.51611	Chemical raw materials and chemical products manufacturing		22.8212	0.127058	3.04452	1.0172	0.178338	2.19722	0.416471	0.333333	330000	0	0.0496565	0.287657
600277	2011	2	0.875	3.33899	Chemical raw materials and chemical products manufacturing		23.5156	0.0288296	2.56495	0.696243	0.437559	1.94591	0.620328	0.166667	150000	0	0	0.356695
600277	2012	2	0.875	3.34124	Chemical raw materials and chemical products manufacturing		23.6659	0.0129577	2.63906	0.753825	0.497668	1.94591	0.619031	0.285714	150000	0	0.0874224	0.356695
600277	2014	2	0.875	3.51805	Chemical raw materials and chemical products manufacturing		23.727	0.0114281	2.77259	0.889111	0.411102	1.94591	0.484025	0.125	150000	0	0.193653	0.356695
600277	2015	2	0.875	3.63816	Chemical raw materials and chemical products manufacturing		23.7546	0.00732157	2.83321	0.885396	0.41176	1.94591	0.478552	0.142857	150000	0	0.180561	0.356695
600277	2016	4	1.437	3.81478	Chemical raw materials and chemical products manufacturing		23.8715	0.016691	2.89037	0.783062	0.438508	1.79176	0.493901	0.142857	150000	0	0.123955	0.405465
600277	2017	1	1	3.91148	Chemical raw materials and chemical products manufacturing		24.0969	0.0253871	2.94444	0.717508	0.378627	1.94591	0.461495	0	150000	0	0.146837	0.356695
600277	2018	2	0.875	3.85124	Chemical raw materials and chemical products manufacturing		24.3257	0.0302006	2.99573	0.666451	0.421009	1.94591	0.461495	0	150000	0	0.0182587	0.356695
600277	2019	2	0.875	3.76082	Chemical raw materials and chemical products manufacturing		24.2638	0.0314507	3.04452	0.606217	0.383393	1.79176	0.459136	0	150000	0	0.052213	0.405465
600277	2020	1	1	3.71414	Chemical raw materials and chemical products manufacturing		24.3184	0.0177336	3.09104	0.589127	0.38933	1.79176	0.458513	0	150000	0	0.295092	0.405465
600277	2021	1	1	3.85137	Chemical raw materials and chemical products manufacturing		24.2524	0.0245593	3.13549	0.680497	0.353806	2.07944	0.443685	0	150000	0	0.165119	0.318454
600277	2022	2	1.5	3.78211	Chemical raw materials and chemical products manufacturing		24.2807	0.0262031	3.17805	0.618321	0.358688	2.19722	0.414842	0	150000	0	0.15752	0.287657
600277	2023	2	1.5	3.77401	Chemical raw materials and chemical products manufacturing		24.1683	-0.0191925	3.21888	0.58478	0.328291	2.19722	0.395449	0	150000	0	0.227238	0.287657
600309	2011	5	1.7	3.36739	Chemical raw materials and chemical products manufacturing		23.5808	0.12885	2.63906	1.14095	0.424185	2.3979	0.447111	0.2	370000	1	0.189063	0.310128
600309	2013	1	1	3.39572	Chemical raw materials and chemical products manufacturing		24.1619	0.114147	2.77259	1.11807	0.483489	2.3979	0.455467	0.2	370000	1	0.0795754	0.310128
600309	2014	1	1	3.30697	Chemical raw materials and chemical products manufacturing		24.4512	0.0745132	2.83321	1.03421	0.519134	2.3979	0.440389	0.2	370000	1	0.0812134	0.310128
600309	2015	1	1	3.36182	Chemical raw materials and chemical products manufacturing		24.5904	0.0465831	2.89037	0.915221	0.524681	2.3979	0.452656	0.833333	370000	1	0.0819459	0.310128
600309	2021	3	1.667	3.63584	Chemical raw materials and chemical products manufacturing		25.9719	0.123608	3.17805	0.949638	0.484442	2.3979	0.471649	0.666667	370000	1	0.0480457	0.310128
600315	2011	2	1.5	3.41475	Chemical raw materials and chemical products manufacturing		21.6581	0.133936	2.83321	1.82412	0.262674	1.79176	0.36563	0	310000	0	0	0.287657
600315	2013	2	1.5	3.7339	Chemical raw materials and chemical products manufacturing		22.2318	0.164623	2.94444	1.99474	0.227518	2.19722	0.317898	0	310000	0	0.109928	0.287657
600315	2014	2	1.5	3.76418	Chemical raw materials and chemical products manufacturing		22.4341	0.151865	2.99573	1.69062	0.271819	2.07944	0.327248	0.166667	310000	0	0.0735445	0.318454
600315	2015	2	1.5	3.75938	Chemical raw materials and chemical products manufacturing		22.8224	0.174158	3.04452	1.51487	0.260744	1.94591	0.355538	0	310000	0	0.0407804	0.356695
600315	2016	1	1	3.61942	Chemical raw materials and chemical products manufacturing		22.7557	0.0259917	3.09104	1.30733	0.270253	1.94591	0.334436	0	310000	0	0.0575947	0.356695
600315	2019	1	1	3.69781	Chemical raw materials and chemical products manufacturing		23.1345	0.0487659	3.21888	1.19368	0.361951	1.94591	0.466826	0	310000	0	0.115357	0.356695
600315	2021	2	1.5	3.76297	Chemical raw materials and chemical products manufacturing		23.2202	0.0520763	3.29584	1.2994	0.355349	1.94591	0.489632	0	310000	0	0.0369091	0.356695
600315	2023	2	1.499	3.76635	Chemical raw materials and chemical products manufacturing		23.1854	0.041747	3.3673	0.941136	0.295944	1.94591	0.45912	0	310000	0	0.195732	0.356695
600319	2011	1	1	3.33796	Chemical raw materials and chemical products manufacturing		21.9656	-0.0182963	2.48491	0.788046	0.547503	2.19722	0.441961	0	370000	1	0.516996	0.367694
600328	2014	1	1	3.27508	Chemical raw materials and chemical products manufacturing		22.6435	-0.0137746	2.83321	0.818312	0.585328	2.19722	0.378225	0.285714	150000	1	0.0642688	0.287657
600328	2018	4	1.417	3.29049	Chemical raw materials and chemical products manufacturing		22.6347	0.0640996	3.04452	0.702569	0.45442	2.07944	0.313627	0.125	150000	1	0.139577	0.318454
600328	2019	1	1	3.39973	Chemical raw materials and chemical products manufacturing		23.3721	0.0737888	3.09104	0.606473	0.456172	2.19722	0.30828	0.142857	150000	1	0.204328	0.287657
600339	2015	1	1	3.40379	Chemical raw materials and chemical products manufacturing		21.9005	-0.203161	2.83321	1.19927	0.634652	2.07944	0.3252	0.333333	650000	1	0.0427233	0.405465
600346	2018	1	1	3.61954	Chemical Fiber Manufacturing		25.5535	0.0268046	2.99573	0.720938	0.57502	1.94591	0.562263	0.285714	210000	0	0.0664181	0.356695
600346	2021	1	1	3.92236	Chemical Fiber Manufacturing		26.0718	0.0712849	3.13549	0.914843	0.546689	1.94591	0.554618	0.333333	210000	0	0.141636	0.356695
600352	2011	7	1.564	3.39173	Chemical raw materials and chemical products manufacturing		23.5822	0.0458929	2.63906	0.727164	0.462273	2.19722	0.288555	0.375	330000	0	0.0531757	0.287657
600352	2012	4	1.437	3.4081	Chemical raw materials and chemical products manufacturing		23.5655	0.0461097	2.70805	0.708803	0.413388	2.19722	0.2859	0.375	330000	0	0.130563	0.287657
600352	2013	3	1.16	3.36854	Chemical raw materials and chemical products manufacturing		23.6664	0.0742635	2.77259	0.92907	0.38935	2.30259	0.27968	0.2	330000	0	0.122312	0.336472
600352	2014	8	1.726	3.58327	Chemical raw materials and chemical products manufacturing		23.8598	0.115064	2.83321	1.02137	0.384768	2.19722	0.259432	0.4	330000	0	0.194517	0.287657
600352	2015	6	1.694	3.6242	Chemical raw materials and chemical products manufacturing		24.0053	0.102623	2.89037	1.03146	0.360503	2.19722	0.259549	0.4	330000	0	0.198988	0.287657
600352	2016	3	1.667	3.54824	Chemical raw materials and chemical products manufacturing		24.4106	0.0603018	2.94444	0.83145	0.447965	2.19722	0.268618	0.4	330000	0	0.216305	0.287657
600352	2017	4	1.594	3.57184	Chemical raw materials and chemical products manufacturing		24.5595	0.0572615	2.99573	0.870864	0.464788	2.19722	0.262966	0.4	330000	0	0.22855	0.287657
600352	2018	2	1.5	3.52711	Chemical raw materials and chemical products manufacturing		24.6787	0.0775856	3.04452	0.779672	0.457117	2.19722	0.255497	0.25	330000	0	0.18374	0.287657
600352	2019	2	0.875	3.52308	Chemical raw materials and chemical products manufacturing		24.6665	0.0979127	3.09104	0.872414	0.392094	2.19722	0.263383	0.333333	330000	0	0.118085	0.287657
600352	2020	5	1.523	3.58358	Chemical raw materials and chemical products manufacturing		24.7542	0.0749322	3.13549	0.812128	0.382442	2.19722	0.253	0.4	330000	0	0.222935	0.287657
600352	2021	3	1.389	3.53688	Chemical raw materials and chemical products manufacturing		24.9088	0.0558466	3.17805	0.75253	0.404508	2.19722	0.250641	0.4	330000	0	0.180693	0.287657
600352	2022	4	1.594	3.57962	Chemical raw materials and chemical products manufacturing		24.9001	0.0497904	3.21888	0.673386	0.382938	2.19722	0.240544	0.4	330000	0	0.17317	0.287657
600352	2023	7	1.857	3.64621	Chemical raw materials and chemical products manufacturing		24.9399	0.0252367	3.2581	0.62932	0.387508	2.19722	0.257218	0.5	330000	0	0.164772	0.287657
600367	2011	1	1	3.33733	Chemical raw materials and chemical products manufacturing		21.2192	0.0522426	2.56495	1.22388	0.187934	2.3979	0.413748	0	520000	1	0.0213319	0.262364
600367	2012	1	1	3.4056	Chemical raw materials and chemical products manufacturing		21.2758	0.0164181	2.63906	1.08556	0.217837	2.19722	0.383496	0	520000	1	0.121319	0.287657
600367	2013	1	1	3.36621	Chemical raw materials and chemical products manufacturing		21.2923	0.00452163	2.70805	0.975674	0.231196	2.19722	0.37581	0.166667	520000	1	0.107946	0.287657
600367	2014	1	1	3.34994	Chemical raw materials and chemical products manufacturing		21.3137	0.0159673	2.77259	1.11535	0.233323	2.19722	0.403104	0.166667	520000	1	0.0461549	0.287657
600367	2018	2	1.5	3.34201	Chemical raw materials and chemical products manufacturing		21.3642	0.0653166	2.99573	0.877149	0.254117	2.19722	0.316463	0.333333	520000	1	0.146538	0.441861
600367	2019	3	1.667	3.3656	Chemical raw materials and chemical products manufacturing		21.4423	0.0398785	3.04452	0.874916	0.270188	2.19722	0.324632	0.4	520000	1	0.0961008	0.441861
600367	2020	1	1	3.39477	Chemical raw materials and chemical products manufacturing		21.431	0.0250544	3.09104	0.849572	0.2531	2.19722	0.326949	0.4	520000	1	0.0490294	0.441861
600367	2023	1	1	3.65969	Chemical raw materials and chemical products manufacturing		21.8738	0.0137995	3.21888	0.91553	0.178517	1.94591	0.359872	0.2	520000	1	0.180286	0.356695
600409	2022	1	1	3.57011	Chemical raw materials and chemical products manufacturing		24.0413	0.0468539	3.17805	0.676155	0.386638	2.56495	0.405282	0.125	130000	1	0.124477	0.325411
600426	2014	1	1	3.34742	Chemical raw materials and chemical products manufacturing		23.2921	0.0598169	2.70805	0.829735	0.400969	2.3979	0.351141	0	370000	1	0	0.310128
600426	2015	1	1	3.32072	Chemical raw materials and chemical products manufacturing		23.175	0.0750419	2.77259	0.937506	0.310961	2.3979	0.352067	0	370000	1	0	0.310128
600426	2016	1	1	3.23342	Chemical raw materials and chemical products manufacturing		23.3039	0.0641921	2.83321	0.9667	0.323525	2.3979	0.350165	0	370000	1	0.0865092	0.310128
600426	2020	1	1	3.54412	Chemical raw materials and chemical products manufacturing		23.7461	0.0838999	3.04452	1.43093	0.213884	2.3979	0.370906	0	370000	1	0.14658	0.310128
600426	2021	2	1.5	3.38495	Chemical raw materials and chemical products manufacturing		24.0785	0.196982	3.09104	1.25636	0.188615	2.3979	0.335722	0	370000	1	0.18922	0.310128
600470	2012	1	1	3.33868	Chemical raw materials and chemical products manufacturing		22.5921	0.00829473	2.56495	0.855738	0.478879	2.07944	0.275328	0.285714	340000	1	0	0.318454
600470	2013	1	1	3.36684	Chemical raw materials and chemical products manufacturing		22.5838	-0.00156386	2.63906	0.764515	0.482695	2.07944	0.277735	0.25	340000	1	0.03373	0.318454
600470	2014	1	1	3.34881	Chemical raw materials and chemical products manufacturing		22.5843	-0.0533476	2.70805	0.792384	0.513345	2.19722	0.283798	0.125	340000	1	0.0560371	0.287657
600470	2015	1	1	3.48028	Chemical raw materials and chemical products manufacturing		22.545	0.006269	2.77259	0.959147	0.500907	2.07944	0.262172	0.125	340000	1	0	0.318454
600470	2016	1	1	3.33374	Chemical raw materials and chemical products manufacturing		22.4875	-0.0360871	2.83321	0.888928	0.513537	2.19722	0.257571	0.142857	340000	1	0.0657916	0.287657
600470	2017	1	1	3.43293	Chemical raw materials and chemical products manufacturing		22.4295	0.00715517	2.89037	0.781308	0.498642	2.19722	0.269106	0.111111	340000	1	0.0827145	0.287657
600470	2018	1	1	3.47872	Chemical raw materials and chemical products manufacturing		22.4751	-0.095649	2.94444	0.74164	0.565378	2.07944	0.277464	0.111111	340000	1	0.0239017	0.318454
600470	2019	3	1.074	3.54657	Chemical raw materials and chemical products manufacturing		22.2551	-0.0572268	2.99573	0.806141	0.563454	1.60944	0.283702	0.125	340000	0	0.181768	0.336472
600470	2021	5	1.47	3.64052	Chemical raw materials and chemical products manufacturing		22.4041	0.0578454	3.09104	0.86718	0.525648	1.60944	0.27921	0.142857	340000	0	0.0222034	0.336472
600470	2022	1	1	3.60189	Chemical raw materials and chemical products manufacturing		22.6685	0.0386278	3.13549	0.781373	0.545737	1.60944	0.270579	0.333333	340000	0	0.12103	0.336472
600470	2023	2	1.5	3.75191	Chemical raw materials and chemical products manufacturing		22.5006	0.00880239	3.17805	0.781846	0.513069	1.79176	0.286856	0.25	340000	0	0.0472157	0.405465
600486	2011	4	1.594	3.4065	Chemical raw materials and chemical products manufacturing		21.713	0.0565646	2.56495	0.809789	0.272484	2.19722	0.390246	0	320000	1	0.307273	0.287657
600486	2012	6	1.764	3.34105	Chemical raw materials and chemical products manufacturing		21.8818	0.06083	2.63906	0.89366	0.311329	2.19722	0.419632	0	320000	1	0.0597549	0.287657
600486	2013	5	1.618	3.36953	Chemical raw materials and chemical products manufacturing		22.0156	0.101957	2.70805	1.10097	0.302061	2.19722	0.426369	0	320000	1	0.128491	0.287657
600486	2014	4	1.437	3.34993	Chemical raw materials and chemical products manufacturing		22.1837	0.103339	2.77259	1.14919	0.300948	2.19722	0.404645	0.181818	320000	1	0.0375843	0.287657
600486	2015	5	1.7	3.32477	Chemical raw materials and chemical products manufacturing		22.2617	0.0962211	2.83321	1.18103	0.26656	2.19722	0.408542	0.181818	320000	1	0.0555081	0.287657
600486	2016	6	1.637	3.23697	Chemical raw materials and chemical products manufacturing		22.4638	0.076913	2.89037	1.23379	0.318785	2.19722	0.401616	0.181818	320000	1	0.0553085	0.287657
600486	2017	3	1.389	3.2215	Chemical raw materials and chemical products manufacturing		22.6811	0.0820172	2.94444	1.28142	0.356196	2.19722	0.39932	0.181818	320000	1	0.0606982	0.287657
600486	2018	4	1.465	3.2658	Chemical raw materials and chemical products manufacturing		22.7299	0.118919	2.99573	1.07152	0.300747	2.07944	0.412477	0.272727	320000	1	0.095744	0.318454
600486	2019	4	1.417	3.26052	Chemical raw materials and chemical products manufacturing		22.9889	0.114841	3.04452	1.30348	0.388823	2.07944	0.399876	0	320000	1	0.0635	0.318454
600486	2020	3	1.074	3.39845	Chemical raw materials and chemical products manufacturing		23.1116	0.105382	3.09104	1.65026	0.374132	2.19722	0.404977	0.25	320000	1	0.194408	0.287657
600486	2021	4	1.594	3.30089	Chemical raw materials and chemical products manufacturing		23.296	0.0892416	3.13549	1.52017	0.385131	2.19722	0.402999	0.142857	320000	1	0.13288	0.287657
600486	2022	5	1.438	3.31221	Chemical raw materials and chemical products manufacturing		23.4175	0.114561	3.17805	1.28074	0.352595	2.19722	0.399845	0.222222	320000	1	0.267722	0.287657
600486	2023	5	1.438	3.40536	Chemical raw materials and chemical products manufacturing		23.4771	0.0950696	3.21888	1.10141	0.324782	2.07944	0.416892	0.25	320000	1	0.210684	0.318454
600500	2019	1	1	3.476	Chemical raw materials and chemical products manufacturing		24.6873	0.0298824	3.09104	0.600025	0.418783	1.79176	0.479719	0.25	310000	1	0.0682859	0.405465
600500	2021	1	1	3.61285	Chemical raw materials and chemical products manufacturing		24.7832	0.107349	3.17805	0.72425	0.504544	1.94591	0.452029	0.142857	310000	1	0.0351695	0.356695
600589	2013	1	1	3.36643	Chemical raw materials and chemical products manufacturing		21.9555	0.0157649	2.83321	0.830135	0.344217	1.94591	0.324371	0	440000	0	0.158496	0.356695
600618	2011	1	1	3.347	Chemical raw materials and chemical products manufacturing		22.5163	0.0369881	2.99573	1.03218	0.43346	2.19722	0.411657	0.285714	310000	1	0	0.287657
600618	2012	2	1.5	3.41327	Chemical raw materials and chemical products manufacturing		22.5702	0.0173817	3.04452	0.989445	0.432578	2.19722	0.411953	0.428571	310000	1	0	0.287657
600618	2022	1	1	3.77867	Chemical raw materials and chemical products manufacturing		23.1366	0.113079	3.43399	0.729505	0.229982	2.19722	0.396368	0.428571	310000	1	0.0696078	0.287657
600623	2016	1	1	3.68446	Chemical raw materials and chemical products manufacturing		24.3005	0.0137026	3.21888	0.741249	0.37894	1.79176	0.567843	0.153846	310000	1	0.113648	0.405465
600636	2011	2	1.5	3.41475	Chemical raw materials and chemical products manufacturing		21.9926	0.174626	2.99573	1.23862	0.375973	2.19722	0.285969	0.166667	310000	1	0	0.287657
600636	2012	3	1.667	3.41327	Chemical raw materials and chemical products manufacturing		22.0148	0.0515567	3.04452	1.03701	0.35899	2.19722	0.285584	0.166667	310000	1	0.0319516	0.287657
600636	2013	3	1.667	3.44015	Chemical raw materials and chemical products manufacturing		21.9247	0.0380673	3.09104	0.984917	0.314983	2.19722	0.284029	0	310000	1	0	0.287657
600636	2014	1	1	3.35459	Chemical raw materials and chemical products manufacturing		22.0794	0.0125806	3.13549	1.02636	0.376027	2.19722	0.285292	0	310000	1	0.0321468	0.287657
600636	2015	1	1	3.4813	Chemical raw materials and chemical products manufacturing		22.2428	-0.0696606	3.17805	1.01817	0.241696	2.07944	0.335635	0	310000	1	0	0.318454
600636	2016	1	1	3.6065	Chemical raw materials and chemical products manufacturing		22.1485	-0.0569591	3.21888	0.933257	0.233579	2.07944	0.335635	0	310000	1	0.0333364	0.318454
600636	2018	3	1.667	3.71643	Chemical raw materials and chemical products manufacturing		21.9739	0.144941	3.29584	0.907758	0.0935203	2.19722	0.368732	0	310000	1	0.182842	0.287657
600636	2019	1	1	3.71177	Chemical raw materials and chemical products manufacturing		21.985	0.0350652	3.3322	0.876828	0.111028	2.07944	0.368735	0	310000	1	0.13427	0.318454
600636	2020	3	1.667	3.76329	Chemical raw materials and chemical products manufacturing		21.9057	0.0472575	3.3673	1.06639	0.0642087	2.19722	0.368735	0	310000	1	0.262111	0.287657
600691	2021	2	0.875	3.54393	Chemical raw materials and chemical products manufacturing		23.9193	0.020605	3.52636	0.796727	0.542592	2.19722	0.413817	0.25	140000	1	0.120935	0.287657
600691	2023	1	1	3.49661	Chemical raw materials and chemical products manufacturing		23.8377	-0.106571	3.58352	0.760395	0.588054	2.19722	0.413521	0	140000	1	0.254083	0.287657
600731	2018	1	1	3.30636	Chemical raw materials and chemical products manufacturing		21.5328	0.0340055	3.21888	0.758141	0.391293	1.94591	0.332011	0.375	430000	1	0.15396	0.356695
600746	2011	2	1.5	3.33835	Chemical raw materials and chemical products manufacturing		20.516	0.0244418	2.77259	1.28407	0.37092	1.94591	0.462918	0	320000	1	0	0.356695
600746	2012	3	1.667	3.34319	Chemical raw materials and chemical products manufacturing		20.3916	-0.0586091	2.83321	1.19364	0.359373	1.94591	0.460287	0	320000	1	0.144082	0.356695
600746	2013	4	1.594	3.37164	Chemical raw materials and chemical products manufacturing		20.2518	0.0440033	2.89037	1.44343	0.264086	1.79176	0.47248	0	320000	1	0.145606	0.405465
600746	2014	2	1.5	3.28038	Chemical raw materials and chemical products manufacturing		20.1418	0.0185474	2.94444	1.65179	0.196861	1.94591	0.47187	0	320000	1	0.205111	0.356695
600746	2015	4	1.316	3.32649	Chemical raw materials and chemical products manufacturing		20.0611	-0.0401676	2.99573	1.79087	0.174796	1.94591	0.458438	0	320000	1	0.181245	0.356695
600746	2016	8	1.728	3.23964	Chemical raw materials and chemical products manufacturing		20.2723	0.0336246	3.04452	1.99023	0.270659	1.94591	0.481211	0	320000	1	0.0812134	0.356695
600746	2017	2	0.875	3.22631	Chemical raw materials and chemical products manufacturing		20.2916	0.109335	3.09104	1.62271	0.202853	1.79176	0.452716	0.25	320000	1	0.0746058	0.405465
600746	2018	5	1.41	3.2394	Chemical raw materials and chemical products manufacturing		20.0893	0.00673192	3.13549	1.48508	0.107665	1.94591	0.462664	0.2	320000	1	0.0287707	0.356695
600746	2019	5	1.438	3.23381	Chemical raw materials and chemical products manufacturing		21.9977	-0.00157738	3.17805	0.660862	0.276405	1.94591	0.475349	0.285714	320000	1	0.311058	0.356695
600746	2020	5	1.509	3.30673	Chemical raw materials and chemical products manufacturing		21.9945	0.0628625	3.21888	0.832461	0.159803	1.94591	0.632444	0.222222	320000	1	0.355536	0.356695
[truncated: 4,252 more rows]
